# Supplementary material for: Leveraging Twitter to gauge evacuation compliance: Spatiotemporal analysis of Hurricane Matthew
Source: PLoS One. 2017 Jul 28;12(7):e0181701. doi: 10.1371/journal.pone.0181701 (PMC5533310; doi:10.1371/journal.pone.0181701)
Supplement: S1 File — Including user locations during pre-evacuation period and post-evacuation period. (XLSX) [file pone.0181701.s001.xlsx]

## Sheet: Pre-evacuation
id	STATEFP	COUNTYFP	COUNTYNS	NAME	dist_m
1	45	013	01247984	Beaufort	6839.86
2	45	013	01247984	Beaufort	14854.3
3	45	051	01248005	Horry	898.961
4	45	051	01248005	Horry	12233.6
5	45	051	01248005	Horry	14177.9
6	45	051	01248005	Horry	25653
7	45	051	01248005	Horry	896.493
8	45	019	01252740	Charleston	18666.3
9	45	051	01248005	Horry	6387.44
10	45	035	01247998	Dorchester	33585.8
11	45	013	01247984	Beaufort	13374
12	45	051	01248005	Horry	911.555
13	45	019	01252740	Charleston	18659.1
14	45	019	01252740	Charleston	18660.4
15	45	035	01247998	Dorchester	33591.6
16	45	051	01248005	Horry	7521.38
17	45	051	01248005	Horry	12226.3
18	45	015	01247985	Berkeley	18736
19	45	019	01252740	Charleston	8050.55
20	45	019	01252740	Charleston	7469.46
21	45	051	01248005	Horry	12226.5
22	45	019	01252740	Charleston	18682.4
23	45	051	01248005	Horry	12225.8
24	45	051	01248005	Horry	12223.7
25	45	013	01247984	Beaufort	14659.5
26	45	051	01248005	Horry	12227
27	45	051	01248005	Horry	12226.1
28	45	019	01252740	Charleston	18661.4
29	45	013	01247984	Beaufort	1555.84
30	45	019	01252740	Charleston	18661
31	45	051	01248005	Horry	12225
32	45	019	01252740	Charleston	18657.3
33	45	051	01248005	Horry	895.535
34	45	015	01247985	Berkeley	27606.1
35	45	051	01248005	Horry	12226.2
36	45	015	01247985	Berkeley	44425.8
37	45	035	01247998	Dorchester	33591.2
38	45	015	01247985	Berkeley	14092.8
39	45	051	01248005	Horry	2643.56
40	45	051	01248005	Horry	895.912
41	45	051	01248005	Horry	12225.7
42	45	043	01248002	Georgetown	2416.27
43	45	051	01248005	Horry	12245.4
44	45	051	01248005	Horry	6386.5
45	45	051	01248005	Horry	2392.75
46	45	051	01248005	Horry	2394.17
47	45	051	01248005	Horry	6174.02
48	45	051	01248005	Horry	2393.02
49	45	051	01248005	Horry	6380.02
50	45	051	01248005	Horry	12228.3
51	45	051	01248005	Horry	6383.09
52	45	051	01248005	Horry	25660
53	45	019	01252740	Charleston	8066.53
54	45	015	01247985	Berkeley	17293.7
55	45	015	01247985	Berkeley	33311.4
56	45	051	01248005	Horry	12224.6
57	45	019	01252740	Charleston	18658.9
58	45	019	01252740	Charleston	18657.2
59	45	015	01247985	Berkeley	30957.6
60	45	051	01248005	Horry	12216.4
61	45	013	01247984	Beaufort	13368.6
62	45	015	01247985	Berkeley	18740.2
63	45	051	01248005	Horry	12229.9
64	45	043	01248002	Georgetown	2418.53
65	45	053	01248006	Jasper	28625.5
66	45	019	01252740	Charleston	18666.7
67	45	019	01252740	Charleston	6500.08
68	45	019	01252740	Charleston	18665.3
69	45	019	01252740	Charleston	8068.29
70	45	051	01248005	Horry	6385.15
71	45	019	01252740	Charleston	796.075
72	45	019	01252740	Charleston	18663.3
73	45	051	01248005	Horry	12228.9
74	45	043	01248002	Georgetown	228.427
75	45	051	01248005	Horry	12225.1
76	45	015	01247985	Berkeley	44431.1
77	45	051	01248005	Horry	7524.34
78	45	019	01252740	Charleston	8065.25
79	45	019	01252740	Charleston	7475.12
80	45	051	01248005	Horry	25659
81	45	051	01248005	Horry	2392.57
82	45	019	01252740	Charleston	6707.64
83	45	035	01247998	Dorchester	33589.5
84	45	051	01248005	Horry	887.788
85	45	051	01248005	Horry	12202.9
86	45	051	01248005	Horry	896.381
87	45	051	01248005	Horry	12226.9
88	45	051	01248005	Horry	12225.6
89	45	051	01248005	Horry	1372.16
90	45	051	01248005	Horry	898.144
91	45	019	01252740	Charleston	18659.3
92	45	051	01248005	Horry	6385.61
93	45	051	01248005	Horry	25656.4
94	45	043	01248002	Georgetown	2666.01
95	45	051	01248005	Horry	6183.32
96	45	051	01248005	Horry	1376.26
97	45	019	01252740	Charleston	18653.5
98	45	019	01252740	Charleston	8062.39
99	45	051	01248005	Horry	6385.57
100	45	019	01252740	Charleston	8066
101	45	051	01248005	Horry	12227.9
102	45	051	01248005	Horry	25656.9
103	45	051	01248005	Horry	2395.89
104	45	051	01248005	Horry	12225.4
105	45	043	01248002	Georgetown	13842.6
106	45	051	01248005	Horry	6385.6
107	45	051	01248005	Horry	12226.2
108	45	051	01248005	Horry	902.62
109	45	051	01248005	Horry	895.066
110	45	013	01247984	Beaufort	3964.67
111	45	035	01247998	Dorchester	33479.4
112	45	051	01248005	Horry	12228.7
113	45	015	01247985	Berkeley	27604.5
114	45	019	01252740	Charleston	18682.5
115	45	051	01248005	Horry	12253.3
116	45	013	01247984	Beaufort	14852.1
117	45	051	01248005	Horry	12226.5
118	45	051	01248005	Horry	5681.36
119	45	051	01248005	Horry	12226.8
120	45	051	01248005	Horry	894.919
121	45	019	01252740	Charleston	8067.17
122	45	051	01248005	Horry	12229.2
123	45	019	01252740	Charleston	7468.35
124	45	019	01252740	Charleston	18657.7
125	45	019	01252740	Charleston	8063.85
126	45	035	01247998	Dorchester	33589.4
127	45	019	01252740	Charleston	8066.66
128	45	051	01248005	Horry	2392.17
129	45	019	01252740	Charleston	18658.8
130	45	019	01252740	Charleston	18655.1
131	45	051	01248005	Horry	7511.08
132	45	015	01247985	Berkeley	18736.8
133	45	019	01252740	Charleston	8067.07
134	45	051	01248005	Horry	4246.25
135	45	015	01247985	Berkeley	27606.4
136	45	019	01252740	Charleston	8046.69
137	45	043	01248002	Georgetown	2668.36
138	45	051	01248005	Horry	6385.61
139	45	019	01252740	Charleston	7468.35
140	45	013	01247984	Beaufort	14855.2
141	45	019	01252740	Charleston	8066.93
142	45	051	01248005	Horry	2392.91
143	45	051	01248005	Horry	6178.48
144	45	051	01248005	Horry	12226.9
145	45	051	01248005	Horry	12227.4
146	45	019	01252740	Charleston	18668.4
147	45	019	01252740	Charleston	8069.36
148	45	019	01252740	Charleston	18659.3
149	45	051	01248005	Horry	894.282
150	45	051	01248005	Horry	7527.8
151	45	035	01247998	Dorchester	33592.4
152	45	035	01247998	Dorchester	33597.1
153	45	019	01252740	Charleston	8067.42
154	45	019	01252740	Charleston	18662.3
155	45	019	01252740	Charleston	18657.5
156	45	019	01252740	Charleston	18647.3
157	45	051	01248005	Horry	1378.84
158	45	051	01248005	Horry	11963.5
159	45	015	01247985	Berkeley	33313.4
160	45	051	01248005	Horry	12223.2
161	45	051	01248005	Horry	12225.5
162	45	051	01248005	Horry	12179.8
163	45	035	01247998	Dorchester	33593.5
164	45	013	01247984	Beaufort	6781.26
165	45	015	01247985	Berkeley	28585.9
166	45	051	01248005	Horry	2391.76
167	45	051	01248005	Horry	2390.99
168	45	019	01252740	Charleston	7456.96
169	45	015	01247985	Berkeley	30952.4
170	45	043	01248002	Georgetown	2665.15
171	45	051	01248005	Horry	12227.3
172	45	051	01248005	Horry	12225.3
173	45	051	01248005	Horry	12220.3
174	45	051	01248005	Horry	4861.68
175	45	035	01247998	Dorchester	33592
176	45	019	01252740	Charleston	8066.95
177	45	051	01248005	Horry	12226.8
178	45	051	01248005	Horry	405.473
179	45	051	01248005	Horry	903.592
180	45	051	01248005	Horry	12229.3
181	45	035	01247998	Dorchester	33570.6
182	45	051	01248005	Horry	894.898
183	45	035	01247998	Dorchester	34163.8
184	45	013	01247984	Beaufort	3961.71
185	45	015	01247985	Berkeley	30957.1
186	45	051	01248005	Horry	12225.8
187	45	051	01248005	Horry	25657
188	45	019	01252740	Charleston	7469.19
189	45	051	01248005	Horry	12231.7
190	45	019	01252740	Charleston	7468.31
191	45	019	01252740	Charleston	7850.12
192	45	035	01247998	Dorchester	33591.7
193	45	019	01252740	Charleston	8051.84
194	45	051	01248005	Horry	867.323
195	45	019	01252740	Charleston	18658.2
196	45	035	01247998	Dorchester	33588.5
197	45	051	01248005	Horry	907.095
198	45	013	01247984	Beaufort	6784.84
199	45	019	01252740	Charleston	8066.84
200	45	035	01247998	Dorchester	33584.9
201	45	051	01248005	Horry	12233.3
202	45	035	01247998	Dorchester	33581.4
203	45	015	01247985	Berkeley	30952.4
204	45	019	01252740	Charleston	18660
205	45	051	01248005	Horry	12232.6
206	45	051	01248005	Horry	12223.9
207	45	019	01252740	Charleston	8112.79
208	45	019	01252740	Charleston	18659.7
209	45	013	01247984	Beaufort	13375.6
210	45	015	01247985	Berkeley	27606.4
211	45	043	01248002	Georgetown	2663.53
212	45	051	01248005	Horry	6386.44
213	45	019	01252740	Charleston	18657.9
214	45	019	01252740	Charleston	7468.79
215	45	051	01248005	Horry	12228.2
216	45	019	01252740	Charleston	730.251
217	45	019	01252740	Charleston	18662.9
218	45	051	01248005	Horry	6386.67
219	45	019	01252740	Charleston	6713.15
220	45	013	01247984	Beaufort	3960.72
221	45	051	01248005	Horry	8655.79
222	45	013	01247984	Beaufort	3961.92
223	45	051	01248005	Horry	1520.7
224	45	019	01252740	Charleston	18651.3
225	45	051	01248005	Horry	12226.5
226	45	015	01247985	Berkeley	30967.5
227	45	013	01247984	Beaufort	4043.57
228	45	051	01248005	Horry	12225.1
229	45	051	01248005	Horry	12226.8
230	45	053	01248006	Jasper	29036.2
231	45	019	01252740	Charleston	18657.3
232	45	015	01247985	Berkeley	18736
233	45	035	01247998	Dorchester	33591.4
234	45	053	01248006	Jasper	29042.5
235	45	019	01252740	Charleston	1968.51
236	45	019	01252740	Charleston	961.257
237	45	051	01248005	Horry	897.3
238	45	051	01248005	Horry	12221.9
239	45	051	01248005	Horry	896.215
240	45	051	01248005	Horry	25654.9
241	45	051	01248005	Horry	12230.5
242	45	051	01248005	Horry	895.804
243	45	051	01248005	Horry	6883.65
244	45	051	01248005	Horry	1784.81
245	45	019	01252740	Charleston	18658.4
246	45	019	01252740	Charleston	8063.76
247	45	035	01247998	Dorchester	33589.4
248	45	051	01248005	Horry	25653.8
249	45	051	01248005	Horry	7512.92
250	45	019	01252740	Charleston	8066.35
251	45	051	01248005	Horry	12225
252	45	051	01248005	Horry	6380.33
253	45	051	01248005	Horry	12228.2
254	45	051	01248005	Horry	12225.6
255	45	013	01247984	Beaufort	13372
256	45	051	01248005	Horry	12227.6
257	45	015	01247985	Berkeley	30960.9
258	45	013	01247984	Beaufort	6782.21
259	45	051	01248005	Horry	129.978
260	45	015	01247985	Berkeley	33309.1
261	45	015	01247985	Berkeley	27606.3
262	45	051	01248005	Horry	12201.7
263	45	013	01247984	Beaufort	13371.4
264	45	051	01248005	Horry	12226.6
265	45	051	01248005	Horry	12225.6
266	45	051	01248005	Horry	894.519
267	45	051	01248005	Horry	29060.7
268	45	051	01248005	Horry	6396.22
269	45	051	01248005	Horry	12225.4
270	45	051	01248005	Horry	2391.45
271	45	051	01248005	Horry	894.342
272	45	051	01248005	Horry	12227.3
273	45	051	01248005	Horry	12229.8
274	45	035	01247998	Dorchester	33539.3
275	45	051	01248005	Horry	7484.42
276	45	015	01247985	Berkeley	18742
277	45	019	01252740	Charleston	798.595
278	45	051	01248005	Horry	12226.9
279	45	015	01247985	Berkeley	44428.9
280	45	051	01248005	Horry	4992.6
281	45	035	01247998	Dorchester	33594.7
282	45	019	01252740	Charleston	8067.47
283	45	051	01248005	Horry	2392.5
284	45	051	01248005	Horry	6390.69
285	45	019	01252740	Charleston	13154.8
286	45	019	01252740	Charleston	18653.7
287	45	015	01247985	Berkeley	18739.4
288	45	051	01248005	Horry	894.686
289	45	019	01252740	Charleston	348.572
290	45	051	01248005	Horry	901.332
291	45	051	01248005	Horry	407.48
292	45	051	01248005	Horry	12229.4
293	45	051	01248005	Horry	6385.28
294	45	015	01247985	Berkeley	27606.6
295	45	051	01248005	Horry	12227.6
296	45	019	01252740	Charleston	8068.53
297	45	019	01252740	Charleston	18657.5
298	45	051	01248005	Horry	7530.31
299	45	019	01252740	Charleston	19136.5
300	45	015	01247985	Berkeley	27606.5
301	45	035	01247998	Dorchester	33591.8
302	45	051	01248005	Horry	12230.6
303	45	051	01248005	Horry	12230.9
304	45	051	01248005	Horry	12227.2
305	45	019	01252740	Charleston	18668.3
306	45	019	01252740	Charleston	18657.9
307	45	019	01252740	Charleston	8072.51
308	45	051	01248005	Horry	1372.39
309	45	019	01252740	Charleston	8062.64
310	45	051	01248005	Horry	12226.4
311	45	051	01248005	Horry	6384.9
312	45	019	01252740	Charleston	18659.9
313	45	051	01248005	Horry	2391.11
314	45	051	01248005	Horry	895.336
315	45	051	01248005	Horry	1474.85
316	45	019	01252740	Charleston	18681.7
317	45	051	01248005	Horry	12224.3
318	45	043	01248002	Georgetown	39341.9
319	45	051	01248005	Horry	815.186
320	45	035	01247998	Dorchester	33597.6
321	45	019	01252740	Charleston	18657.6
322	45	015	01247985	Berkeley	44429.9
323	45	013	01247984	Beaufort	14855.5
324	45	019	01252740	Charleston	18657.1
325	45	051	01248005	Horry	2390
326	45	051	01248005	Horry	12225.3
327	45	015	01247985	Berkeley	27600.2
328	45	019	01252740	Charleston	8067.73
329	45	051	01248005	Horry	12233.2
330	45	051	01248005	Horry	12208.2
331	45	019	01252740	Charleston	18657.3
332	45	051	01248005	Horry	12234.2
333	45	019	01252740	Charleston	8028.86
334	45	051	01248005	Horry	12227.6
335	45	013	01247984	Beaufort	14855
336	45	051	01248005	Horry	12227.1
337	45	051	01248005	Horry	12224.8
338	45	051	01248005	Horry	12228.7
339	45	019	01252740	Charleston	8053.52
340	45	051	01248005	Horry	7201.84
341	45	019	01252740	Charleston	8068.23
342	45	051	01248005	Horry	12226.7
343	45	051	01248005	Horry	14929.2
344	45	051	01248005	Horry	25470.7
345	45	051	01248005	Horry	12230.7
346	45	019	01252740	Charleston	9339.84
347	45	019	01252740	Charleston	18656.4
348	45	043	01248002	Georgetown	2424.99
349	45	043	01248002	Georgetown	2610.6
350	45	051	01248005	Horry	12226
351	45	051	01248005	Horry	7521.61
352	45	051	01248005	Horry	12227.9
353	45	019	01252740	Charleston	18657.2
354	45	051	01248005	Horry	1370.18
355	45	019	01252740	Charleston	8034.51
356	45	051	01248005	Horry	817.224
357	45	051	01248005	Horry	1938.54
358	45	013	01247984	Beaufort	14854.5
359	45	051	01248005	Horry	12228.3
360	45	051	01248005	Horry	12253.5
361	45	051	01248005	Horry	12216.9
362	45	015	01247985	Berkeley	27606.1
363	45	019	01252740	Charleston	18657.6
364	45	035	01247998	Dorchester	33591
365	45	043	01248002	Georgetown	13847.6
366	45	035	01247998	Dorchester	33592.4
367	45	051	01248005	Horry	12226.6
368	45	019	01252740	Charleston	8066.29
369	45	051	01248005	Horry	899.457
370	45	051	01248005	Horry	1046.54
371	45	051	01248005	Horry	898.318
372	45	051	01248005	Horry	911.096
373	45	019	01252740	Charleston	18654.7
374	45	019	01252740	Charleston	7462.57
375	45	043	01248002	Georgetown	13824.4
376	45	013	01247984	Beaufort	14855.7
377	45	051	01248005	Horry	12233.1
378	45	053	01248006	Jasper	29044.8
379	45	043	01248002	Georgetown	2417.26
380	45	051	01248005	Horry	12226.3
381	45	043	01248002	Georgetown	2665.78
382	45	051	01248005	Horry	2391.02
383	45	015	01247985	Berkeley	27604.4
384	45	051	01248005	Horry	12226.6
385	45	019	01252740	Charleston	8064.4
386	45	013	01247984	Beaufort	3962.45
387	45	051	01248005	Horry	12259.5
388	45	051	01248005	Horry	2384.79
389	45	043	01248002	Georgetown	2667.47
390	45	051	01248005	Horry	6386.48
391	45	019	01252740	Charleston	8066.93
392	45	019	01252740	Charleston	8066.76
393	45	051	01248005	Horry	9522.41
394	45	015	01247985	Berkeley	27604.7
395	45	051	01248005	Horry	5933.15
396	45	051	01248005	Horry	2391.45
397	45	035	01247998	Dorchester	33593.7
398	45	051	01248005	Horry	12231.8
399	45	019	01252740	Charleston	18660.5
400	45	051	01248005	Horry	1374.52
401	45	013	01247984	Beaufort	8733.66
402	45	051	01248005	Horry	12222.2
403	45	051	01248005	Horry	896.612
404	45	019	01252740	Charleston	7462.45
405	45	051	01248005	Horry	12225.8
406	45	035	01247998	Dorchester	33587.3
407	45	051	01248005	Horry	961.142
408	45	019	01252740	Charleston	118.992
409	45	051	01248005	Horry	6386.21
410	45	019	01252740	Charleston	8062.73
411	45	051	01248005	Horry	6386.28
412	45	051	01248005	Horry	893.144
413	45	015	01247985	Berkeley	27604.3
414	45	035	01247998	Dorchester	33591.9
415	45	051	01248005	Horry	2390.6
416	45	013	01247984	Beaufort	10934.6
417	45	015	01247985	Berkeley	23890.3
418	45	035	01247998	Dorchester	33580.7
419	45	019	01252740	Charleston	18658.1
420	45	051	01248005	Horry	12225
421	45	019	01252740	Charleston	18656.8
422	45	019	01252740	Charleston	18658
423	45	019	01252740	Charleston	8066.7
424	45	051	01248005	Horry	7524.89
425	45	035	01247998	Dorchester	33590.2
426	45	019	01252740	Charleston	18662.6
427	45	019	01252740	Charleston	18651.3
428	45	035	01247998	Dorchester	33591.8
429	45	015	01247985	Berkeley	44426.7
430	45	015	01247985	Berkeley	27596.7
431	45	051	01248005	Horry	894.831
432	45	019	01252740	Charleston	8064.97
433	45	035	01247998	Dorchester	33585.6
434	45	051	01248005	Horry	2391.49
435	45	015	01247985	Berkeley	27606.2
436	45	051	01248005	Horry	6386.4
437	45	051	01248005	Horry	896.76
438	45	051	01248005	Horry	12223.5
439	45	019	01252740	Charleston	18657.9
440	45	019	01252740	Charleston	18656.4
441	45	043	01248002	Georgetown	27009.9
442	45	051	01248005	Horry	12225.9
443	45	051	01248005	Horry	6385.63
444	45	019	01252740	Charleston	18659.1
445	45	051	01248005	Horry	12226.1
446	45	019	01252740	Charleston	18658.1
447	45	019	01252740	Charleston	18657.5
448	45	051	01248005	Horry	12228.3
449	45	019	01252740	Charleston	10126.7
450	45	019	01252740	Charleston	18664.1
451	45	019	01252740	Charleston	8066.93
452	45	051	01248005	Horry	2411.12
453	45	015	01247985	Berkeley	27608.8
454	45	051	01248005	Horry	2981.5
455	45	051	01248005	Horry	2391.98
456	45	013	01247984	Beaufort	3963.58
457	45	051	01248005	Horry	6213.82
458	45	051	01248005	Horry	895.861
459	45	051	01248005	Horry	12225.1
460	45	015	01247985	Berkeley	18738.9
461	45	019	01252740	Charleston	18661.1
462	45	051	01248005	Horry	4135.99
463	45	051	01248005	Horry	17362.7
464	45	051	01248005	Horry	12227.1
465	45	019	01252740	Charleston	14.8123
466	45	051	01248005	Horry	12222.5
467	45	013	01247984	Beaufort	14843.8
468	45	019	01252740	Charleston	8067.3
469	45	035	01247998	Dorchester	33597.2
470	45	051	01248005	Horry	25647.4
471	45	051	01248005	Horry	12225.2
472	45	043	01248002	Georgetown	2663.58
473	45	043	01248002	Georgetown	2420.53
474	45	019	01252740	Charleston	18658
475	45	051	01248005	Horry	12227.9
476	45	051	01248005	Horry	12216.1
477	45	051	01248005	Horry	899.656
478	45	051	01248005	Horry	25651.1
479	45	051	01248005	Horry	12223.8
480	45	019	01252740	Charleston	18657.2
481	45	019	01252740	Charleston	8066.93
482	45	051	01248005	Horry	895.734
483	45	051	01248005	Horry	15520.4
484	45	013	01247984	Beaufort	13374
485	45	043	01248002	Georgetown	1328.33
486	45	013	01247984	Beaufort	3961.99
487	45	019	01252740	Charleston	7800.92
488	45	035	01247998	Dorchester	33589.8
489	45	019	01252740	Charleston	8068.85
490	45	019	01252740	Charleston	8062.61
491	45	013	01247984	Beaufort	3960.72
492	45	019	01252740	Charleston	7468.22
493	45	051	01248005	Horry	12227.4
494	45	035	01247998	Dorchester	33592
495	45	019	01252740	Charleston	8060.36
496	45	051	01248005	Horry	4133.7
497	45	019	01252740	Charleston	18657.5
498	45	051	01248005	Horry	12225.6
499	45	051	01248005	Horry	2391.97
500	45	019	01252740	Charleston	7465.98
501	45	015	01247985	Berkeley	27607.9
502	45	051	01248005	Horry	913.54
503	45	051	01248005	Horry	12228.4
504	45	051	01248005	Horry	2318.64
505	45	051	01248005	Horry	23085.4
506	45	043	01248002	Georgetown	231.959
507	45	013	01247984	Beaufort	3962.5
508	45	051	01248005	Horry	17351
509	45	015	01247985	Berkeley	18739.3
510	45	051	01248005	Horry	901.291
511	45	051	01248005	Horry	12228
512	45	051	01248005	Horry	6383.27
513	45	019	01252740	Charleston	8067.16
514	45	019	01252740	Charleston	7989.18
515	45	013	01247984	Beaufort	1556.6
516	45	035	01247998	Dorchester	33587.8
517	45	019	01252740	Charleston	18657.3
518	45	015	01247985	Berkeley	38362.2
519	45	051	01248005	Horry	845.122
520	45	051	01248005	Horry	25653.3
521	45	051	01248005	Horry	12227.3
522	45	051	01248005	Horry	12227.4
523	45	051	01248005	Horry	6377.57
524	45	015	01247985	Berkeley	33307.6
525	45	043	01248002	Georgetown	2422.62
526	45	051	01248005	Horry	900.402
527	45	051	01248005	Horry	896.743
528	45	043	01248002	Georgetown	13842.9
529	45	015	01247985	Berkeley	44422.2
530	45	051	01248005	Horry	12221.3
531	45	013	01247984	Beaufort	14977.6
532	45	019	01252740	Charleston	18701
533	45	019	01252740	Charleston	18662
534	45	019	01252740	Charleston	8068.93
535	45	051	01248005	Horry	7221.66
536	45	051	01248005	Horry	895.537
537	45	043	01248002	Georgetown	13854
538	45	015	01247985	Berkeley	8458.98
539	45	051	01248005	Horry	2394.85
540	45	019	01252740	Charleston	8066.93
541	45	015	01247985	Berkeley	18736.9
542	45	019	01252740	Charleston	8068.52
543	45	019	01252740	Charleston	8066.93
544	45	019	01252740	Charleston	18654.4
545	45	019	01252740	Charleston	18657.5
546	45	051	01248005	Horry	12230.3
547	45	015	01247985	Berkeley	27604.7
548	45	013	01247984	Beaufort	14531
549	45	051	01248005	Horry	12227.5
550	45	051	01248005	Horry	894.686
551	45	015	01247985	Berkeley	30961.3
552	45	035	01247998	Dorchester	33590.2
553	45	051	01248005	Horry	6380.62
554	45	019	01252740	Charleston	18662.6
555	45	051	01248005	Horry	6382.16
556	45	051	01248005	Horry	12221.7
557	45	015	01247985	Berkeley	27606.4
558	45	015	01247985	Berkeley	28334
559	45	035	01247998	Dorchester	33593.4
560	45	051	01248005	Horry	12226.6
561	45	051	01248005	Horry	896.07
562	45	051	01248005	Horry	7021.54
563	45	051	01248005	Horry	7519.74
564	45	051	01248005	Horry	12227.8
565	45	015	01247985	Berkeley	30959.4
566	45	051	01248005	Horry	938.562
567	45	035	01247998	Dorchester	33261.8
568	45	051	01248005	Horry	811.436
569	45	013	01247984	Beaufort	14856.6
570	45	043	01248002	Georgetown	13840.5
571	45	019	01252740	Charleston	18657.4
572	45	051	01248005	Horry	3525.63
573	45	043	01248002	Georgetown	13843.5
574	45	015	01247985	Berkeley	27605
575	45	051	01248005	Horry	92.293
576	45	015	01247985	Berkeley	9845.5
577	45	051	01248005	Horry	12227.6
578	45	015	01247985	Berkeley	27606.2
579	45	051	01248005	Horry	17820.4
580	45	051	01248005	Horry	6389.98
581	45	051	01248005	Horry	25660.3
582	45	015	01247985	Berkeley	21246.1
583	45	019	01252740	Charleston	18657.5
584	45	051	01248005	Horry	12227
585	45	019	01252740	Charleston	731.567
586	45	051	01248005	Horry	6383.96
587	45	051	01248005	Horry	12228.8
588	45	019	01252740	Charleston	18657.2
589	45	015	01247985	Berkeley	4544.21
590	45	051	01248005	Horry	2391.45
591	45	051	01248005	Horry	12225.5
592	45	051	01248005	Horry	2398.02
593	45	051	01248005	Horry	6187.58
594	45	035	01247998	Dorchester	33591.6
595	45	051	01248005	Horry	12226.6
596	45	013	01247984	Beaufort	7853.29
597	45	051	01248005	Horry	2391.23
598	45	019	01252740	Charleston	18659.1
599	45	013	01247984	Beaufort	14855
600	45	013	01247984	Beaufort	3960.43
601	45	051	01248005	Horry	12229
602	45	019	01252740	Charleston	18657.8
603	45	051	01248005	Horry	895.554
604	45	051	01248005	Horry	12229.2
605	45	019	01252740	Charleston	18659.1
606	45	051	01248005	Horry	3386.49
607	45	013	01247984	Beaufort	13373.1
608	45	035	01247998	Dorchester	33591.3
609	45	013	01247984	Beaufort	8824.82
610	45	013	01247984	Beaufort	14991.8
611	45	019	01252740	Charleston	18658.3
612	45	019	01252740	Charleston	18659.9
613	45	051	01248005	Horry	12225.4
614	45	015	01247985	Berkeley	27605.4
615	45	051	01248005	Horry	6384.93
616	45	051	01248005	Horry	6385.44
617	45	051	01248005	Horry	12224.1
618	45	019	01252740	Charleston	18644.9
619	45	035	01247998	Dorchester	35485.6
620	45	013	01247984	Beaufort	10274.2
621	45	051	01248005	Horry	12232.1
622	45	051	01248005	Horry	12227.8
623	45	051	01248005	Horry	12225.5
624	45	051	01248005	Horry	12226.6
625	45	051	01248005	Horry	12224.2
626	45	051	01248005	Horry	7527.56
627	45	051	01248005	Horry	12226.1
628	45	015	01247985	Berkeley	30958.6
629	45	013	01247984	Beaufort	16362.3
630	45	019	01252740	Charleston	18682.8
631	45	015	01247985	Berkeley	27604.1
632	45	051	01248005	Horry	12226.8
633	45	051	01248005	Horry	12230.7
634	45	051	01248005	Horry	12237.9
635	45	051	01248005	Horry	4126.7
636	45	051	01248005	Horry	7509.56
637	45	051	01248005	Horry	12224
638	45	051	01248005	Horry	12227
639	45	015	01247985	Berkeley	18739.3
640	45	035	01247998	Dorchester	33590.6
641	45	015	01247985	Berkeley	27610.4
642	45	051	01248005	Horry	25654.8
643	45	015	01247985	Berkeley	30961.6
644	45	051	01248005	Horry	12235.4
645	45	019	01252740	Charleston	18659
646	45	019	01252740	Charleston	8066.93
647	45	051	01248005	Horry	12228.6
648	45	051	01248005	Horry	7019.63
649	45	019	01252740	Charleston	18656.9
650	45	019	01252740	Charleston	18672.5
651	45	051	01248005	Horry	2395.93
652	45	015	01247985	Berkeley	44426.9
653	45	019	01252740	Charleston	18670.4
654	45	019	01252740	Charleston	18657.6
655	45	051	01248005	Horry	905.535
656	45	043	01248002	Georgetown	16747.1
657	45	051	01248005	Horry	4132.1
658	45	051	01248005	Horry	12227.6
659	45	015	01247985	Berkeley	30666.5
660	45	019	01252740	Charleston	8070.01
661	45	015	01247985	Berkeley	18731
662	45	051	01248005	Horry	12226.2
663	45	019	01252740	Charleston	8068.32
664	45	051	01248005	Horry	12225.5
665	45	051	01248005	Horry	897.118
666	45	051	01248005	Horry	12220.8
667	45	051	01248005	Horry	895.497
668	45	051	01248005	Horry	898.612
669	45	051	01248005	Horry	11316
670	45	051	01248005	Horry	12224.3
671	45	013	01247984	Beaufort	3967.02
672	45	015	01247985	Berkeley	30959.7
673	45	051	01248005	Horry	7525.57
674	45	019	01252740	Charleston	18658.2
675	45	051	01248005	Horry	900.038
676	45	051	01248005	Horry	12233.2
677	45	019	01252740	Charleston	8065.06
678	45	019	01252740	Charleston	8061.84
679	45	051	01248005	Horry	12232.9
680	45	051	01248005	Horry	12224.1
681	45	043	01248002	Georgetown	13840.7
682	45	051	01248005	Horry	12228.3
683	45	019	01252740	Charleston	18659.3
684	45	051	01248005	Horry	12225.5
685	45	051	01248005	Horry	12226.7
686	45	051	01248005	Horry	898.757
687	45	051	01248005	Horry	12226.6
688	45	051	01248005	Horry	6385.02
689	45	051	01248005	Horry	25661.5
690	45	019	01252740	Charleston	8065.74
691	45	019	01252740	Charleston	7467.76
692	45	015	01247985	Berkeley	27601.8
693	45	051	01248005	Horry	2391.58
694	45	051	01248005	Horry	12224
695	45	013	01247984	Beaufort	6782.88
696	45	051	01248005	Horry	12226.9
697	45	051	01248005	Horry	12228.4
698	45	051	01248005	Horry	12215.2
699	45	019	01252740	Charleston	18657.3
700	45	035	01247998	Dorchester	33588.4
701	45	035	01247998	Dorchester	33589.2
702	45	019	01252740	Charleston	18657.2
703	45	013	01247984	Beaufort	14848.1
704	45	019	01252740	Charleston	18678.1
705	45	051	01248005	Horry	6385.69
706	45	051	01248005	Horry	12233.5
707	45	051	01248005	Horry	4134.18
708	45	051	01248005	Horry	12227.3
709	45	051	01248005	Horry	12227.3
710	45	051	01248005	Horry	2391.12
711	45	051	01248005	Horry	12227
712	45	051	01248005	Horry	12224.5
713	45	051	01248005	Horry	12229.7
714	45	019	01252740	Charleston	357.507
715	45	051	01248005	Horry	12228.8
716	45	035	01247998	Dorchester	33591.8
717	45	051	01248005	Horry	4136.03
718	45	035	01247998	Dorchester	33587.8
719	45	013	01247984	Beaufort	14863.9
720	45	051	01248005	Horry	7525.2
721	45	051	01248005	Horry	12225.7
722	45	015	01247985	Berkeley	27605.2
723	45	051	01248005	Horry	1369.49
724	45	051	01248005	Horry	6383.17
725	45	019	01252740	Charleston	7503.85
726	45	051	01248005	Horry	9011.97
727	45	019	01252740	Charleston	8066.27
728	45	019	01252740	Charleston	18655.7
729	45	019	01252740	Charleston	18657.3
730	45	019	01252740	Charleston	4134.92
731	45	015	01247985	Berkeley	19923.3
732	45	051	01248005	Horry	12229.9
733	45	019	01252740	Charleston	8068.06
734	45	051	01248005	Horry	10706.6
735	45	019	01252740	Charleston	18663
736	45	015	01247985	Berkeley	30958.7
737	45	051	01248005	Horry	894.873
738	45	013	01247984	Beaufort	14857
739	45	051	01248005	Horry	12227.1
740	45	051	01248005	Horry	12226.6
741	45	019	01252740	Charleston	18659.3
742	45	019	01252740	Charleston	7468.16
743	45	019	01252740	Charleston	18660.7
744	45	019	01252740	Charleston	8066.58
745	45	051	01248005	Horry	12218.4
746	45	019	01252740	Charleston	18658.6
747	45	015	01247985	Berkeley	30958.1
748	45	019	01252740	Charleston	18662.2
749	45	051	01248005	Horry	12225.2
750	45	051	01248005	Horry	2390.81
751	45	015	01247985	Berkeley	30958.9
752	45	015	01247985	Berkeley	27607.3
753	45	019	01252740	Charleston	8066.46
754	45	015	01247985	Berkeley	27603.4
755	45	051	01248005	Horry	12227.8
756	45	051	01248005	Horry	894.721
757	45	051	01248005	Horry	104.792
758	45	015	01247985	Berkeley	15964.6
759	45	019	01252740	Charleston	12498.6
760	45	013	01247984	Beaufort	3966.64
761	45	051	01248005	Horry	904.084
762	45	051	01248005	Horry	109.878
763	45	019	01252740	Charleston	18659.6
764	45	043	01248002	Georgetown	2406.91
765	45	019	01252740	Charleston	10754.1
766	45	051	01248005	Horry	895.179
767	45	035	01247998	Dorchester	33592.4
768	45	019	01252740	Charleston	18659
769	45	051	01248005	Horry	19701.2
770	45	051	01248005	Horry	12224.8
771	45	051	01248005	Horry	12229.7
772	45	035	01247998	Dorchester	33591
773	45	051	01248005	Horry	2391.75
774	45	051	01248005	Horry	896.763
775	45	035	01247998	Dorchester	33591.8
776	45	051	01248005	Horry	896.928
777	45	019	01252740	Charleston	8067.28
778	45	051	01248005	Horry	2393.04
779	45	051	01248005	Horry	10617.1
780	45	019	01252740	Charleston	26179.8
781	45	035	01247998	Dorchester	33585.3
782	45	051	01248005	Horry	12225.8
783	45	051	01248005	Horry	12226
784	45	043	01248002	Georgetown	2587.83
785	45	051	01248005	Horry	894.686
786	45	051	01248005	Horry	16885.6
787	45	019	01252740	Charleston	214.987
788	45	019	01252740	Charleston	8067.17
789	45	019	01252740	Charleston	8066.18
790	45	019	01252740	Charleston	8070.36
791	45	051	01248005	Horry	895.167
792	45	051	01248005	Horry	895.106
793	45	013	01247984	Beaufort	14856.3
794	45	013	01247984	Beaufort	11215.5
795	45	051	01248005	Horry	12225.1
796	45	051	01248005	Horry	12224.9
797	45	019	01252740	Charleston	8066.12
798	45	043	01248002	Georgetown	2419.72
799	45	051	01248005	Horry	894.686
800	45	043	01248002	Georgetown	2420.23
801	45	051	01248005	Horry	12232.2
802	45	051	01248005	Horry	2397.74
803	45	019	01252740	Charleston	18657.8
804	45	015	01247985	Berkeley	29248.2
805	45	051	01248005	Horry	899.575
806	45	035	01247998	Dorchester	33563.4
807	45	051	01248005	Horry	7022.33
808	45	051	01248005	Horry	12226.2
809	45	051	01248005	Horry	12228.1
810	45	015	01247985	Berkeley	27606.5
811	45	051	01248005	Horry	12218.2
812	45	051	01248005	Horry	6386.61
813	45	019	01252740	Charleston	8063.18
814	45	051	01248005	Horry	6384.54
815	45	051	01248005	Horry	12226.2
816	45	013	01247984	Beaufort	13369.4
817	45	051	01248005	Horry	895.986
818	45	013	01247984	Beaufort	13369.7
819	45	051	01248005	Horry	912.342
820	45	015	01247985	Berkeley	27606.7
821	45	019	01252740	Charleston	6695.46
822	45	019	01252740	Charleston	8067.08
823	45	019	01252740	Charleston	18658.4
824	45	051	01248005	Horry	12227.5
825	45	019	01252740	Charleston	18657.2
826	45	019	01252740	Charleston	8070.05
827	45	019	01252740	Charleston	23573.8
828	45	013	01247984	Beaufort	14853.6
829	45	051	01248005	Horry	1372.65
830	45	019	01252740	Charleston	18659.1
831	45	013	01247984	Beaufort	14852.9
832	45	051	01248005	Horry	12229.9
833	45	019	01252740	Charleston	8066.9
834	45	015	01247985	Berkeley	44554.2
835	45	051	01248005	Horry	12226.7
836	45	051	01248005	Horry	6390.1
837	45	019	01252740	Charleston	14127.5
838	45	051	01248005	Horry	6385.8
839	45	051	01248005	Horry	894.686
840	45	019	01252740	Charleston	8064.75
841	45	051	01248005	Horry	897.455
842	45	015	01247985	Berkeley	27604.6
843	45	019	01252740	Charleston	18657.9
844	45	019	01252740	Charleston	8066.93
845	45	019	01252740	Charleston	18657.2
846	45	019	01252740	Charleston	3088.04
847	45	013	01247984	Beaufort	3960.32
848	45	019	01252740	Charleston	7479.33
849	45	051	01248005	Horry	12219.6
850	45	015	01247985	Berkeley	27606
851	45	051	01248005	Horry	12221.6
852	45	053	01248006	Jasper	23868.7
853	45	013	01247984	Beaufort	14856
854	45	019	01252740	Charleston	18658.1
855	45	051	01248005	Horry	6385.92
856	45	051	01248005	Horry	1373.45
857	45	019	01252740	Charleston	1461.33
858	45	051	01248005	Horry	12226.7
859	45	043	01248002	Georgetown	2667.05
860	45	013	01247984	Beaufort	9537.16
861	45	019	01252740	Charleston	18657.2
862	45	051	01248005	Horry	5669.05
863	45	035	01247998	Dorchester	33873.5
864	45	051	01248005	Horry	1371.71
865	45	019	01252740	Charleston	18658.6
866	45	015	01247985	Berkeley	27606.7
867	45	035	01247998	Dorchester	33585.9
868	45	019	01252740	Charleston	18653.4
869	45	035	01247998	Dorchester	33592.4
870	45	051	01248005	Horry	12226.9
871	45	013	01247984	Beaufort	14828.1
872	45	015	01247985	Berkeley	18733.5
873	45	051	01248005	Horry	12237.8
874	45	051	01248005	Horry	2386.61
875	45	019	01252740	Charleston	7464.84
876	45	019	01252740	Charleston	18656.2
877	45	013	01247984	Beaufort	14859.6
878	45	051	01248005	Horry	895.213
879	45	051	01248005	Horry	897.874
880	45	051	01248005	Horry	7524.28
881	45	051	01248005	Horry	12226
882	45	035	01247998	Dorchester	33589.3
883	45	019	01252740	Charleston	18671.9
884	45	019	01252740	Charleston	8066.25
885	45	043	01248002	Georgetown	13844.1
886	45	013	01247984	Beaufort	14856.7
887	45	051	01248005	Horry	12248.3
888	45	051	01248005	Horry	900.186
889	45	051	01248005	Horry	2391.39
890	45	051	01248005	Horry	12226.1
891	45	051	01248005	Horry	2392.31
892	45	051	01248005	Horry	250.098
893	45	035	01247998	Dorchester	33593.2
894	45	051	01248005	Horry	6374.76
895	45	019	01252740	Charleston	18659.8
896	45	051	01248005	Horry	12232.1
897	45	051	01248005	Horry	12227
898	45	051	01248005	Horry	898.385
899	45	019	01252740	Charleston	18622.9
900	45	019	01252740	Charleston	18657.8
901	45	019	01252740	Charleston	18657.4
902	45	019	01252740	Charleston	18637.4
903	45	019	01252740	Charleston	8070.3
904	45	019	01252740	Charleston	8071.5
905	45	051	01248005	Horry	6385.53
906	45	019	01252740	Charleston	18658.4
907	45	015	01247985	Berkeley	27607.9
908	45	051	01248005	Horry	7008.14
909	45	051	01248005	Horry	12227.8
910	45	015	01247985	Berkeley	27610.7
911	45	051	01248005	Horry	12237
912	45	019	01252740	Charleston	18657.2
913	45	019	01252740	Charleston	18657.6
914	45	051	01248005	Horry	12226.7
915	45	051	01248005	Horry	16041.8
916	45	019	01252740	Charleston	8069.67
917	45	013	01247984	Beaufort	3965.76
918	45	051	01248005	Horry	12232.7
919	45	051	01248005	Horry	23306.9
920	45	051	01248005	Horry	7520.94
921	45	051	01248005	Horry	15670.3
922	45	019	01252740	Charleston	18659.6
923	45	019	01252740	Charleston	18656.8
924	45	051	01248005	Horry	12225.8
925	45	015	01247985	Berkeley	18562.6
926	45	051	01248005	Horry	7521.55
927	45	051	01248005	Horry	897.691
928	45	015	01247985	Berkeley	33313
929	45	019	01252740	Charleston	614.269
930	45	051	01248005	Horry	12226.8
931	45	051	01248005	Horry	12239
932	45	015	01247985	Berkeley	27606.1
933	45	019	01252740	Charleston	7458.79
934	45	043	01248002	Georgetown	1692.3
935	45	019	01252740	Charleston	15763.7
936	45	019	01252740	Charleston	8066.66
937	45	013	01247984	Beaufort	11235.3
938	45	051	01248005	Horry	12227.5
939	45	019	01252740	Charleston	8065.67
940	45	019	01252740	Charleston	8067
941	45	051	01248005	Horry	12221
942	45	051	01248005	Horry	12224.3
943	45	051	01248005	Horry	1373.5
944	45	051	01248005	Horry	12223.5
945	45	051	01248005	Horry	12226.3
946	45	019	01252740	Charleston	18657.2
947	45	051	01248005	Horry	2422.28
948	45	019	01252740	Charleston	8062.07
949	45	051	01248005	Horry	12227.5
950	45	015	01247985	Berkeley	27607.2
951	45	051	01248005	Horry	6384.75
952	45	051	01248005	Horry	11162.4
953	45	051	01248005	Horry	896.733
954	45	019	01252740	Charleston	12744.8
955	45	019	01252740	Charleston	184.82
956	45	051	01248005	Horry	895.501
957	45	015	01247985	Berkeley	30955.9
958	45	015	01247985	Berkeley	18739.7
959	45	015	01247985	Berkeley	21167.2
960	45	015	01247985	Berkeley	18738
961	45	019	01252740	Charleston	796.689
962	45	051	01248005	Horry	12225.3
963	45	051	01248005	Horry	1382.05
964	45	051	01248005	Horry	896.881
965	45	051	01248005	Horry	6386.4
966	45	051	01248005	Horry	12225.8
967	45	035	01247998	Dorchester	33585.8
968	45	019	01252740	Charleston	11470.8
969	45	051	01248005	Horry	12222
970	45	019	01252740	Charleston	18657.7
971	45	035	01247998	Dorchester	33566.2
972	45	019	01252740	Charleston	8063.3
973	45	015	01247985	Berkeley	27606.2
974	45	043	01248002	Georgetown	13850.3
975	45	019	01252740	Charleston	18657.1
976	45	035	01247998	Dorchester	33591.8
977	45	015	01247985	Berkeley	27604.7
978	45	051	01248005	Horry	12225.2
979	45	029	01247991	Colleton	42635.7
980	45	051	01248005	Horry	903.045
981	45	013	01247984	Beaufort	14847.1
982	45	051	01248005	Horry	12237.3
983	45	051	01248005	Horry	6383.7
984	45	051	01248005	Horry	12231.4
985	45	015	01247985	Berkeley	18739
986	45	051	01248005	Horry	12226.7
987	45	051	01248005	Horry	914.257
988	45	051	01248005	Horry	12226.5
989	45	019	01252740	Charleston	17902.3
990	45	019	01252740	Charleston	355.931
991	45	035	01247998	Dorchester	33590.7
992	45	051	01248005	Horry	899.663
993	45	051	01248005	Horry	12229.3
994	45	051	01248005	Horry	907.171
995	45	015	01247985	Berkeley	27604.8
996	45	051	01248005	Horry	12223.8
997	45	035	01247998	Dorchester	33590.1
998	45	051	01248005	Horry	12221.3
999	45	015	01247985	Berkeley	27605.8
1000	45	051	01248005	Horry	12225.5
1001	45	051	01248005	Horry	897.996
1002	45	019	01252740	Charleston	8067.26
1003	45	051	01248005	Horry	12228.1
1004	45	019	01252740	Charleston	8398.84
1005	45	051	01248005	Horry	903.948
1006	45	019	01252740	Charleston	18660.6
1007	45	043	01248002	Georgetown	229.428
1008	45	019	01252740	Charleston	8087.2
1009	45	051	01248005	Horry	25651.2
1010	45	051	01248005	Horry	17333.2
1011	45	019	01252740	Charleston	18659.2
1012	45	051	01248005	Horry	3026.14
1013	45	051	01248005	Horry	2391.17
1014	45	019	01252740	Charleston	356.63
1015	45	051	01248005	Horry	896.819
1016	45	019	01252740	Charleston	8066.25
1017	45	019	01252740	Charleston	8068.52
1018	45	013	01247984	Beaufort	6790.31
1019	45	051	01248005	Horry	12226.9
1020	45	015	01247985	Berkeley	27607.7
1021	45	051	01248005	Horry	6385.21
1022	45	013	01247984	Beaufort	13374.7
1023	45	015	01247985	Berkeley	18740.6
1024	45	051	01248005	Horry	25660.1
1025	45	051	01248005	Horry	12220
1026	45	043	01248002	Georgetown	2419.01
1027	45	051	01248005	Horry	896.781
1028	45	029	01247991	Colleton	49275.8
1029	45	015	01247985	Berkeley	18738.7
1030	45	019	01252740	Charleston	8049.63
1031	45	051	01248005	Horry	12227.2
1032	45	019	01252740	Charleston	159.981
1033	45	043	01248002	Georgetown	39392.2
1034	45	019	01252740	Charleston	18667.2
1035	45	051	01248005	Horry	12244.4
1036	45	051	01248005	Horry	894.885
1037	45	051	01248005	Horry	12225.3
1038	45	051	01248005	Horry	12224
1039	45	051	01248005	Horry	12226.7
1040	45	019	01252740	Charleston	8070.82
1041	45	051	01248005	Horry	12233.6
1042	45	019	01252740	Charleston	18657.2
1043	45	013	01247984	Beaufort	14855.5
1044	45	013	01247984	Beaufort	5182.02
1045	45	051	01248005	Horry	6298.17
1046	45	051	01248005	Horry	900.788
1047	45	051	01248005	Horry	12225.3
1048	45	051	01248005	Horry	22977.4
1049	45	051	01248005	Horry	901.401
1050	45	019	01252740	Charleston	18661.6
1051	45	019	01252740	Charleston	18660.2
1052	45	019	01252740	Charleston	8067.81
1053	45	043	01248002	Georgetown	39371.5
1054	45	019	01252740	Charleston	2200.86
1055	45	051	01248005	Horry	902.231
1056	45	015	01247985	Berkeley	18741.5
1057	45	019	01252740	Charleston	7569.82
1058	45	051	01248005	Horry	12209.1
1059	45	051	01248005	Horry	12227.7
1060	45	015	01247985	Berkeley	18739.3
1061	45	015	01247985	Berkeley	30954.5
1062	45	019	01252740	Charleston	8068.15
1063	45	015	01247985	Berkeley	27606.1
1064	45	051	01248005	Horry	12226.3
1065	45	043	01248002	Georgetown	2665.03
1066	45	051	01248005	Horry	12227.4
1067	45	051	01248005	Horry	24064.4
1068	45	051	01248005	Horry	12225.6
1069	45	051	01248005	Horry	12230.1
1070	45	051	01248005	Horry	12226.8
1071	45	015	01247985	Berkeley	18737.8
1072	45	019	01252740	Charleston	18663.1
1073	45	051	01248005	Horry	7523.34
1074	45	019	01252740	Charleston	18657.8
1075	45	051	01248005	Horry	3870.45
1076	45	053	01248006	Jasper	29045.6
1077	45	019	01252740	Charleston	18699.9
1078	45	013	01247984	Beaufort	14852.7
1079	45	051	01248005	Horry	900.188
1080	45	019	01252740	Charleston	2214.09
1081	45	013	01247984	Beaufort	11233.3
1082	45	051	01248005	Horry	25658.8
1083	45	051	01248005	Horry	12226.7
1084	45	051	01248005	Horry	12233.9
1085	45	019	01252740	Charleston	18670.5
1086	45	019	01252740	Charleston	8066.42
1087	45	043	01248002	Georgetown	1512.16
1088	45	051	01248005	Horry	12232.5
1089	45	051	01248005	Horry	4132.14
1090	45	051	01248005	Horry	6368.33
1091	45	019	01252740	Charleston	18658.5
1092	45	051	01248005	Horry	12125.1
1093	45	035	01247998	Dorchester	33588.1
1094	45	019	01252740	Charleston	8066.89
1095	45	035	01247998	Dorchester	33591.8
1096	45	051	01248005	Horry	22038.2
1097	45	051	01248005	Horry	12227.8
1098	45	013	01247984	Beaufort	3964.33
1099	45	051	01248005	Horry	2396.03
1100	45	019	01252740	Charleston	18653.6
1101	45	015	01247985	Berkeley	33312.8
1102	45	019	01252740	Charleston	14453.4
1103	45	051	01248005	Horry	12229
1104	45	019	01252740	Charleston	18656.8
1105	45	019	01252740	Charleston	18660.5
1106	45	051	01248005	Horry	895.632
1107	45	051	01248005	Horry	894.686
1108	45	015	01247985	Berkeley	27611.1
1109	45	019	01252740	Charleston	18659.5
1110	45	051	01248005	Horry	12225.1
1111	45	051	01248005	Horry	12228.6
1112	45	013	01247984	Beaufort	14848.8
1113	45	013	01247984	Beaufort	13372.5
1114	45	019	01252740	Charleston	8067.58
1115	45	051	01248005	Horry	2391.18
1116	45	051	01248005	Horry	7010.68
1117	45	015	01247985	Berkeley	33312.6
1118	45	051	01248005	Horry	12227.7
1119	45	019	01252740	Charleston	18662.9
1120	45	051	01248005	Horry	6380.84
1121	45	035	01247998	Dorchester	33596
1122	45	051	01248005	Horry	12221.3
1123	45	051	01248005	Horry	12226.5
1124	45	015	01247985	Berkeley	18736.1
1125	45	051	01248005	Horry	895.731
1126	45	043	01248002	Georgetown	2420.5
1127	45	051	01248005	Horry	12229.9
1128	45	051	01248005	Horry	12225.8
1129	45	051	01248005	Horry	897.502
1130	45	019	01252740	Charleston	18661.6
1131	45	019	01252740	Charleston	18657.9
1132	45	035	01247998	Dorchester	33577.5
1133	45	013	01247984	Beaufort	14854.8
1134	45	051	01248005	Horry	2392.19
1135	45	019	01252740	Charleston	1637.8
1136	45	051	01248005	Horry	12226
1137	45	019	01252740	Charleston	18669.3
1138	45	019	01252740	Charleston	18659.4
1139	45	019	01252740	Charleston	7471.66
1140	45	015	01247985	Berkeley	27609.2
1141	45	019	01252740	Charleston	18649
1142	45	051	01248005	Horry	2390.99
1143	45	051	01248005	Horry	12222.1
1144	45	019	01252740	Charleston	8067.93
1145	45	051	01248005	Horry	3076
1146	45	051	01248005	Horry	12224.9
1147	45	051	01248005	Horry	12224.4
1148	45	015	01247985	Berkeley	44426.5
1149	45	051	01248005	Horry	898.448
1150	45	043	01248002	Georgetown	39398.4
1151	45	051	01248005	Horry	1364.68
1152	45	051	01248005	Horry	536.767
1153	45	051	01248005	Horry	2390.78
1154	45	051	01248005	Horry	12224.4
1155	45	051	01248005	Horry	811.707
1156	45	043	01248002	Georgetown	2668.65
1157	45	051	01248005	Horry	12227
1158	45	051	01248005	Horry	12223.2
1159	45	015	01247985	Berkeley	33930.6
1160	45	013	01247984	Beaufort	13372.1
1161	45	053	01248006	Jasper	16311.2
1162	45	035	01247998	Dorchester	33585.4
1163	45	051	01248005	Horry	897.405
1164	45	051	01248005	Horry	25656.2
1165	45	019	01252740	Charleston	18657.5
1166	45	019	01252740	Charleston	18665
1167	45	015	01247985	Berkeley	20330.1
1168	45	051	01248005	Horry	12292
1169	45	051	01248005	Horry	12226.4
1170	45	051	01248005	Horry	12226.2
1171	45	051	01248005	Horry	12226.3
1172	45	015	01247985	Berkeley	27606.4
1173	45	015	01247985	Berkeley	27543.2
1174	45	051	01248005	Horry	12227.2
1175	45	015	01247985	Berkeley	30957.6
1176	45	051	01248005	Horry	1743.98
1177	45	051	01248005	Horry	894.879
1178	45	019	01252740	Charleston	18657.2
1179	45	035	01247998	Dorchester	33590.4
1180	45	051	01248005	Horry	12227.5
1181	45	051	01248005	Horry	12226.8
1182	45	013	01247984	Beaufort	14859.4
1183	45	051	01248005	Horry	894.641
1184	45	051	01248005	Horry	12227
1185	45	013	01247984	Beaufort	138.533
1186	45	013	01247984	Beaufort	434.942
1187	45	019	01252740	Charleston	8066.22
1188	45	043	01248002	Georgetown	13843.3
1189	45	043	01248002	Georgetown	2423.19
1190	45	051	01248005	Horry	6386.4
1191	45	019	01252740	Charleston	8069.12
1192	45	019	01252740	Charleston	8105.26
1193	45	043	01248002	Georgetown	39394.2
1194	45	051	01248005	Horry	904.295
1195	45	051	01248005	Horry	901.315
1196	45	051	01248005	Horry	1372.29
1197	45	051	01248005	Horry	12221.6
1198	45	051	01248005	Horry	27309.3
1199	45	051	01248005	Horry	12230.6
1200	45	035	01247998	Dorchester	33589.8
1201	45	019	01252740	Charleston	14754.3
1202	45	019	01252740	Charleston	8065.91
1203	45	051	01248005	Horry	6392.11
1204	45	051	01248005	Horry	18572.1
1205	45	051	01248005	Horry	12232.6
1206	45	035	01247998	Dorchester	33594.1
1207	45	051	01248005	Horry	2581.52
1208	45	051	01248005	Horry	917.324
1209	45	013	01247984	Beaufort	13367.3
1210	45	013	01247984	Beaufort	14855
1211	45	051	01248005	Horry	2393.33
1212	45	051	01248005	Horry	12819.7
1213	45	015	01247985	Berkeley	27605.7
1214	45	051	01248005	Horry	6323.18
1215	45	051	01248005	Horry	899.908
1216	45	051	01248005	Horry	12230.9
1217	45	053	01248006	Jasper	28487
1218	45	019	01252740	Charleston	18660.6
1219	45	051	01248005	Horry	8540.49
1220	45	013	01247984	Beaufort	8292.69
1221	45	015	01247985	Berkeley	27606.8
1222	45	015	01247985	Berkeley	18734.4
1223	45	043	01248002	Georgetown	2664
1224	45	019	01252740	Charleston	8066.57
1225	45	035	01247998	Dorchester	33579.4
1226	45	019	01252740	Charleston	18657.2
1227	45	019	01252740	Charleston	18658.2
1228	45	019	01252740	Charleston	8054.47
1229	45	051	01248005	Horry	906.746
1230	45	019	01252740	Charleston	18658.6
1231	45	035	01247998	Dorchester	34920.8
1232	45	051	01248005	Horry	898.254
1233	45	015	01247985	Berkeley	18741.7
1234	45	035	01247998	Dorchester	33591.8
1235	45	013	01247984	Beaufort	14868.5
1236	45	051	01248005	Horry	25626.5
1237	45	051	01248005	Horry	12222.2
1238	45	051	01248005	Horry	12227.1
1239	45	051	01248005	Horry	12232.2
1240	45	013	01247984	Beaufort	3963.52
1241	45	051	01248005	Horry	12234.4
1242	45	051	01248005	Horry	17362.6
1243	45	051	01248005	Horry	897.075
1244	45	051	01248005	Horry	2390.49
1245	45	013	01247984	Beaufort	11226.1
1246	45	051	01248005	Horry	894.732
1247	45	015	01247985	Berkeley	18739.2
1248	45	019	01252740	Charleston	7472.44
1249	45	051	01248005	Horry	12216.4
1250	45	035	01247998	Dorchester	34913.7
1251	45	051	01248005	Horry	25659.6
1252	45	051	01248005	Horry	2391.16
1253	45	015	01247985	Berkeley	27606.1
1254	45	013	01247984	Beaufort	3960.83
1255	45	051	01248005	Horry	12235.2
1256	45	015	01247985	Berkeley	44428.5
1257	45	051	01248005	Horry	12227.3
1258	45	051	01248005	Horry	12224.7
1259	45	051	01248005	Horry	4133.69
1260	45	019	01252740	Charleston	18669.5
1261	45	051	01248005	Horry	897.824
1262	45	051	01248005	Horry	25655.9
1263	45	051	01248005	Horry	12771.7
1264	45	051	01248005	Horry	12253.5
1265	45	015	01247985	Berkeley	27601.7
1266	45	051	01248005	Horry	895.002
1267	45	051	01248005	Horry	12226.7
1268	45	019	01252740	Charleston	18687.3
1269	45	015	01247985	Berkeley	33308.2
1270	45	015	01247985	Berkeley	18554.8
1271	45	019	01252740	Charleston	18658.7
1272	45	051	01248005	Horry	7524.71
1273	45	043	01248002	Georgetown	13846.4
1274	45	013	01247984	Beaufort	3981.38
1275	45	051	01248005	Horry	17369.2
1276	45	051	01248005	Horry	895.371
1277	45	051	01248005	Horry	12222
1278	45	019	01252740	Charleston	8066.94
1279	45	051	01248005	Horry	12229.4
1280	45	019	01252740	Charleston	18659.5
1281	45	015	01247985	Berkeley	15024.8
1282	45	051	01248005	Horry	12226.5
1283	45	051	01248005	Horry	12227.8
1284	45	051	01248005	Horry	12226.4
1285	45	019	01252740	Charleston	8064.54
1286	45	013	01247984	Beaufort	14852.9
1287	45	019	01252740	Charleston	8066.14
1288	45	051	01248005	Horry	895.395
1289	45	019	01252740	Charleston	8067.02
1290	45	019	01252740	Charleston	18656.1
1291	45	051	01248005	Horry	8725.94
1292	45	019	01252740	Charleston	18630.7
1293	45	019	01252740	Charleston	8067.14
1294	45	051	01248005	Horry	1370.66
1295	45	051	01248005	Horry	9023.39
1296	45	013	01247984	Beaufort	6781.23
1297	45	019	01252740	Charleston	18660.9
1298	45	019	01252740	Charleston	8067.62
1299	45	051	01248005	Horry	896.929
1300	45	051	01248005	Horry	12226.8
1301	45	051	01248005	Horry	12213.5
1302	45	051	01248005	Horry	12226.3
1303	45	051	01248005	Horry	5430.57
1304	45	051	01248005	Horry	898.057
1305	45	019	01252740	Charleston	18654.4
1306	45	015	01247985	Berkeley	30957.6
1307	45	051	01248005	Horry	6385.07
1308	45	051	01248005	Horry	12227.1
1309	45	015	01247985	Berkeley	33312.2
1310	45	019	01252740	Charleston	18658.1
1311	45	051	01248005	Horry	12224.7
1312	45	051	01248005	Horry	7521.93
1313	45	051	01248005	Horry	12223.3
1314	45	051	01248005	Horry	12227.4
1315	45	051	01248005	Horry	6725.44
1316	45	051	01248005	Horry	12227.5
1317	45	019	01252740	Charleston	18657.4
1318	45	051	01248005	Horry	25660.3
1319	45	019	01252740	Charleston	18660.4
1320	45	051	01248005	Horry	898.898
1321	45	043	01248002	Georgetown	2667.3
1322	45	043	01248002	Georgetown	2665.64
1323	45	015	01247985	Berkeley	18739.6
1324	45	035	01247998	Dorchester	33588
1325	45	035	01247998	Dorchester	33595.3
1326	45	051	01248005	Horry	899.507
1327	45	015	01247985	Berkeley	44431.1
1328	45	019	01252740	Charleston	7462.89
1329	45	035	01247998	Dorchester	33611.2
1330	45	043	01248002	Georgetown	13849.5
1331	45	035	01247998	Dorchester	33590.7
1332	45	051	01248005	Horry	12487.4
1333	45	013	01247984	Beaufort	14856.6
1334	45	051	01248005	Horry	2390.99
1335	45	051	01248005	Horry	6385.08
1336	45	035	01247998	Dorchester	33591.5
1337	45	051	01248005	Horry	896.277
1338	45	043	01248002	Georgetown	13843.5
1339	45	015	01247985	Berkeley	18735.6
1340	45	013	01247984	Beaufort	11217.7
1341	45	051	01248005	Horry	12227
1342	45	019	01252740	Charleston	7124.7
1343	45	051	01248005	Horry	6326.31
1344	45	051	01248005	Horry	1373
1345	45	051	01248005	Horry	2392.28
1346	45	015	01247985	Berkeley	44427
1347	45	019	01252740	Charleston	190.293
1348	45	015	01247985	Berkeley	44426.7
1349	45	051	01248005	Horry	898.368
1350	45	019	01252740	Charleston	1221.21
1351	45	019	01252740	Charleston	8067.13
1352	45	051	01248005	Horry	900.757
1353	45	051	01248005	Horry	12236
1354	45	019	01252740	Charleston	18653.8
1355	45	051	01248005	Horry	896.951
1356	45	051	01248005	Horry	12227.6
1357	45	019	01252740	Charleston	18663.3
1358	45	051	01248005	Horry	6388.24
1359	45	013	01247984	Beaufort	13372.6
1360	45	029	01247991	Colleton	49275.5
1361	45	015	01247985	Berkeley	44410
1362	45	019	01252740	Charleston	8066.68
1363	45	019	01252740	Charleston	18655.1
1364	45	013	01247984	Beaufort	14858.8
1365	45	019	01252740	Charleston	8066.93
1366	45	051	01248005	Horry	896.024
1367	45	051	01248005	Horry	4133.97
1368	45	019	01252740	Charleston	8066.78
1369	45	019	01252740	Charleston	18657
1370	45	019	01252740	Charleston	18663.8
1371	45	019	01252740	Charleston	7469.18
1372	45	051	01248005	Horry	895.016
1373	45	043	01248002	Georgetown	39398.3
1374	45	019	01252740	Charleston	8067.18
1375	45	015	01247985	Berkeley	44428.1
1376	45	051	01248005	Horry	899.096
1377	45	051	01248005	Horry	12229.5
1378	45	043	01248002	Georgetown	39396.6
1379	45	019	01252740	Charleston	18657.2
1380	45	051	01248005	Horry	12227.2
1381	45	051	01248005	Horry	895.483
1382	45	015	01247985	Berkeley	27606.6
1383	45	051	01248005	Horry	2391.48
1384	45	013	01247984	Beaufort	11231.3

## Sheet: Post-evacuation-evacuated
id	STATEFP	COUNTYFP	COUNTYNS	NAME	DIST_DIFF	Conglomerate
1	45	013	01247984	Beaufort	2.56618	Southern conglomerate
2	45	013	01247984	Beaufort	2.15835	Southern conglomerate
3	45	051	01248005	Horry	2.45719	Northern conglomerate
4	45	051	01248005	Horry	4.98416	Northern conglomerate
5	45	051	01248005	Horry	3.55435	Northern conglomerate
6	45	051	01248005	Horry	0.969754	Northern conglomerate
7	45	051	01248005	Horry	1.23306	Northern conglomerate
8	45	019	01252740	Charleston	2.28526	Central conglomerate
9	45	035	01247998	Dorchester	1.86004	Central conglomerate
10	45	013	01247984	Beaufort	3.62481	Southern conglomerate
11	45	019	01252740	Charleston	2.83297	Central conglomerate
12	45	019	01252740	Charleston	5.5018	Central conglomerate
13	45	035	01247998	Dorchester	1.23347	Central conglomerate
14	45	051	01248005	Horry	0.585366	Northern conglomerate
15	45	015	01247985	Berkeley	1.0483	Central conglomerate
16	45	051	01248005	Horry	7.04213	Northern conglomerate
17	45	019	01252740	Charleston	8.76798	Central conglomerate
18	45	051	01248005	Horry	4.83291	Northern conglomerate
19	45	013	01247984	Beaufort	2.78536	Southern conglomerate
20	45	051	01248005	Horry	4.97847	Northern conglomerate
21	45	013	01247984	Beaufort	3.77873	Southern conglomerate
22	45	019	01252740	Charleston	1.04117	Central conglomerate
23	45	019	01252740	Charleston	6.87458	Central conglomerate
24	45	051	01248005	Horry	2.30878	Northern conglomerate
25	45	051	01248005	Horry	1.21799	Northern conglomerate
26	45	051	01248005	Horry	0.866055	Northern conglomerate
27	45	051	01248005	Horry	2.78749	Northern conglomerate
28	45	015	01247985	Berkeley	2.74962	Central conglomerate
29	45	051	01248005	Horry	1.10175	Northern conglomerate
30	45	019	01252740	Charleston	11.1648	Central conglomerate
31	45	015	01247985	Berkeley	3.52732	Central conglomerate
32	45	013	01247984	Beaufort	2.53915	Southern conglomerate
33	45	051	01248005	Horry	10.5609	Northern conglomerate
34	45	053	01248006	Jasper	1.98581	Southern conglomerate
35	45	019	01252740	Charleston	3.39606	Central conglomerate
36	45	019	01252740	Charleston	2.43075	Central conglomerate
37	45	019	01252740	Charleston	1.33239	Central conglomerate
38	45	051	01248005	Horry	4.10682	Northern conglomerate
39	45	019	01252740	Charleston	2.35254	Central conglomerate
40	45	051	01248005	Horry	1.10196	Northern conglomerate
41	45	051	01248005	Horry	7.70171	Northern conglomerate
42	45	051	01248005	Horry	1.93079	Northern conglomerate
43	45	019	01252740	Charleston	1.04125	Central conglomerate
44	45	051	01248005	Horry	1.75776	Northern conglomerate
45	45	051	01248005	Horry	1.15928	Northern conglomerate
46	45	051	01248005	Horry	0.969717	Northern conglomerate
47	45	051	01248005	Horry	1.10174	Northern conglomerate
48	45	043	01248002	Georgetown	0.838768	Northern conglomerate
49	45	051	01248005	Horry	6.93511	Northern conglomerate
50	45	051	01248005	Horry	2.97432	Northern conglomerate
51	45	035	01247998	Dorchester	2.03469	Central conglomerate
52	45	051	01248005	Horry	1.10174	Northern conglomerate
53	45	019	01252740	Charleston	1.04094	Central conglomerate
54	45	051	01248005	Horry	13.5813	Northern conglomerate
55	45	013	01247984	Beaufort	4.07085	Southern conglomerate
56	45	051	01248005	Horry	5.17673	Northern conglomerate
57	45	051	01248005	Horry	1.67766	Northern conglomerate
58	45	051	01248005	Horry	2.85576	Northern conglomerate
59	45	019	01252740	Charleston	6.9795	Central conglomerate
60	45	015	01247985	Berkeley	1.04829	Central conglomerate
61	45	019	01252740	Charleston	1.71293	Central conglomerate
62	45	019	01252740	Charleston	2.15118	Central conglomerate
63	45	013	01247984	Beaufort	3.77152	Southern conglomerate
64	45	051	01248005	Horry	5.13662	Northern conglomerate
65	45	051	01248005	Horry	10.299	Northern conglomerate
66	45	019	01252740	Charleston	2.01048	Central conglomerate
67	45	019	01252740	Charleston	3.38023	Central conglomerate
68	45	019	01252740	Charleston	1.78977	Central conglomerate
69	45	035	01247998	Dorchester	1.7909	Central conglomerate
70	45	035	01247998	Dorchester	1.61705	Central conglomerate
71	45	019	01252740	Charleston	2.77306	Central conglomerate
72	45	051	01248005	Horry	1.20904	Northern conglomerate
73	45	051	01248005	Horry	2.34847	Northern conglomerate
74	45	051	01248005	Horry	2.34592	Northern conglomerate
75	45	051	01248005	Horry	8.90587	Northern conglomerate
76	45	051	01248005	Horry	1.10219	Northern conglomerate
77	45	035	01247998	Dorchester	6.43966	Central conglomerate
78	45	013	01247984	Beaufort	30.7642	Southern conglomerate
79	45	051	01248005	Horry	2.84548	Northern conglomerate
80	45	051	01248005	Horry	2.48857	Northern conglomerate
81	45	035	01247998	Dorchester	1.85997	Central conglomerate
82	45	051	01248005	Horry	10.5348	Northern conglomerate
83	45	051	01248005	Horry	1.1017	Northern conglomerate
84	45	035	01247998	Dorchester	0.890896	Central conglomerate
85	45	051	01248005	Horry	0.881101	Northern conglomerate
86	45	035	01247998	Dorchester	0.885784	Central conglomerate
87	45	013	01247984	Beaufort	2.97453	Southern conglomerate
88	45	051	01248005	Horry	6.90149	Northern conglomerate
89	45	019	01252740	Charleston	3.56202	Central conglomerate
90	45	051	01248005	Horry	12.1023	Northern conglomerate
91	45	019	01252740	Charleston	1.67583	Central conglomerate
92	45	035	01247998	Dorchester	0.890662	Central conglomerate
93	45	035	01247998	Dorchester	3.89581	Central conglomerate
94	45	013	01247984	Beaufort	1.18049	Southern conglomerate
95	45	035	01247998	Dorchester	0.89074	Central conglomerate
96	45	051	01248005	Horry	1.10187	Northern conglomerate
97	45	035	01247998	Dorchester	4.20276	Central conglomerate
98	45	015	01247985	Berkeley	7.15774	Central conglomerate
99	45	051	01248005	Horry	1.10167	Northern conglomerate
100	45	051	01248005	Horry	1.10176	Northern conglomerate
101	45	019	01252740	Charleston	2.38959	Central conglomerate
102	45	013	01247984	Beaufort	1.50038	Southern conglomerate
103	45	019	01252740	Charleston	2.88358	Central conglomerate
104	45	051	01248005	Horry	6.43653	Northern conglomerate
105	45	019	01252740	Charleston	1.76377	Central conglomerate
106	45	019	01252740	Charleston	1.04112	Central conglomerate
107	45	013	01247984	Beaufort	3.9653	Southern conglomerate
108	45	051	01248005	Horry	7.71386	Northern conglomerate
109	45	053	01248006	Jasper	1.96605	Southern conglomerate
110	45	015	01247985	Berkeley	2.38617	Central conglomerate
111	45	053	01248006	Jasper	0.935662	Southern conglomerate
112	45	019	01252740	Charleston	3.1416	Central conglomerate
113	45	019	01252740	Charleston	3.10654	Central conglomerate
114	45	051	01248005	Horry	7.80483	Northern conglomerate
115	45	051	01248005	Horry	0.969736	Northern conglomerate
116	45	051	01248005	Horry	1.21306	Northern conglomerate
117	45	019	01252740	Charleston	1.1462	Central conglomerate
118	45	051	01248005	Horry	1.14805	Northern conglomerate
119	45	051	01248005	Horry	2.3459	Northern conglomerate
120	45	051	01248005	Horry	1.10174	Northern conglomerate
121	45	051	01248005	Horry	1.10172	Northern conglomerate
122	45	013	01247984	Beaufort	1.16051	Southern conglomerate
123	45	013	01247984	Beaufort	3.79983	Southern conglomerate
124	45	051	01248005	Horry	1.21307	Northern conglomerate
125	45	051	01248005	Horry	7.41123	Northern conglomerate
126	45	051	01248005	Horry	8.99969	Northern conglomerate
127	45	051	01248005	Horry	4.10686	Northern conglomerate
128	45	051	01248005	Horry	9.6288	Northern conglomerate
129	45	051	01248005	Horry	0.685862	Northern conglomerate
130	45	051	01248005	Horry	7.8758	Northern conglomerate
131	45	051	01248005	Horry	2.8742	Northern conglomerate
132	45	051	01248005	Horry	7.47444	Northern conglomerate
133	45	019	01252740	Charleston	1.21451	Central conglomerate
134	45	051	01248005	Horry	4.10684	Northern conglomerate
135	45	015	01247985	Berkeley	0.564415	Central conglomerate
136	45	035	01247998	Dorchester	0.654985	Central conglomerate
137	45	019	01252740	Charleston	2.39031	Central conglomerate
138	45	015	01247985	Berkeley	1.38675	Central conglomerate
139	45	051	01248005	Horry	7.33422	Northern conglomerate
140	45	051	01248005	Horry	1.1581	Northern conglomerate
141	45	051	01248005	Horry	6.98259	Northern conglomerate
142	45	015	01247985	Berkeley	24.9579	Central conglomerate
143	45	035	01247998	Dorchester	3.89577	Central conglomerate
144	45	051	01248005	Horry	4.71183	Northern conglomerate
145	45	051	01248005	Horry	3.03405	Northern conglomerate
146	45	051	01248005	Horry	5.56408	Northern conglomerate
147	45	019	01252740	Charleston	1.04107	Central conglomerate
148	45	019	01252740	Charleston	0.940707	Central conglomerate
149	45	019	01252740	Charleston	7.71126	Central conglomerate
150	45	051	01248005	Horry	1.2091	Northern conglomerate
151	45	051	01248005	Horry	2.34589	Northern conglomerate
152	45	019	01252740	Charleston	1.04094	Central conglomerate
153	45	043	01248002	Georgetown	0.803728	Northern conglomerate
154	45	035	01247998	Dorchester	2.68827	Central conglomerate
155	45	013	01247984	Beaufort	3.62886	Southern conglomerate
156	45	019	01252740	Charleston	2.01049	Central conglomerate
157	45	051	01248005	Horry	1.10174	Northern conglomerate
158	45	019	01252740	Charleston	3.45491	Central conglomerate
159	45	051	01248005	Horry	1.65036	Northern conglomerate
160	45	051	01248005	Horry	1.10191	Northern conglomerate
161	45	051	01248005	Horry	3.7038	Northern conglomerate
162	45	019	01252740	Charleston	1.14564	Central conglomerate
163	45	051	01248005	Horry	6.37976	Northern conglomerate
164	45	013	01247984	Beaufort	1.0657	Southern conglomerate
165	45	051	01248005	Horry	6.93513	Northern conglomerate
166	45	051	01248005	Horry	6.56334	Northern conglomerate
167	45	051	01248005	Horry	1.63659	Northern conglomerate
168	45	051	01248005	Horry	4.10685	Northern conglomerate
169	45	051	01248005	Horry	7.51904	Northern conglomerate
170	45	051	01248005	Horry	2.73346	Northern conglomerate
171	45	043	01248002	Georgetown	1.74552	Northern conglomerate
172	45	051	01248005	Horry	5.87886	Northern conglomerate
173	45	051	01248005	Horry	1.64652	Northern conglomerate
174	45	013	01247984	Beaufort	1.50998	Southern conglomerate
175	45	051	01248005	Horry	3.03408	Northern conglomerate
176	45	051	01248005	Horry	2.34562	Northern conglomerate
177	45	043	01248002	Georgetown	1.07437	Northern conglomerate
178	45	051	01248005	Horry	1.10173	Northern conglomerate
179	45	051	01248005	Horry	1.21303	Northern conglomerate
180	45	051	01248005	Horry	1.21158	Northern conglomerate
181	45	051	01248005	Horry	2.717	Northern conglomerate
182	45	013	01247984	Beaufort	2.03505	Southern conglomerate
183	45	051	01248005	Horry	15.9971	Northern conglomerate
184	45	053	01248006	Jasper	0.935639	Southern conglomerate
185	45	051	01248005	Horry	6.85266	Northern conglomerate
186	45	051	01248005	Horry	4.98371	Northern conglomerate
187	45	019	01252740	Charleston	2.11551	Central conglomerate
188	45	051	01248005	Horry	1.57234	Northern conglomerate
189	45	043	01248002	Georgetown	10.5276	Northern conglomerate
190	45	051	01248005	Horry	1.70678	Northern conglomerate
191	45	015	01247985	Berkeley	11.3998	Central conglomerate
192	45	051	01248005	Horry	2.91582	Northern conglomerate
193	45	019	01252740	Charleston	1.04117	Central conglomerate
194	45	013	01247984	Beaufort	2.09978	Southern conglomerate
195	45	051	01248005	Horry	1.10177	Northern conglomerate
196	45	019	01252740	Charleston	3.19655	Central conglomerate
197	45	051	01248005	Horry	1.10174	Northern conglomerate
198	45	051	01248005	Horry	6.29028	Northern conglomerate
199	45	051	01248005	Horry	1.70679	Northern conglomerate
200	45	019	01252740	Charleston	3.60619	Central conglomerate
201	45	051	01248005	Horry	1.21309	Northern conglomerate
202	45	015	01247985	Berkeley	0.965888	Central conglomerate
203	45	035	01247998	Dorchester	2.84279	Central conglomerate
204	45	013	01247984	Beaufort	3.31897	Southern conglomerate
205	45	015	01247985	Berkeley	2.73182	Central conglomerate
206	45	051	01248005	Horry	7.33427	Northern conglomerate
207	45	019	01252740	Charleston	1.4791	Central conglomerate
208	45	019	01252740	Charleston	2.11545	Central conglomerate
209	45	019	01252740	Charleston	3.55517	Central conglomerate
210	45	015	01247985	Berkeley	0.965923	Central conglomerate
211	45	019	01252740	Charleston	2.39528	Central conglomerate
212	45	015	01247985	Berkeley	0.965845	Central conglomerate
213	45	051	01248005	Horry	1.10176	Northern conglomerate
214	45	043	01248002	Georgetown	1.41867	Northern conglomerate
215	45	051	01248005	Horry	1.65043	Northern conglomerate
216	45	019	01252740	Charleston	1.25357	Central conglomerate
217	45	051	01248005	Horry	1.10174	Northern conglomerate
218	45	019	01252740	Charleston	4.91726	Central conglomerate
219	45	019	01252740	Charleston	1.0411	Central conglomerate
220	45	015	01247985	Berkeley	2.20998	Central conglomerate
221	45	013	01247984	Beaufort	1.67185	Southern conglomerate
222	45	051	01248005	Horry	1.10175	Northern conglomerate
223	45	051	01248005	Horry	1.73258	Northern conglomerate
224	45	051	01248005	Horry	11.2045	Northern conglomerate
225	45	051	01248005	Horry	2.26755	Northern conglomerate
226	45	013	01247984	Beaufort	1.06583	Southern conglomerate
227	45	019	01252740	Charleston	2.85471	Central conglomerate
228	45	035	01247998	Dorchester	0.890614	Central conglomerate
229	45	051	01248005	Horry	6.93513	Northern conglomerate
230	45	051	01248005	Horry	8.83522	Northern conglomerate
231	45	051	01248005	Horry	1.10183	Northern conglomerate
232	45	051	01248005	Horry	0.969774	Northern conglomerate
233	45	051	01248005	Horry	8.39133	Northern conglomerate
234	45	013	01247984	Beaufort	2.22846	Southern conglomerate
235	45	013	01247984	Beaufort	3.77772	Southern conglomerate
236	45	019	01252740	Charleston	1.15149	Central conglomerate
237	45	019	01252740	Charleston	1.7129	Central conglomerate
238	45	013	01247984	Beaufort	1.1822	Southern conglomerate
239	45	019	01252740	Charleston	6.68479	Central conglomerate
240	45	051	01248005	Horry	2.73363	Northern conglomerate
241	45	035	01247998	Dorchester	0.890662	Central conglomerate
242	45	051	01248005	Horry	2.69239	Northern conglomerate
243	45	015	01247985	Berkeley	3.49814	Central conglomerate
244	45	051	01248005	Horry	5.75019	Northern conglomerate
245	45	043	01248002	Georgetown	0.703066	Northern conglomerate
246	45	013	01247984	Beaufort	4.84058	Southern conglomerate
247	45	051	01248005	Horry	4.08288	Northern conglomerate
248	45	051	01248005	Horry	2.91586	Northern conglomerate
249	45	019	01252740	Charleston	3.81588	Central conglomerate
250	45	019	01252740	Charleston	1.46921	Central conglomerate
251	45	013	01247984	Beaufort	3.77411	Southern conglomerate
252	45	019	01252740	Charleston	1.0412	Central conglomerate
253	45	015	01247985	Berkeley	2.20842	Central conglomerate
254	45	051	01248005	Horry	0.734119	Northern conglomerate
255	45	051	01248005	Horry	2.07107	Northern conglomerate
256	45	051	01248005	Horry	9.40619	Northern conglomerate
257	45	043	01248002	Georgetown	1.68651	Northern conglomerate
258	45	051	01248005	Horry	2.55089	Northern conglomerate
259	45	015	01247985	Berkeley	0.800186	Central conglomerate
260	45	051	01248005	Horry	1.10178	Northern conglomerate
261	45	013	01247984	Beaufort	0.529531	Southern conglomerate
262	45	019	01252740	Charleston	2.01044	Central conglomerate
263	45	019	01252740	Charleston	3.77934	Central conglomerate
264	45	051	01248005	Horry	2.39476	Northern conglomerate
265	45	015	01247985	Berkeley	1.14521	Central conglomerate
266	45	019	01252740	Charleston	1.14612	Central conglomerate
267	45	019	01252740	Charleston	1.5899	Central conglomerate
268	45	051	01248005	Horry	1.57248	Northern conglomerate
269	45	013	01247984	Beaufort	3.36602	Southern conglomerate
270	45	051	01248005	Horry	5.49817	Northern conglomerate
271	45	051	01248005	Horry	1.21307	Northern conglomerate
272	45	015	01247985	Berkeley	1.32449	Central conglomerate
273	45	035	01247998	Dorchester	2.13484	Central conglomerate
274	45	019	01252740	Charleston	2.28528	Central conglomerate
275	45	051	01248005	Horry	1.15813	Northern conglomerate
276	45	015	01247985	Berkeley	4.94402	Central conglomerate
277	45	051	01248005	Horry	1.10173	Northern conglomerate
278	45	051	01248005	Horry	3.26729	Northern conglomerate
279	45	051	01248005	Horry	1.64642	Northern conglomerate
280	45	051	01248005	Horry	1.21264	Northern conglomerate
281	45	013	01247984	Beaufort	2.61941	Southern conglomerate
282	45	043	01248002	Georgetown	2.04376	Northern conglomerate
283	45	019	01252740	Charleston	3.12462	Central conglomerate
284	45	051	01248005	Horry	2.43237	Northern conglomerate
285	45	015	01247985	Berkeley	3.85149	Central conglomerate
286	45	051	01248005	Horry	1.22095	Northern conglomerate
287	45	015	01247985	Berkeley	3.25229	Central conglomerate
288	45	051	01248005	Horry	2.2446	Northern conglomerate
289	45	051	01248005	Horry	5.19109	Northern conglomerate
290	45	015	01247985	Berkeley	2.27174	Central conglomerate
291	45	051	01248005	Horry	2.83283	Northern conglomerate
292	45	051	01248005	Horry	1.19793	Northern conglomerate
293	45	051	01248005	Horry	2.40523	Northern conglomerate
294	45	051	01248005	Horry	1.10173	Northern conglomerate
295	45	019	01252740	Charleston	1.58986	Central conglomerate
296	45	013	01247984	Beaufort	1.0657	Southern conglomerate
297	45	013	01247984	Beaufort	1.1822	Southern conglomerate
298	45	051	01248005	Horry	3.03407	Northern conglomerate
299	45	019	01252740	Charleston	4.96512	Central conglomerate
300	45	051	01248005	Horry	4.38776	Northern conglomerate
301	45	051	01248005	Horry	1.60784	Northern conglomerate
302	45	019	01252740	Charleston	1.43064	Central conglomerate
303	45	013	01247984	Beaufort	3.73431	Southern conglomerate
304	45	051	01248005	Horry	2.7387	Northern conglomerate
305	45	051	01248005	Horry	1.90682	Northern conglomerate
306	45	051	01248005	Horry	1.10176	Northern conglomerate
307	45	019	01252740	Charleston	1.04154	Central conglomerate
308	45	013	01247984	Beaufort	2.67684	Southern conglomerate
309	45	051	01248005	Horry	1.10168	Northern conglomerate
310	45	051	01248005	Horry	7.6243	Northern conglomerate
311	45	051	01248005	Horry	1.10174	Northern conglomerate
312	45	051	01248005	Horry	2.32355	Northern conglomerate
313	45	051	01248005	Horry	2.76699	Northern conglomerate
314	45	051	01248005	Horry	3.13947	Northern conglomerate
315	45	013	01247984	Beaufort	3.67519	Southern conglomerate
316	45	019	01252740	Charleston	2.70619	Central conglomerate
317	45	015	01247985	Berkeley	0.965861	Central conglomerate
318	45	051	01248005	Horry	2.4396	Northern conglomerate
319	45	051	01248005	Horry	2.34585	Northern conglomerate
320	45	051	01248005	Horry	1.53953	Northern conglomerate
321	45	051	01248005	Horry	1.10173	Northern conglomerate
322	45	015	01247985	Berkeley	1.10584	Central conglomerate
323	45	015	01247985	Berkeley	1.93512	Central conglomerate
324	45	051	01248005	Horry	1.10164	Northern conglomerate
325	45	019	01252740	Charleston	1.09873	Central conglomerate
326	45	051	01248005	Horry	1.5663	Northern conglomerate
327	45	051	01248005	Horry	1.19795	Northern conglomerate
328	45	015	01247985	Berkeley	0.800106	Central conglomerate
329	45	019	01252740	Charleston	3.62178	Central conglomerate
330	45	019	01252740	Charleston	3.12461	Central conglomerate
331	45	051	01248005	Horry	1.21297	Northern conglomerate
332	45	043	01248002	Georgetown	1.04669	Northern conglomerate
333	45	051	01248005	Horry	1.73262	Northern conglomerate
334	45	051	01248005	Horry	4.10683	Northern conglomerate
335	45	051	01248005	Horry	1.10173	Northern conglomerate
336	45	019	01252740	Charleston	2.36797	Central conglomerate
337	45	051	01248005	Horry	7.15345	Northern conglomerate
338	45	051	01248005	Horry	6.42707	Northern conglomerate
339	45	051	01248005	Horry	7.3432	Northern conglomerate
340	45	051	01248005	Horry	8.7889	Northern conglomerate
341	45	013	01247984	Beaufort	7.12248	Southern conglomerate
342	45	015	01247985	Berkeley	2.26565	Central conglomerate
343	45	019	01252740	Charleston	1.97003	Central conglomerate
344	45	051	01248005	Horry	1.10167	Northern conglomerate
345	45	019	01252740	Charleston	3.74827	Central conglomerate
346	45	019	01252740	Charleston	2.78837	Central conglomerate
347	45	043	01248002	Georgetown	1.07445	Northern conglomerate
348	45	051	01248005	Horry	7.96163	Northern conglomerate
349	45	019	01252740	Charleston	1.04116	Central conglomerate
350	45	051	01248005	Horry	1.10173	Northern conglomerate
351	45	051	01248005	Horry	1.21303	Northern conglomerate
352	45	051	01248005	Horry	3.1582	Northern conglomerate
353	45	019	01252740	Charleston	2.84125	Central conglomerate
354	45	015	01247985	Berkeley	7.91597	Central conglomerate
355	45	013	01247984	Beaufort	6.30029	Southern conglomerate
356	45	051	01248005	Horry	6.28791	Northern conglomerate
357	45	051	01248005	Horry	3.03408	Northern conglomerate
358	45	051	01248005	Horry	1.28865	Northern conglomerate
359	45	019	01252740	Charleston	1.04118	Central conglomerate
360	45	035	01247998	Dorchester	0.890706	Central conglomerate
361	45	013	01247984	Beaufort	2.56986	Southern conglomerate
362	45	051	01248005	Horry	2.73861	Northern conglomerate
363	45	051	01248005	Horry	5.35804	Northern conglomerate
364	45	051	01248005	Horry	1.10172	Northern conglomerate
365	45	051	01248005	Horry	2.89306	Northern conglomerate
366	45	051	01248005	Horry	2.83283	Northern conglomerate
367	45	051	01248005	Horry	1.1017	Northern conglomerate
368	45	019	01252740	Charleston	16.6066	Central conglomerate
369	45	051	01248005	Horry	1.72952	Northern conglomerate
370	45	051	01248005	Horry	3.04078	Northern conglomerate
371	45	013	01247984	Beaufort	3.66214	Southern conglomerate
372	45	051	01248005	Horry	2.60931	Northern conglomerate
373	45	019	01252740	Charleston	1.14181	Central conglomerate
374	45	019	01252740	Charleston	1.17879	Central conglomerate
375	45	015	01247985	Berkeley	3.57788	Central conglomerate
376	45	051	01248005	Horry	1.65047	Northern conglomerate
377	45	013	01247984	Beaufort	2.55288	Southern conglomerate
378	45	051	01248005	Horry	5.35587	Northern conglomerate
379	45	019	01252740	Charleston	1.04116	Central conglomerate
380	45	019	01252740	Charleston	5.02855	Central conglomerate
381	45	019	01252740	Charleston	1.04115	Central conglomerate
382	45	019	01252740	Charleston	1.69486	Central conglomerate
383	45	051	01248005	Horry	10.3778	Northern conglomerate
384	45	015	01247985	Berkeley	0.925202	Central conglomerate
385	45	019	01252740	Charleston	7.55386	Central conglomerate
386	45	015	01247985	Berkeley	2.6002	Central conglomerate
387	45	015	01247985	Berkeley	0.965835	Central conglomerate
388	45	019	01252740	Charleston	2.87722	Central conglomerate
389	45	051	01248005	Horry	2.32354	Northern conglomerate
390	45	051	01248005	Horry	4.87137	Northern conglomerate
391	45	051	01248005	Horry	7.75435	Northern conglomerate
392	45	035	01247998	Dorchester	8.64584	Central conglomerate
393	45	051	01248005	Horry	6.31951	Northern conglomerate
394	45	051	01248005	Horry	14.2464	Northern conglomerate
395	45	051	01248005	Horry	1.21305	Northern conglomerate
396	45	019	01252740	Charleston	3.07851	Central conglomerate
397	45	035	01247998	Dorchester	1.29863	Central conglomerate
398	45	051	01248005	Horry	9.34581	Northern conglomerate
399	45	051	01248005	Horry	1.10174	Northern conglomerate
400	45	051	01248005	Horry	8.02222	Northern conglomerate
401	45	019	01252740	Charleston	1.21988	Central conglomerate
402	45	019	01252740	Charleston	2.39031	Central conglomerate
403	45	019	01252740	Charleston	3.61175	Central conglomerate
404	45	019	01252740	Charleston	2.39029	Central conglomerate
405	45	051	01248005	Horry	3.16533	Northern conglomerate
406	45	013	01247984	Beaufort	1.57608	Southern conglomerate
407	45	013	01247984	Beaufort	1.11952	Southern conglomerate
408	45	051	01248005	Horry	3.44028	Northern conglomerate
409	45	051	01248005	Horry	1.21307	Northern conglomerate
410	45	051	01248005	Horry	8.67091	Northern conglomerate
411	45	051	01248005	Horry	1.19794	Northern conglomerate
412	45	019	01252740	Charleston	1.04117	Central conglomerate
413	45	051	01248005	Horry	11.8004	Northern conglomerate
414	45	051	01248005	Horry	2.4948	Northern conglomerate
415	45	051	01248005	Horry	8.15136	Northern conglomerate
416	45	051	01248005	Horry	5.31799	Northern conglomerate
417	45	015	01247985	Berkeley	6.53694	Central conglomerate
418	45	051	01248005	Horry	1.10181	Northern conglomerate
419	45	051	01248005	Horry	3.36313	Northern conglomerate
420	45	013	01247984	Beaufort	3.13082	Southern conglomerate
421	45	051	01248005	Horry	4.21817	Northern conglomerate
422	45	013	01247984	Beaufort	2.34529	Southern conglomerate
423	45	015	01247985	Berkeley	0.965841	Central conglomerate
424	45	019	01252740	Charleston	2.89423	Central conglomerate
425	45	019	01252740	Charleston	2.39033	Central conglomerate
426	45	019	01252740	Charleston	1.04117	Central conglomerate
427	45	051	01248005	Horry	2.60578	Northern conglomerate
428	45	019	01252740	Charleston	1.04118	Central conglomerate
429	45	019	01252740	Charleston	1.83301	Central conglomerate
430	45	019	01252740	Charleston	1.89108	Central conglomerate
431	45	013	01247984	Beaufort	1.06572	Southern conglomerate
432	45	051	01248005	Horry	1.2091	Northern conglomerate
433	45	013	01247984	Beaufort	1.61442	Southern conglomerate
434	45	051	01248005	Horry	1.1017	Northern conglomerate
435	45	019	01252740	Charleston	5.46807	Central conglomerate
436	45	051	01248005	Horry	5.81245	Northern conglomerate
437	45	019	01252740	Charleston	3.49404	Central conglomerate
438	45	019	01252740	Charleston	3.08452	Central conglomerate
439	45	015	01247985	Berkeley	0.965858	Central conglomerate
440	45	019	01252740	Charleston	2.54526	Central conglomerate
441	45	019	01252740	Charleston	1.14617	Central conglomerate
442	45	019	01252740	Charleston	3.6323	Central conglomerate
443	45	019	01252740	Charleston	2.85589	Central conglomerate
444	45	015	01247985	Berkeley	10.0263	Central conglomerate
445	45	051	01248005	Horry	6.48161	Northern conglomerate
446	45	053	01248006	Jasper	2.6314	Southern conglomerate
447	45	013	01247984	Beaufort	2.55285	Southern conglomerate
448	45	051	01248005	Horry	2.84083	Northern conglomerate
449	45	051	01248005	Horry	5.20083	Northern conglomerate
450	45	043	01248002	Georgetown	1.78736	Northern conglomerate
451	45	019	01252740	Charleston	3.16129	Central conglomerate
452	45	035	01247998	Dorchester	0.890721	Central conglomerate
453	45	035	01247998	Dorchester	3.63271	Central conglomerate
454	45	051	01248005	Horry	2.27762	Northern conglomerate
455	45	013	01247984	Beaufort	0.770485	Southern conglomerate
456	45	051	01248005	Horry	3.03399	Northern conglomerate
457	45	013	01247984	Beaufort	3.6678	Southern conglomerate
458	45	051	01248005	Horry	6.97351	Northern conglomerate
459	45	051	01248005	Horry	1.10174	Northern conglomerate
460	45	035	01247998	Dorchester	0.890685	Central conglomerate
461	45	019	01252740	Charleston	1.09864	Central conglomerate
462	45	051	01248005	Horry	2.83258	Northern conglomerate
463	45	051	01248005	Horry	6.52328	Northern conglomerate
464	45	051	01248005	Horry	2.92909	Northern conglomerate
465	45	035	01247998	Dorchester	1.34561	Central conglomerate
466	45	019	01252740	Charleston	1.04115	Central conglomerate
467	45	051	01248005	Horry	1.10168	Northern conglomerate
468	45	051	01248005	Horry	1.10175	Northern conglomerate
469	45	019	01252740	Charleston	1.04142	Central conglomerate
470	45	019	01252740	Charleston	1.04118	Central conglomerate
471	45	019	01252740	Charleston	2.22083	Central conglomerate
472	45	019	01252740	Charleston	2.0185	Central conglomerate
473	45	019	01252740	Charleston	1.73495	Central conglomerate
474	45	019	01252740	Charleston	2.36822	Central conglomerate
475	45	015	01247985	Berkeley	2.3037	Central conglomerate
476	45	051	01248005	Horry	3.39982	Northern conglomerate
477	45	051	01248005	Horry	1.10172	Northern conglomerate
478	45	015	01247985	Berkeley	0.965802	Central conglomerate
479	45	051	01248005	Horry	2.4395	Northern conglomerate
480	45	019	01252740	Charleston	4.69957	Central conglomerate
481	45	051	01248005	Horry	2.21581	Northern conglomerate
482	45	019	01252740	Charleston	7.38945	Central conglomerate
483	45	013	01247984	Beaufort	7.12255	Southern conglomerate
484	45	051	01248005	Horry	0.99282	Northern conglomerate
485	45	051	01248005	Horry	1.14797	Northern conglomerate
486	45	051	01248005	Horry	5.8273	Northern conglomerate
487	45	019	01252740	Charleston	1.59348	Central conglomerate
488	45	019	01252740	Charleston	1.04117	Central conglomerate
489	45	015	01247985	Berkeley	2.68119	Central conglomerate
490	45	051	01248005	Horry	2.92887	Northern conglomerate
491	45	015	01247985	Berkeley	0.901522	Central conglomerate
492	45	019	01252740	Charleston	0.8858	Central conglomerate
493	45	051	01248005	Horry	6.63154	Northern conglomerate
494	45	051	01248005	Horry	2.34566	Northern conglomerate
495	45	015	01247985	Berkeley	3.62942	Central conglomerate
496	45	019	01252740	Charleston	1.14229	Central conglomerate
497	45	043	01248002	Georgetown	1.31657	Northern conglomerate
498	45	019	01252740	Charleston	3.62705	Central conglomerate
499	45	013	01247984	Beaufort	3.90323	Southern conglomerate
500	45	019	01252740	Charleston	6.89043	Central conglomerate
501	45	051	01248005	Horry	2.8407	Northern conglomerate
502	45	051	01248005	Horry	1.74638	Northern conglomerate
503	45	019	01252740	Charleston	1.3815	Central conglomerate
504	45	051	01248005	Horry	4.12833	Northern conglomerate
505	45	015	01247985	Berkeley	12.1154	Central conglomerate
506	45	019	01252740	Charleston	5.05635	Central conglomerate
507	45	015	01247985	Berkeley	6.0031	Central conglomerate
508	45	015	01247985	Berkeley	1.04826	Central conglomerate
509	45	019	01252740	Charleston	7.15492	Central conglomerate
510	45	051	01248005	Horry	3.73902	Northern conglomerate
511	45	051	01248005	Horry	0.977393	Northern conglomerate
512	45	035	01247998	Dorchester	1.66437	Central conglomerate
513	45	051	01248005	Horry	5.20239	Northern conglomerate
514	45	035	01247998	Dorchester	0.890959	Central conglomerate
515	45	043	01248002	Georgetown	1.07434	Northern conglomerate
516	45	051	01248005	Horry	2.56324	Northern conglomerate
517	45	029	01247991	Colleton	4.69688	Southern conglomerate
518	45	013	01247984	Beaufort	1.06581	Southern conglomerate
519	45	051	01248005	Horry	1.10163	Northern conglomerate
520	45	051	01248005	Horry	1.70292	Northern conglomerate
521	45	051	01248005	Horry	1.10168	Northern conglomerate
522	45	015	01247985	Berkeley	9.95427	Central conglomerate
523	45	051	01248005	Horry	7.9272	Northern conglomerate
524	45	051	01248005	Horry	1.21288	Northern conglomerate
525	45	051	01248005	Horry	1.65041	Northern conglomerate
526	45	051	01248005	Horry	1.76172	Northern conglomerate
527	45	051	01248005	Horry	9.01788	Northern conglomerate
528	45	035	01247998	Dorchester	12.9329	Central conglomerate
529	45	051	01248005	Horry	6.17962	Northern conglomerate
530	45	015	01247985	Berkeley	0.965847	Central conglomerate
531	45	051	01248005	Horry	1.21304	Northern conglomerate
532	45	019	01252740	Charleston	4.40352	Central conglomerate
533	45	051	01248005	Horry	19.2426	Northern conglomerate
534	45	019	01252740	Charleston	5.17351	Central conglomerate
535	45	043	01248002	Georgetown	3.8599	Northern conglomerate
536	45	019	01252740	Charleston	1.20359	Central conglomerate
537	45	051	01248005	Horry	2.48334	Northern conglomerate
538	45	051	01248005	Horry	15.0307	Northern conglomerate
539	45	019	01252740	Charleston	1.04115	Central conglomerate
540	45	051	01248005	Horry	1.74036	Northern conglomerate
541	45	019	01252740	Charleston	5.97337	Central conglomerate
542	45	051	01248005	Horry	1.79821	Northern conglomerate
543	45	019	01252740	Charleston	2.43679	Central conglomerate
544	45	019	01252740	Charleston	5.18541	Central conglomerate
545	45	013	01247984	Beaufort	1.50324	Southern conglomerate
546	45	051	01248005	Horry	5.73438	Northern conglomerate
547	45	015	01247985	Berkeley	2.84061	Central conglomerate
548	45	051	01248005	Horry	6.9352	Northern conglomerate
549	45	019	01252740	Charleston	2.55362	Central conglomerate
550	45	051	01248005	Horry	1.10173	Northern conglomerate
551	45	019	01252740	Charleston	6.09626	Central conglomerate
552	45	019	01252740	Charleston	1.46156	Central conglomerate
553	45	051	01248005	Horry	7.24926	Northern conglomerate
554	45	051	01248005	Horry	1.65045	Northern conglomerate
555	45	051	01248005	Horry	0.866071	Northern conglomerate
556	45	051	01248005	Horry	1.56625	Northern conglomerate
557	45	019	01252740	Charleston	1.04119	Central conglomerate
558	45	013	01247984	Beaufort	1.93135	Southern conglomerate
559	45	013	01247984	Beaufort	2.78665	Southern conglomerate
560	45	051	01248005	Horry	4.66853	Northern conglomerate
561	45	051	01248005	Horry	1.34938	Northern conglomerate
562	45	019	01252740	Charleston	2.07503	Central conglomerate
563	45	043	01248002	Georgetown	0.803443	Northern conglomerate
564	45	051	01248005	Horry	1.76175	Northern conglomerate
565	45	015	01247985	Berkeley	1.04825	Central conglomerate
566	45	019	01252740	Charleston	3.79912	Central conglomerate
567	45	051	01248005	Horry	7.25542	Northern conglomerate
568	45	015	01247985	Berkeley	5.04622	Central conglomerate
569	45	015	01247985	Berkeley	17.4444	Central conglomerate
570	45	019	01252740	Charleston	1.71977	Central conglomerate
571	45	051	01248005	Horry	1.10173	Northern conglomerate
572	45	051	01248005	Horry	6.59546	Northern conglomerate
573	45	051	01248005	Horry	0.98537	Northern conglomerate
574	45	051	01248005	Horry	2.24462	Northern conglomerate
575	45	051	01248005	Horry	1.53125	Northern conglomerate
576	45	051	01248005	Horry	4.10684	Northern conglomerate
577	45	015	01247985	Berkeley	1.04828	Central conglomerate
578	45	019	01252740	Charleston	3.51293	Central conglomerate
579	45	019	01252740	Charleston	1.04146	Central conglomerate
580	45	019	01252740	Charleston	1.04061	Central conglomerate
581	45	051	01248005	Horry	1.21302	Northern conglomerate
582	45	019	01252740	Charleston	1.70989	Central conglomerate
583	45	013	01247984	Beaufort	1.55727	Southern conglomerate
584	45	051	01248005	Horry	2.19437	Northern conglomerate
585	45	051	01248005	Horry	1.10166	Northern conglomerate
586	45	019	01252740	Charleston	2.9105	Central conglomerate
587	45	051	01248005	Horry	10.8533	Northern conglomerate
588	45	019	01252740	Charleston	2.78877	Central conglomerate
589	45	051	01248005	Horry	1.10261	Northern conglomerate
590	45	035	01247998	Dorchester	0.890698	Central conglomerate
591	45	051	01248005	Horry	1.72579	Northern conglomerate
592	45	051	01248005	Horry	5.07957	Northern conglomerate
593	45	013	01247984	Beaufort	2.65852	Southern conglomerate
594	45	051	01248005	Horry	1.19795	Northern conglomerate
595	45	051	01248005	Horry	34.088	Northern conglomerate
596	45	019	01252740	Charleston	1.04121	Central conglomerate
597	45	051	01248005	Horry	1.21307	Northern conglomerate
598	45	015	01247985	Berkeley	2.16235	Central conglomerate
599	45	019	01252740	Charleston	1.6325	Central conglomerate
600	45	051	01248005	Horry	5.01875	Northern conglomerate
601	45	013	01247984	Beaufort	1.06577	Southern conglomerate
602	45	013	01247984	Beaufort	2.07042	Southern conglomerate
603	45	019	01252740	Charleston	1.14617	Central conglomerate
604	45	051	01248005	Horry	2.63264	Northern conglomerate
605	45	035	01247998	Dorchester	2.03351	Central conglomerate
606	45	051	01248005	Horry	1.42741	Northern conglomerate
607	45	051	01248005	Horry	8.02243	Northern conglomerate
608	45	051	01248005	Horry	2.2446	Northern conglomerate
609	45	051	01248005	Horry	10.6532	Northern conglomerate
610	45	051	01248005	Horry	4.77152	Northern conglomerate
611	45	019	01252740	Charleston	3.41187	Central conglomerate
612	45	035	01247998	Dorchester	2.78417	Central conglomerate
613	45	013	01247984	Beaufort	1.06571	Southern conglomerate
614	45	051	01248005	Horry	1.10174	Northern conglomerate
615	45	019	01252740	Charleston	2.17408	Central conglomerate
616	45	019	01252740	Charleston	1.43063	Central conglomerate
617	45	015	01247985	Berkeley	17.2332	Central conglomerate
618	45	019	01252740	Charleston	1.58996	Central conglomerate
619	45	051	01248005	Horry	1.65044	Northern conglomerate
620	45	051	01248005	Horry	8.48142	Northern conglomerate
621	45	043	01248002	Georgetown	0.80316	Northern conglomerate
622	45	051	01248005	Horry	1.7467	Northern conglomerate
623	45	051	01248005	Horry	4.10687	Northern conglomerate
624	45	051	01248005	Horry	2.84549	Northern conglomerate
625	45	051	01248005	Horry	1.10174	Northern conglomerate
626	45	013	01247984	Beaufort	1.12112	Southern conglomerate
627	45	053	01248006	Jasper	8.89203	Southern conglomerate
628	45	019	01252740	Charleston	2.80189	Central conglomerate
629	45	019	01252740	Charleston	1.75885	Central conglomerate
630	45	051	01248005	Horry	8.23923	Northern conglomerate
631	45	051	01248005	Horry	8.81088	Northern conglomerate
632	45	051	01248005	Horry	5.326	Northern conglomerate
633	45	051	01248005	Horry	6.86713	Northern conglomerate
634	45	015	01247985	Berkeley	1.93508	Central conglomerate
635	45	051	01248005	Horry	1.65042	Northern conglomerate
636	45	051	01248005	Horry	8.29297	Northern conglomerate
637	45	051	01248005	Horry	6.90515	Northern conglomerate
638	45	013	01247984	Beaufort	1.3778	Southern conglomerate
639	45	013	01247984	Beaufort	4.22557	Southern conglomerate
640	45	019	01252740	Charleston	2.11542	Central conglomerate
641	45	043	01248002	Georgetown	2.31858	Northern conglomerate
642	45	043	01248002	Georgetown	4.74478	Northern conglomerate
643	45	019	01252740	Charleston	2.24871	Central conglomerate
644	45	051	01248005	Horry	2.4571	Northern conglomerate
645	45	051	01248005	Horry	0.956354	Northern conglomerate
646	45	051	01248005	Horry	1.10169	Northern conglomerate
647	45	019	01252740	Charleston	1.14613	Central conglomerate
648	45	051	01248005	Horry	6.80543	Northern conglomerate
649	45	051	01248005	Horry	1.10167	Northern conglomerate
650	45	013	01247984	Beaufort	2.07046	Southern conglomerate
651	45	051	01248005	Horry	2.71141	Northern conglomerate
652	45	051	01248005	Horry	1.0959	Northern conglomerate
653	45	051	01248005	Horry	8.08797	Northern conglomerate
654	45	053	01248006	Jasper	1.48788	Southern conglomerate
655	45	019	01252740	Charleston	1.44117	Central conglomerate
656	45	051	01248005	Horry	2.44521	Northern conglomerate
657	45	013	01247984	Beaufort	1.14464	Southern conglomerate
658	45	019	01252740	Charleston	5.11916	Central conglomerate
659	45	051	01248005	Horry	2.45711	Northern conglomerate
660	45	035	01247998	Dorchester	3.77644	Central conglomerate
661	45	051	01248005	Horry	0.970016	Northern conglomerate
662	45	051	01248005	Horry	2.2521	Northern conglomerate
663	45	051	01248005	Horry	3.03409	Northern conglomerate
664	45	051	01248005	Horry	2.89348	Northern conglomerate
665	45	013	01247984	Beaufort	5.50407	Southern conglomerate
666	45	051	01248005	Horry	1.66833	Northern conglomerate
667	45	051	01248005	Horry	1.59995	Northern conglomerate
668	45	015	01247985	Berkeley	1.04827	Central conglomerate
669	45	015	01247985	Berkeley	2.74719	Central conglomerate
670	45	013	01247984	Beaufort	1.1822	Southern conglomerate
671	45	051	01248005	Horry	7.47104	Northern conglomerate
672	45	051	01248005	Horry	10.3372	Northern conglomerate
673	45	051	01248005	Horry	6.42703	Northern conglomerate
674	45	019	01252740	Charleston	1.04106	Central conglomerate
675	45	051	01248005	Horry	1.21304	Northern conglomerate
676	45	051	01248005	Horry	0.969726	Northern conglomerate
677	45	051	01248005	Horry	1.09637	Northern conglomerate
678	45	015	01247985	Berkeley	3.971	Central conglomerate
679	45	019	01252740	Charleston	1.04107	Central conglomerate
680	45	015	01247985	Berkeley	0.901578	Central conglomerate
681	45	015	01247985	Berkeley	1.04789	Central conglomerate
682	45	019	01252740	Charleston	1.04116	Central conglomerate
683	45	043	01248002	Georgetown	1.06629	Northern conglomerate
684	45	051	01248005	Horry	4.84503	Northern conglomerate
685	45	019	01252740	Charleston	2.09069	Central conglomerate
686	45	051	01248005	Horry	1.1017	Northern conglomerate
687	45	019	01252740	Charleston	2.37901	Central conglomerate
688	45	015	01247985	Berkeley	1.08564	Central conglomerate
689	45	051	01248005	Horry	5.57472	Northern conglomerate
690	45	051	01248005	Horry	7.20206	Northern conglomerate
691	45	051	01248005	Horry	11.0667	Northern conglomerate
692	45	013	01247984	Beaufort	1.06575	Southern conglomerate
693	45	019	01252740	Charleston	1.14614	Central conglomerate
694	45	051	01248005	Horry	1.61309	Northern conglomerate
695	45	019	01252740	Charleston	4.80456	Central conglomerate
696	45	019	01252740	Charleston	1.04146	Central conglomerate
697	45	019	01252740	Charleston	1.60108	Central conglomerate
698	45	051	01248005	Horry	5.01951	Northern conglomerate
699	45	013	01247984	Beaufort	1.16052	Southern conglomerate
700	45	019	01252740	Charleston	2.74198	Central conglomerate
701	45	051	01248005	Horry	1.81948	Northern conglomerate
702	45	051	01248005	Horry	1.10186	Northern conglomerate
703	45	051	01248005	Horry	4.31355	Northern conglomerate
704	45	051	01248005	Horry	1.21304	Northern conglomerate
705	45	019	01252740	Charleston	3.85623	Central conglomerate
706	45	051	01248005	Horry	3.62945	Northern conglomerate
707	45	019	01252740	Charleston	1.04117	Central conglomerate
708	45	051	01248005	Horry	7.9272	Northern conglomerate
709	45	051	01248005	Horry	2.34592	Northern conglomerate
710	45	051	01248005	Horry	1.60785	Northern conglomerate
711	45	051	01248005	Horry	1.10172	Northern conglomerate
712	45	019	01252740	Charleston	3.07821	Central conglomerate
713	45	019	01252740	Charleston	1.0411	Central conglomerate
714	45	051	01248005	Horry	3.07574	Northern conglomerate
715	45	043	01248002	Georgetown	1.19603	Northern conglomerate
716	45	015	01247985	Berkeley	1.04828	Central conglomerate
717	45	035	01247998	Dorchester	6.45165	Central conglomerate
718	45	051	01248005	Horry	2.19856	Northern conglomerate
719	45	015	01247985	Berkeley	0.800085	Central conglomerate
720	45	043	01248002	Georgetown	1.07435	Northern conglomerate
721	45	051	01248005	Horry	6.93252	Northern conglomerate
722	45	013	01247984	Beaufort	2.035	Southern conglomerate
723	45	051	01248005	Horry	1.198	Northern conglomerate
724	45	051	01248005	Horry	0.881088	Northern conglomerate
725	45	013	01247984	Beaufort	1.11946	Southern conglomerate
726	45	051	01248005	Horry	5.07077	Northern conglomerate
727	45	051	01248005	Horry	2.40285	Northern conglomerate
728	45	051	01248005	Horry	2.48612	Northern conglomerate
729	45	019	01252740	Charleston	2.40598	Central conglomerate
730	45	051	01248005	Horry	3.66221	Northern conglomerate
731	45	051	01248005	Horry	1.21305	Northern conglomerate
732	45	051	01248005	Horry	2.49594	Northern conglomerate
733	45	013	01247984	Beaufort	4.04698	Southern conglomerate
734	45	015	01247985	Berkeley	0.800387	Central conglomerate
735	45	019	01252740	Charleston	0.805551	Central conglomerate
736	45	019	01252740	Charleston	1.14617	Central conglomerate
737	45	051	01248005	Horry	1.21306	Northern conglomerate
738	45	019	01252740	Charleston	1.14615	Central conglomerate
739	45	019	01252740	Charleston	1.0413	Central conglomerate
740	45	043	01248002	Georgetown	0.567501	Northern conglomerate
741	45	019	01252740	Charleston	1.14616	Central conglomerate
742	45	051	01248005	Horry	2.18234	Northern conglomerate
743	45	051	01248005	Horry	7.01214	Northern conglomerate
744	45	043	01248002	Georgetown	0.803178	Northern conglomerate
745	45	051	01248005	Horry	5.14118	Northern conglomerate
746	45	015	01247985	Berkeley	4.22573	Central conglomerate
747	45	051	01248005	Horry	9.13772	Northern conglomerate

## Sheet: Post-evacuation-NotEvacuated
id	STATEFP	COUNTYFP	COUNTYNS	AFFGEOID	DIST_DIFF	Cnglmerate
1	45	051	01248005	0500000US45051	-1.04044e-05	Northern conglomerate
2	45	051	01248005	0500000US45051	0.00414048	Northern conglomerate
3	45	051	01248005	0500000US45051	3.32304e-05	Northern conglomerate
4	45	019	01252740	0500000US45019	-0.000369992	Central conglomerate
5	45	051	01248005	0500000US45051	1.95631e-06	Northern conglomerate
6	45	051	01248005	0500000US45051	4.83802e-06	Northern conglomerate
7	45	019	01252740	0500000US45019	-4.01421e-05	Central conglomerate
8	45	051	01248005	0500000US45051	1.02928e-05	Northern conglomerate
9	45	051	01248005	0500000US45051	-8.33642e-06	Northern conglomerate
10	45	015	01247985	0500000US45015	5.48818e-05	Central conglomerate
11	45	015	01247985	0500000US45015	4.11584e-05	Central conglomerate
12	45	035	01247998	0500000US45035	-0.0111101	Central conglomerate
13	45	015	01247985	0500000US45015	-0.0520661	Central conglomerate
14	45	051	01248005	0500000US45051	-0.0171809	Northern conglomerate
15	45	051	01248005	0500000US45051	-1.2057e-05	Northern conglomerate
16	45	051	01248005	0500000US45051	3.69132e-06	Northern conglomerate
17	45	043	01248002	0500000US45043	-0.0160829	Northern conglomerate
18	45	051	01248005	0500000US45051	0.0503422	Northern conglomerate
19	45	051	01248005	0500000US45051	-0.0510174	Northern conglomerate
20	45	051	01248005	0500000US45051	-3.35387e-05	Northern conglomerate
21	45	051	01248005	0500000US45051	6.15119e-05	Northern conglomerate
22	45	051	01248005	0500000US45051	-2.20902e-05	Northern conglomerate
23	45	051	01248005	0500000US45051	6.37384e-05	Northern conglomerate
24	45	051	01248005	0500000US45051	2.91059e-06	Northern conglomerate
25	45	019	01252740	0500000US45019	1.13266e-06	Central conglomerate
26	45	015	01247985	0500000US45015	1.7707e-05	Central conglomerate
27	45	019	01252740	0500000US45019	0	Central conglomerate
28	45	051	01248005	0500000US45051	0.000129513	Northern conglomerate
29	45	015	01247985	0500000US45015	-2.88952e-05	Central conglomerate
30	45	043	01248002	0500000US45043	4.11455e-07	Northern conglomerate
31	45	019	01252740	0500000US45019	-5.14451e-05	Central conglomerate
32	45	051	01248005	0500000US45051	1.25062e-05	Northern conglomerate
33	45	051	01248005	0500000US45051	9.21847e-06	Northern conglomerate
34	45	015	01247985	0500000US45015	6.99072e-06	Central conglomerate
35	45	051	01248005	0500000US45051	4.15881e-06	Northern conglomerate
36	45	019	01252740	0500000US45019	-0.000148399	Central conglomerate
37	45	019	01252740	0500000US45019	-7.22607e-05	Central conglomerate
38	45	051	01248005	0500000US45051	1.22634e-05	Northern conglomerate
39	45	051	01248005	0500000US45051	-1.75341e-05	Northern conglomerate
40	45	051	01248005	0500000US45051	-0.00629707	Northern conglomerate
41	45	051	01248005	0500000US45051	-1.66498e-05	Northern conglomerate
42	45	051	01248005	0500000US45051	-0.0563299	Northern conglomerate
43	45	051	01248005	0500000US45051	-2.47367e-06	Northern conglomerate
44	45	051	01248005	0500000US45051	0.0563618	Northern conglomerate
45	45	051	01248005	0500000US45051	3.78487e-05	Northern conglomerate
46	45	043	01248002	0500000US45043	-5.80655e-06	Northern conglomerate
47	45	051	01248005	0500000US45051	-6.3714e-05	Northern conglomerate
48	45	019	01252740	0500000US45019	-0.060848	Central conglomerate
49	45	051	01248005	0500000US45051	8.33897e-06	Northern conglomerate
50	45	019	01252740	0500000US45019	-3.72205e-05	Central conglomerate
51	45	051	01248005	0500000US45051	-5.47505e-05	Northern conglomerate
52	45	051	01248005	0500000US45051	7.97061e-06	Northern conglomerate
53	45	051	01248005	0500000US45051	-3.73129e-06	Northern conglomerate
54	45	013	01247984	0500000US45013	-3.95926e-05	Southern conglomerate
55	45	015	01247985	0500000US45015	-0.0824363	Central conglomerate
56	45	051	01248005	0500000US45051	-4.35488e-06	Northern conglomerate
57	45	019	01252740	0500000US45019	-2.09509e-05	Central conglomerate
58	45	019	01252740	0500000US45019	3.99999e-13	Central conglomerate
59	45	019	01252740	0500000US45019	-4.4376e-06	Central conglomerate
60	45	019	01252740	0500000US45019	-6.39072e-06	Central conglomerate
61	45	051	01248005	0500000US45051	-1.35559e-05	Northern conglomerate
62	45	019	01252740	0500000US45019	-1.46709e-05	Central conglomerate
63	45	019	01252740	0500000US45019	2.02675e-05	Central conglomerate
64	45	051	01248005	0500000US45051	0.000134347	Northern conglomerate
65	45	051	01248005	0500000US45051	0.021371	Northern conglomerate
66	45	015	01247985	0500000US45015	-3.96692e-06	Central conglomerate
67	45	043	01248002	0500000US45043	-0.00200921	Northern conglomerate
68	45	051	01248005	0500000US45051	7.94894e-06	Northern conglomerate
69	45	019	01252740	0500000US45019	9.99895e-14	Central conglomerate
70	45	019	01252740	0500000US45019	-1.00003e-13	Central conglomerate
71	45	051	01248005	0500000US45051	-2.07578e-05	Northern conglomerate
72	45	051	01248005	0500000US45051	0.0594256	Northern conglomerate
73	45	051	01248005	0500000US45051	3.99446e-06	Northern conglomerate
74	45	051	01248005	0500000US45051	-2.9897e-05	Northern conglomerate
75	45	019	01252740	0500000US45019	-3.79745e-06	Central conglomerate
76	45	019	01252740	0500000US45019	-1.47801e-06	Central conglomerate
77	45	019	01252740	0500000US45019	-0.0990348	Central conglomerate
78	45	015	01247985	0500000US45015	-5.47758e-07	Central conglomerate
79	45	015	01247985	0500000US45015	-0.0159243	Central conglomerate
80	45	051	01248005	0500000US45051	0.00195649	Northern conglomerate
81	45	051	01248005	0500000US45051	-1.79526e-06	Northern conglomerate
82	45	019	01252740	0500000US45019	0.101133	Central conglomerate
83	45	015	01247985	0500000US45015	6.28509e-05	Central conglomerate
84	45	043	01248002	0500000US45043	-8.04728e-06	Northern conglomerate
85	45	051	01248005	0500000US45051	7.23482e-06	Northern conglomerate
86	45	051	01248005	0500000US45051	-0.0246875	Northern conglomerate
87	45	019	01252740	0500000US45019	6.61255e-06	Central conglomerate
88	45	051	01248005	0500000US45051	-8.21696e-05	Northern conglomerate
89	45	051	01248005	0500000US45051	-1.43103e-05	Northern conglomerate
90	45	015	01247985	0500000US45015	2.38377e-05	Central conglomerate
91	45	051	01248005	0500000US45051	-0.226323	Northern conglomerate
92	45	019	01252740	0500000US45019	-0.00641003	Central conglomerate
93	45	019	01252740	0500000US45019	0.169137	Central conglomerate
94	45	051	01248005	0500000US45051	0.0652599	Northern conglomerate
95	45	019	01252740	0500000US45019	-1.00539e-05	Central conglomerate
96	45	051	01248005	0500000US45051	-0.000121908	Northern conglomerate
97	45	019	01252740	0500000US45019	-2.84795e-05	Central conglomerate
98	45	019	01252740	0500000US45019	0.241059	Central conglomerate
99	45	015	01247985	0500000US45015	0	Central conglomerate
100	45	043	01248002	0500000US45043	7.69808e-06	Northern conglomerate
101	45	051	01248005	0500000US45051	0.083681	Northern conglomerate
102	45	019	01252740	0500000US45019	5.00505e-06	Central conglomerate
103	45	051	01248005	0500000US45051	5.00698e-05	Northern conglomerate
104	45	019	01252740	0500000US45019	0.0106212	Central conglomerate
105	45	013	01247984	0500000US45013	1.04376e-05	Southern conglomerate
106	45	051	01248005	0500000US45051	0.0131034	Northern conglomerate
107	45	013	01247984	0500000US45013	-1.20252e-05	Southern conglomerate
108	45	051	01248005	0500000US45051	-0.00646411	Northern conglomerate
109	45	019	01252740	0500000US45019	9.16004e-05	Central conglomerate
110	45	051	01248005	0500000US45051	-4.19221e-06	Northern conglomerate
111	45	015	01247985	0500000US45015	-9.16771e-05	Central conglomerate
112	45	051	01248005	0500000US45051	9.11474e-06	Northern conglomerate
113	45	019	01252740	0500000US45019	-1.10026e-06	Central conglomerate
114	45	035	01247998	0500000US45035	4.02112e-06	Central conglomerate
115	45	051	01248005	0500000US45051	0.0150431	Northern conglomerate
116	45	051	01248005	0500000US45051	6.76599e-05	Northern conglomerate
117	45	051	01248005	0500000US45051	0.132009	Northern conglomerate
118	45	051	01248005	0500000US45051	-0.0588388	Northern conglomerate
119	45	051	01248005	0500000US45051	0.020655	Northern conglomerate
120	45	019	01252740	0500000US45019	-0.00712596	Central conglomerate
121	45	035	01247998	0500000US45035	-0.150492	Central conglomerate
122	45	051	01248005	0500000US45051	6.41605e-05	Northern conglomerate
123	45	019	01252740	0500000US45019	-1.968e-08	Central conglomerate
124	45	051	01248005	0500000US45051	6.06503e-05	Northern conglomerate
125	45	051	01248005	0500000US45051	0.132032	Northern conglomerate
126	45	015	01247985	0500000US45015	0.034473	Central conglomerate
127	45	051	01248005	0500000US45051	-0.000338837	Northern conglomerate
128	45	015	01247985	0500000US45015	-0.139618	Central conglomerate
129	45	015	01247985	0500000US45015	1.24563e-06	Central conglomerate
130	45	051	01248005	0500000US45051	-0.111098	Northern conglomerate
131	45	051	01248005	0500000US45051	0.180749	Northern conglomerate
132	45	051	01248005	0500000US45051	1.78698e-05	Northern conglomerate
133	45	035	01247998	0500000US45035	0.000510072	Central conglomerate
134	45	015	01247985	0500000US45015	0.0823356	Central conglomerate
135	45	051	01248005	0500000US45051	-0.0245441	Northern conglomerate
136	45	051	01248005	0500000US45051	2.61082e-06	Northern conglomerate
137	45	051	01248005	0500000US45051	-4.28012e-05	Northern conglomerate
138	45	019	01252740	0500000US45019	7.3981e-05	Central conglomerate
139	45	051	01248005	0500000US45051	1.19999e-13	Northern conglomerate
140	45	019	01252740	0500000US45019	0.0724774	Central conglomerate
141	45	051	01248005	0500000US45051	-6.53002e-05	Northern conglomerate
142	45	051	01248005	0500000US45051	0.00619964	Northern conglomerate
143	45	015	01247985	0500000US45015	5.63447e-05	Central conglomerate
144	45	019	01252740	0500000US45019	-4.46242e-05	Central conglomerate
145	45	019	01252740	0500000US45019	-2.7341e-06	Central conglomerate
146	45	051	01248005	0500000US45051	-5.45316e-05	Northern conglomerate
147	45	019	01252740	0500000US45019	-0.117631	Central conglomerate
148	45	051	01248005	0500000US45051	1.49863e-05	Northern conglomerate
149	45	019	01252740	0500000US45019	-2.16934e-05	Central conglomerate
150	45	051	01248005	0500000US45051	0.0398495	Northern conglomerate
151	45	051	01248005	0500000US45051	-6.39262e-06	Northern conglomerate
152	45	051	01248005	0500000US45051	0.0034902	Northern conglomerate
153	45	051	01248005	0500000US45051	1.74503e-05	Northern conglomerate
154	45	051	01248005	0500000US45051	-5.27284e-05	Northern conglomerate
155	45	019	01252740	0500000US45019	2.10732e-05	Central conglomerate
156	45	015	01247985	0500000US45015	1.16566e-05	Central conglomerate
157	45	051	01248005	0500000US45051	4.97158e-06	Northern conglomerate
158	45	015	01247985	0500000US45015	5.33739e-05	Central conglomerate
159	45	019	01252740	0500000US45019	-1.55572e-06	Central conglomerate
160	45	019	01252740	0500000US45019	-8.46656e-05	Central conglomerate
161	45	051	01248005	0500000US45051	0.181439	Northern conglomerate
162	45	019	01252740	0500000US45019	-2.6298e-05	Central conglomerate
163	45	051	01248005	0500000US45051	0.00188215	Northern conglomerate
164	45	019	01252740	0500000US45019	0.214873	Central conglomerate
165	45	019	01252740	0500000US45019	7.66688e-06	Central conglomerate
166	45	043	01248002	0500000US45043	-2.08153e-05	Northern conglomerate
167	45	051	01248005	0500000US45051	3.09263e-05	Northern conglomerate
168	45	019	01252740	0500000US45019	0	Central conglomerate
169	45	051	01248005	0500000US45051	1.59097e-05	Northern conglomerate
170	45	019	01252740	0500000US45019	0.105025	Central conglomerate
171	45	051	01248005	0500000US45051	-0.00153484	Northern conglomerate
172	45	051	01248005	0500000US45051	-0.0186561	Northern conglomerate
173	45	051	01248005	0500000US45051	9.00322e-05	Northern conglomerate
174	45	015	01247985	0500000US45015	3.22781e-06	Central conglomerate
175	45	019	01252740	0500000US45019	1.09731e-05	Central conglomerate
176	45	035	01247998	0500000US45035	9.47254e-06	Central conglomerate
177	45	035	01247998	0500000US45035	-6.25134e-06	Central conglomerate
178	45	019	01252740	0500000US45019	3.38166e-05	Central conglomerate
179	45	051	01248005	0500000US45051	-3.56743e-05	Northern conglomerate
180	45	019	01252740	0500000US45019	2.60933e-05	Central conglomerate
181	45	019	01252740	0500000US45019	-0.0539281	Central conglomerate
182	45	043	01248002	0500000US45043	-0.0733175	Northern conglomerate
183	45	043	01248002	0500000US45043	1.34672e-05	Northern conglomerate
184	45	043	01248002	0500000US45043	-1.41575e-05	Northern conglomerate
185	45	051	01248005	0500000US45051	-2.06206e-06	Northern conglomerate
186	45	015	01247985	0500000US45015	9.45598e-06	Central conglomerate
187	45	051	01248005	0500000US45051	-0.0166216	Northern conglomerate
188	45	019	01252740	0500000US45019	-1.00003e-13	Central conglomerate
189	45	019	01252740	0500000US45019	-1.88244e-05	Central conglomerate
190	45	051	01248005	0500000US45051	-0.0831514	Northern conglomerate
191	45	051	01248005	0500000US45051	0.0618351	Northern conglomerate
192	45	051	01248005	0500000US45051	-6.42648e-06	Northern conglomerate
193	45	035	01247998	0500000US45035	-1.89071e-05	Central conglomerate
194	45	051	01248005	0500000US45051	-2.44275e-05	Northern conglomerate
195	45	051	01248005	0500000US45051	-1.89058e-05	Northern conglomerate
196	45	035	01247998	0500000US45035	6.97811e-05	Central conglomerate
197	45	019	01252740	0500000US45019	-0.000115073	Central conglomerate
198	45	051	01248005	0500000US45051	1.26538e-06	Northern conglomerate
199	45	051	01248005	0500000US45051	2.04404e-06	Northern conglomerate
200	45	035	01247998	0500000US45035	0.00010209	Central conglomerate
201	45	019	01252740	0500000US45019	-9.02762e-06	Central conglomerate
202	45	019	01252740	0500000US45019	6.03104e-06	Central conglomerate
203	45	051	01248005	0500000US45051	-1.26821e-06	Northern conglomerate
204	45	035	01247998	0500000US45035	7.82901e-05	Central conglomerate
205	45	019	01252740	0500000US45019	6.24227e-05	Central conglomerate
206	45	035	01247998	0500000US45035	0	Central conglomerate
207	45	015	01247985	0500000US45015	-2.48071e-06	Central conglomerate
208	45	051	01248005	0500000US45051	-1.42171e-06	Northern conglomerate
209	45	035	01247998	0500000US45035	4.72246e-05	Central conglomerate
210	45	051	01248005	0500000US45051	-5.49493e-05	Northern conglomerate
211	45	051	01248005	0500000US45051	0	Northern conglomerate
212	45	051	01248005	0500000US45051	-2.03855e-05	Northern conglomerate
213	45	019	01252740	0500000US45019	-7.02609e-06	Central conglomerate
214	45	019	01252740	0500000US45019	0.0286068	Central conglomerate
215	45	051	01248005	0500000US45051	9.39231e-07	Northern conglomerate
216	45	051	01248005	0500000US45051	5.91076e-06	Northern conglomerate
217	45	019	01252740	0500000US45019	-8.64002e-06	Central conglomerate
218	45	019	01252740	0500000US45019	-2.25644e-06	Central conglomerate
219	45	019	01252740	0500000US45019	-1.00003e-13	Central conglomerate
220	45	051	01248005	0500000US45051	0.0397111	Northern conglomerate
221	45	051	01248005	0500000US45051	0.0159134	Northern conglomerate
222	45	051	01248005	0500000US45051	-4.27316e-05	Northern conglomerate
223	45	051	01248005	0500000US45051	0.00177613	Northern conglomerate
224	45	051	01248005	0500000US45051	-1.15384e-05	Northern conglomerate
225	45	015	01247985	0500000US45015	-1.64368e-05	Central conglomerate
226	45	019	01252740	0500000US45019	-3.60233e-05	Central conglomerate
227	45	019	01252740	0500000US45019	0.00712449	Central conglomerate
228	45	051	01248005	0500000US45051	3.49617e-05	Northern conglomerate
229	45	043	01248002	0500000US45043	7.22201e-06	Northern conglomerate
230	45	043	01248002	0500000US45043	-2.0324e-05	Northern conglomerate
231	45	019	01252740	0500000US45019	-7.95775e-06	Central conglomerate
232	45	051	01248005	0500000US45051	-0.00468051	Northern conglomerate
233	45	051	01248005	0500000US45051	2.1911e-05	Northern conglomerate
234	45	019	01252740	0500000US45019	0	Central conglomerate
235	45	019	01252740	0500000US45019	0	Central conglomerate
236	45	051	01248005	0500000US45051	-1.02913e-05	Northern conglomerate
237	45	043	01248002	0500000US45043	0.0112606	Northern conglomerate
238	45	035	01247998	0500000US45035	1.94313e-05	Central conglomerate
239	45	019	01252740	0500000US45019	0.0331443	Central conglomerate
240	45	019	01252740	0500000US45019	-2.35445e-06	Central conglomerate
241	45	051	01248005	0500000US45051	7.78492e-06	Northern conglomerate
242	45	019	01252740	0500000US45019	-2.28276e-06	Central conglomerate
243	45	051	01248005	0500000US45051	-0.0215443	Northern conglomerate
244	45	019	01252740	0500000US45019	-2.35116e-05	Central conglomerate
245	45	051	01248005	0500000US45051	0.0264681	Northern conglomerate
246	45	051	01248005	0500000US45051	1.17516e-05	Northern conglomerate
247	45	051	01248005	0500000US45051	2.6746e-05	Northern conglomerate
248	45	015	01247985	0500000US45015	-3.70769e-05	Central conglomerate
249	45	051	01248005	0500000US45051	-4.27264e-05	Northern conglomerate
250	45	051	01248005	0500000US45051	3.12361e-05	Northern conglomerate
251	45	035	01247998	0500000US45035	4.57256e-05	Central conglomerate
252	45	051	01248005	0500000US45051	0.00766198	Northern conglomerate
253	45	051	01248005	0500000US45051	0.00013787	Northern conglomerate
254	45	015	01247985	0500000US45015	5.84937e-05	Central conglomerate
255	45	051	01248005	0500000US45051	-2.02084e-05	Northern conglomerate
256	45	043	01248002	0500000US45043	1.44608e-05	Northern conglomerate
257	45	019	01252740	0500000US45019	-0.13237	Central conglomerate
258	45	051	01248005	0500000US45051	0.0150604	Northern conglomerate
259	45	043	01248002	0500000US45043	-0.000103605	Northern conglomerate
260	45	051	01248005	0500000US45051	0.00192577	Northern conglomerate
261	45	019	01252740	0500000US45019	-1.00003e-13	Central conglomerate
262	45	015	01247985	0500000US45015	-5.57844e-06	Central conglomerate
263	45	019	01252740	0500000US45019	-1.00003e-13	Central conglomerate
264	45	019	01252740	0500000US45019	-2.26372e-06	Central conglomerate
265	45	015	01247985	0500000US45015	1.12541e-05	Central conglomerate
266	45	051	01248005	0500000US45051	5.77604e-05	Northern conglomerate
267	45	051	01248005	0500000US45051	4.28483e-05	Northern conglomerate
268	45	015	01247985	0500000US45015	0	Central conglomerate
269	45	035	01247998	0500000US45035	-1.28679e-05	Central conglomerate
270	45	051	01248005	0500000US45051	-0.062034	Northern conglomerate
271	45	051	01248005	0500000US45051	4.92922e-05	Northern conglomerate
272	45	015	01247985	0500000US45015	-2.32781e-06	Central conglomerate
273	45	035	01247998	0500000US45035	-0.146638	Central conglomerate
274	45	051	01248005	0500000US45051	0.0157703	Northern conglomerate
275	45	043	01248002	0500000US45043	7.76843e-06	Northern conglomerate
276	45	015	01247985	0500000US45015	2.55482e-05	Central conglomerate
277	45	051	01248005	0500000US45051	-3.57289e-05	Northern conglomerate
278	45	051	01248005	0500000US45051	0	Northern conglomerate
279	45	019	01252740	0500000US45019	-2.714e-06	Central conglomerate
280	45	019	01252740	0500000US45019	-1.29751e-05	Central conglomerate
281	45	051	01248005	0500000US45051	2.43405e-05	Northern conglomerate
282	45	051	01248005	0500000US45051	-2.73527e-05	Northern conglomerate
283	45	019	01252740	0500000US45019	0	Central conglomerate
284	45	015	01247985	0500000US45015	0.0102109	Central conglomerate
285	45	051	01248005	0500000US45051	-6.34332e-06	Northern conglomerate
286	45	051	01248005	0500000US45051	5.01472e-06	Northern conglomerate
287	45	035	01247998	0500000US45035	1.408e-06	Central conglomerate
288	45	013	01247984	0500000US45013	0.0376344	Southern conglomerate
289	45	051	01248005	0500000US45051	-4.2108e-06	Northern conglomerate
290	45	051	01248005	0500000US45051	0.0075362	Northern conglomerate
291	45	035	01247998	0500000US45035	4.86941e-06	Central conglomerate
292	45	013	01247984	0500000US45013	0.12589	Southern conglomerate
293	45	019	01252740	0500000US45019	-1.06673e-05	Central conglomerate
294	45	019	01252740	0500000US45019	-2.25461e-05	Central conglomerate
295	45	051	01248005	0500000US45051	1.46916e-05	Northern conglomerate
296	45	035	01247998	0500000US45035	0.0101345	Central conglomerate
297	45	051	01248005	0500000US45051	-2.74845e-05	Northern conglomerate
298	45	015	01247985	0500000US45015	6.58455e-06	Central conglomerate
299	45	051	01248005	0500000US45051	7.20799e-05	Northern conglomerate
300	45	051	01248005	0500000US45051	-0.0649867	Northern conglomerate
301	45	035	01247998	0500000US45035	1.26183e-05	Central conglomerate
302	45	051	01248005	0500000US45051	5.39341e-05	Northern conglomerate
303	45	015	01247985	0500000US45015	-2.57544e-05	Central conglomerate
304	45	019	01252740	0500000US45019	-1.00003e-13	Central conglomerate
305	45	019	01252740	0500000US45019	-0.104931	Central conglomerate
306	45	019	01252740	0500000US45019	-0.000153797	Central conglomerate
307	45	015	01247985	0500000US45015	-0.11205	Central conglomerate
308	45	019	01252740	0500000US45019	-2.17016e-05	Central conglomerate
309	45	015	01247985	0500000US45015	5.86989e-05	Central conglomerate
310	45	051	01248005	0500000US45051	5.0198e-06	Northern conglomerate
311	45	051	01248005	0500000US45051	-7.96619e-06	Northern conglomerate
312	45	051	01248005	0500000US45051	0.0650973	Northern conglomerate
313	45	051	01248005	0500000US45051	-7.94102e-06	Northern conglomerate
314	45	051	01248005	0500000US45051	-5.25746e-05	Northern conglomerate
315	45	051	01248005	0500000US45051	0.176508	Northern conglomerate
316	45	051	01248005	0500000US45051	1.93529e-05	Northern conglomerate
317	45	051	01248005	0500000US45051	5.14636e-06	Northern conglomerate
318	45	051	01248005	0500000US45051	1.37615e-05	Northern conglomerate
319	45	051	01248005	0500000US45051	-1.16323e-05	Northern conglomerate
320	45	019	01252740	0500000US45019	-0.0208143	Central conglomerate
321	45	051	01248005	0500000US45051	-7.65878e-06	Northern conglomerate
322	45	051	01248005	0500000US45051	2.01164e-05	Northern conglomerate
323	45	035	01247998	0500000US45035	3.3909e-05	Central conglomerate
324	45	019	01252740	0500000US45019	6.3068e-08	Central conglomerate
325	45	019	01252740	0500000US45019	-0.000185216	Central conglomerate
326	45	051	01248005	0500000US45051	7.14338e-06	Northern conglomerate
327	45	051	01248005	0500000US45051	3.39759e-06	Northern conglomerate
328	45	051	01248005	0500000US45051	1.51709e-05	Northern conglomerate
329	45	035	01247998	0500000US45035	0	Central conglomerate
330	45	035	01247998	0500000US45035	0.000100815	Central conglomerate
331	45	051	01248005	0500000US45051	-4.3378e-06	Northern conglomerate
332	45	051	01248005	0500000US45051	3.39635e-06	Northern conglomerate
333	45	015	01247985	0500000US45015	1.72206e-05	Central conglomerate
334	45	051	01248005	0500000US45051	3.22526e-05	Northern conglomerate
335	45	051	01248005	0500000US45051	-0.0313631	Northern conglomerate
336	45	019	01252740	0500000US45019	-1.84769e-05	Central conglomerate
337	45	019	01252740	0500000US45019	0.0753473	Central conglomerate
338	45	019	01252740	0500000US45019	-6.28954e-07	Central conglomerate
339	45	019	01252740	0500000US45019	-0.00336884	Central conglomerate
340	45	051	01248005	0500000US45051	1.38551e-06	Northern conglomerate
341	45	019	01252740	0500000US45019	-5.82567e-05	Central conglomerate
342	45	015	01247985	0500000US45015	3.97547e-06	Central conglomerate
343	45	051	01248005	0500000US45051	-1.81908e-06	Northern conglomerate
344	45	019	01252740	0500000US45019	-1.34488e-05	Central conglomerate
345	45	051	01248005	0500000US45051	7.95345e-06	Northern conglomerate
346	45	051	01248005	0500000US45051	-1.7e-12	Northern conglomerate
347	45	015	01247985	0500000US45015	2.48209e-05	Central conglomerate
348	45	051	01248005	0500000US45051	-3.46289e-07	Northern conglomerate
349	45	051	01248005	0500000US45051	0.0782995	Northern conglomerate
350	45	015	01247985	0500000US45015	1.60854e-06	Central conglomerate
351	45	019	01252740	0500000US45019	0.0622327	Central conglomerate
352	45	013	01247984	0500000US45013	0.116431	Southern conglomerate
353	45	019	01252740	0500000US45019	-2.43964e-05	Central conglomerate
354	45	043	01248002	0500000US45043	0.0837748	Northern conglomerate
355	45	019	01252740	0500000US45019	-0.0886674	Central conglomerate
356	45	051	01248005	0500000US45051	-4.84379e-06	Northern conglomerate
357	45	019	01252740	0500000US45019	-1.51412e-05	Central conglomerate
358	45	051	01248005	0500000US45051	-0.0563417	Northern conglomerate
359	45	035	01247998	0500000US45035	2.76209e-05	Central conglomerate
360	45	051	01248005	0500000US45051	-0.0150781	Northern conglomerate
361	45	051	01248005	0500000US45051	-2.03945e-05	Northern conglomerate
362	45	035	01247998	0500000US45035	0	Central conglomerate
363	45	051	01248005	0500000US45051	-2.22807e-05	Northern conglomerate
364	45	051	01248005	0500000US45051	-0.0398572	Northern conglomerate
365	45	019	01252740	0500000US45019	0.000128563	Central conglomerate
366	45	043	01248002	0500000US45043	-0.0125899	Northern conglomerate
367	45	051	01248005	0500000US45051	-2.3e-13	Northern conglomerate
368	45	051	01248005	0500000US45051	-4.12343e-06	Northern conglomerate
369	45	019	01252740	0500000US45019	8.05995e-06	Central conglomerate
370	45	043	01248002	0500000US45043	-1.18993e-05	Northern conglomerate
371	45	043	01248002	0500000US45043	-1.72265e-05	Northern conglomerate
372	45	015	01247985	0500000US45015	1.06226e-05	Central conglomerate
373	45	035	01247998	0500000US45035	0.000285162	Central conglomerate
374	45	051	01248005	0500000US45051	-2.11514e-06	Northern conglomerate
375	45	019	01252740	0500000US45019	3.65965e-07	Central conglomerate
376	45	051	01248005	0500000US45051	1.85606e-05	Northern conglomerate
377	45	051	01248005	0500000US45051	-0.000173457	Northern conglomerate
378	45	019	01252740	0500000US45019	-1.92123e-05	Central conglomerate
379	45	015	01247985	0500000US45015	-0.0415421	Central conglomerate
380	45	051	01248005	0500000US45051	-1.87623e-05	Northern conglomerate
381	45	051	01248005	0500000US45051	5.98851e-06	Northern conglomerate
382	45	051	01248005	0500000US45051	0	Northern conglomerate
383	45	051	01248005	0500000US45051	0.0549557	Northern conglomerate
384	45	013	01247984	0500000US45013	4.06019e-06	Southern conglomerate
385	45	051	01248005	0500000US45051	-0.0556047	Northern conglomerate
386	45	019	01252740	0500000US45019	-8.33485e-06	Central conglomerate
387	45	051	01248005	0500000US45051	4.8318e-06	Northern conglomerate
388	45	019	01252740	0500000US45019	-0.00711508	Central conglomerate
389	45	013	01247984	0500000US45013	0.126878	Southern conglomerate
390	45	019	01252740	0500000US45019	-1.00001e-12	Central conglomerate
391	45	051	01248005	0500000US45051	7.87653e-05	Northern conglomerate
392	45	035	01247998	0500000US45035	-0.0192584	Central conglomerate
393	45	051	01248005	0500000US45051	1.71859e-06	Northern conglomerate
394	45	015	01247985	0500000US45015	5.7992e-05	Central conglomerate
395	45	019	01252740	0500000US45019	4.33094e-05	Central conglomerate
396	45	015	01247985	0500000US45015	3.23277e-05	Central conglomerate
397	45	051	01248005	0500000US45051	4.19634e-05	Northern conglomerate
398	45	019	01252740	0500000US45019	-0.0550625	Central conglomerate
399	45	019	01252740	0500000US45019	8.2944e-06	Central conglomerate
400	45	051	01248005	0500000US45051	-5.18074e-06	Northern conglomerate
401	45	051	01248005	0500000US45051	-3.13319e-05	Northern conglomerate
402	45	019	01252740	0500000US45019	-1.30361e-05	Central conglomerate
403	45	043	01248002	0500000US45043	1.88045e-06	Northern conglomerate
404	45	013	01247984	0500000US45013	0.144706	Southern conglomerate
405	45	051	01248005	0500000US45051	-1.86857e-07	Northern conglomerate
406	45	051	01248005	0500000US45051	0.309131	Northern conglomerate
407	45	051	01248005	0500000US45051	0.000116283	Northern conglomerate
408	45	051	01248005	0500000US45051	-3.63327e-05	Northern conglomerate
409	45	019	01252740	0500000US45019	-1.90237e-06	Central conglomerate
410	45	051	01248005	0500000US45051	8.72702e-06	Northern conglomerate
411	45	019	01252740	0500000US45019	0	Central conglomerate
412	45	051	01248005	0500000US45051	0.094565	Northern conglomerate
413	45	051	01248005	0500000US45051	0.131988	Northern conglomerate
414	45	051	01248005	0500000US45051	2.80747e-06	Northern conglomerate
415	45	051	01248005	0500000US45051	-2.95242e-05	Northern conglomerate
416	45	019	01252740	0500000US45019	-7.2445e-06	Central conglomerate
417	45	051	01248005	0500000US45051	0.117751	Northern conglomerate
418	45	019	01252740	0500000US45019	-3.24013e-06	Central conglomerate
419	45	051	01248005	0500000US45051	4.95733e-05	Northern conglomerate
420	45	051	01248005	0500000US45051	0.0521751	Northern conglomerate
421	45	051	01248005	0500000US45051	2.47389e-05	Northern conglomerate
422	45	051	01248005	0500000US45051	0.060557	Northern conglomerate
423	45	019	01252740	0500000US45019	-4.8358e-07	Central conglomerate
424	45	051	01248005	0500000US45051	1.65312e-05	Northern conglomerate
425	45	051	01248005	0500000US45051	0.00516502	Northern conglomerate
426	45	051	01248005	0500000US45051	-2.01198e-05	Northern conglomerate
427	45	051	01248005	0500000US45051	1.63485e-05	Northern conglomerate
428	45	015	01247985	0500000US45015	-0.132019	Central conglomerate
429	45	015	01247985	0500000US45015	-1.12618e-05	Central conglomerate
430	45	051	01248005	0500000US45051	-5.027e-05	Northern conglomerate
431	45	051	01248005	0500000US45051	0	Northern conglomerate
432	45	051	01248005	0500000US45051	2.45381e-06	Northern conglomerate
433	45	019	01252740	0500000US45019	-0.00133777	Central conglomerate
434	45	019	01252740	0500000US45019	-3.97445e-06	Central conglomerate
435	45	019	01252740	0500000US45019	1.49771e-05	Central conglomerate
436	45	015	01247985	0500000US45015	1.82919e-06	Central conglomerate
437	45	019	01252740	0500000US45019	1.77533e-07	Central conglomerate
438	45	035	01247998	0500000US45035	0	Central conglomerate
439	45	015	01247985	0500000US45015	7.75651e-05	Central conglomerate
440	45	051	01248005	0500000US45051	-8.21184e-05	Northern conglomerate
441	45	019	01252740	0500000US45019	0.00774489	Central conglomerate
442	45	035	01247998	0500000US45035	1.17496e-05	Central conglomerate
443	45	051	01248005	0500000US45051	-0.000122649	Northern conglomerate
444	45	015	01247985	0500000US45015	1.32764e-05	Central conglomerate
445	45	051	01248005	0500000US45051	2.24056e-05	Northern conglomerate
446	45	051	01248005	0500000US45051	5.0716e-06	Northern conglomerate
447	45	019	01252740	0500000US45019	-3.02793e-06	Central conglomerate
448	45	051	01248005	0500000US45051	-3.54692e-06	Northern conglomerate
449	45	015	01247985	0500000US45015	-1.19546e-05	Central conglomerate
450	45	051	01248005	0500000US45051	1.19382e-05	Northern conglomerate
451	45	051	01248005	0500000US45051	1.63483e-06	Northern conglomerate
452	45	043	01248002	0500000US45043	-4.62424e-06	Northern conglomerate
453	45	051	01248005	0500000US45051	-2.05872e-05	Northern conglomerate
454	45	015	01247985	0500000US45015	-1.70222e-05	Central conglomerate
455	45	043	01248002	0500000US45043	6.42843e-05	Northern conglomerate
456	45	051	01248005	0500000US45051	-1.95755e-06	Northern conglomerate
457	45	051	01248005	0500000US45051	7.18739e-06	Northern conglomerate
458	45	051	01248005	0500000US45051	-0.0205123	Northern conglomerate
459	45	051	01248005	0500000US45051	0.111277	Northern conglomerate
460	45	051	01248005	0500000US45051	-0.000662839	Northern conglomerate
461	45	019	01252740	0500000US45019	-1.31447e-05	Central conglomerate
462	45	019	01252740	0500000US45019	-3.00162e-05	Central conglomerate
463	45	019	01252740	0500000US45019	-0.0172731	Central conglomerate
464	45	051	01248005	0500000US45051	0.000166058	Northern conglomerate
465	45	015	01247985	0500000US45015	2.41951e-06	Central conglomerate
466	45	043	01248002	0500000US45043	-6.87446e-06	Northern conglomerate
467	45	051	01248005	0500000US45051	1.39308e-05	Northern conglomerate
468	45	051	01248005	0500000US45051	-0.0126952	Northern conglomerate
469	45	053	01248006	0500000US45053	-5.18025e-06	Southern conglomerate
470	45	013	01247984	0500000US45013	2.56177e-05	Southern conglomerate
471	45	051	01248005	0500000US45051	1.41563e-05	Northern conglomerate
472	45	019	01252740	0500000US45019	-0.0669185	Central conglomerate
473	45	043	01248002	0500000US45043	-0.0133419	Northern conglomerate
474	45	051	01248005	0500000US45051	4.06338e-05	Northern conglomerate
475	45	051	01248005	0500000US45051	0.000180419	Northern conglomerate
476	45	019	01252740	0500000US45019	4.45657e-06	Central conglomerate
477	45	035	01247998	0500000US45035	0	Central conglomerate
478	45	019	01252740	0500000US45019	3.87649e-05	Central conglomerate
479	45	015	01247985	0500000US45015	9.98725e-06	Central conglomerate
480	45	019	01252740	0500000US45019	-0.0784225	Central conglomerate
481	45	019	01252740	0500000US45019	-3.03264e-05	Central conglomerate
482	45	051	01248005	0500000US45051	-9.30689e-06	Northern conglomerate
483	45	051	01248005	0500000US45051	8.89038e-06	Northern conglomerate
484	45	051	01248005	0500000US45051	-3.72822e-06	Northern conglomerate
485	45	015	01247985	0500000US45015	5.85336e-05	Central conglomerate
486	45	051	01248005	0500000US45051	-1.67106e-05	Northern conglomerate
487	45	019	01252740	0500000US45019	0.0753417	Central conglomerate
488	45	051	01248005	0500000US45051	5.55349e-05	Northern conglomerate
489	45	015	01247985	0500000US45015	1.47425e-06	Central conglomerate
490	45	051	01248005	0500000US45051	0.0039721	Northern conglomerate
491	45	043	01248002	0500000US45043	-2.00063e-05	Northern conglomerate
492	45	019	01252740	0500000US45019	0.15047	Central conglomerate
493	45	051	01248005	0500000US45051	-1.38103e-05	Northern conglomerate
494	45	019	01252740	0500000US45019	-0.00942408	Central conglomerate
495	45	019	01252740	0500000US45019	-3.06701e-06	Central conglomerate
496	45	051	01248005	0500000US45051	-1.81026e-06	Northern conglomerate
497	45	051	01248005	0500000US45051	3.84085e-05	Northern conglomerate
498	45	019	01252740	0500000US45019	-1.07276e-05	Central conglomerate
499	45	051	01248005	0500000US45051	0.0168559	Northern conglomerate
500	45	015	01247985	0500000US45015	1.38641e-05	Central conglomerate
501	45	051	01248005	0500000US45051	-3.69638e-05	Northern conglomerate
502	45	051	01248005	0500000US45051	6.6974e-05	Northern conglomerate
503	45	051	01248005	0500000US45051	-0.00532424	Northern conglomerate
504	45	043	01248002	0500000US45043	-4.19367e-05	Northern conglomerate
505	45	051	01248005	0500000US45051	2.74914e-05	Northern conglomerate
506	45	015	01247985	0500000US45015	0.0104219	Central conglomerate
507	45	035	01247998	0500000US45035	7.00429e-05	Central conglomerate
508	45	051	01248005	0500000US45051	-2.66932e-05	Northern conglomerate
509	45	051	01248005	0500000US45051	4.00821e-05	Northern conglomerate
510	45	015	01247985	0500000US45015	-0.11287	Central conglomerate
511	45	015	01247985	0500000US45015	-2.0128e-07	Central conglomerate
512	45	015	01247985	0500000US45015	1.41559e-05	Central conglomerate
513	45	051	01248005	0500000US45051	-0.0099551	Northern conglomerate
514	45	051	01248005	0500000US45051	-1.89349e-06	Northern conglomerate
515	45	019	01252740	0500000US45019	0	Central conglomerate
516	45	035	01247998	0500000US45035	1.82941e-05	Central conglomerate
517	45	051	01248005	0500000US45051	4.51918e-07	Northern conglomerate
518	45	051	01248005	0500000US45051	-8.97062e-06	Northern conglomerate
519	45	013	01247984	0500000US45013	0.0947285	Southern conglomerate
520	45	051	01248005	0500000US45051	0	Northern conglomerate
521	45	043	01248002	0500000US45043	4.47128e-05	Northern conglomerate
522	45	051	01248005	0500000US45051	-9.43959e-05	Northern conglomerate
523	45	051	01248005	0500000US45051	-3.62844e-06	Northern conglomerate
524	45	051	01248005	0500000US45051	4.35313e-05	Northern conglomerate
525	45	035	01247998	0500000US45035	2.05728e-05	Central conglomerate
526	45	019	01252740	0500000US45019	0.0181868	Central conglomerate
527	45	051	01248005	0500000US45051	-5.70309e-05	Northern conglomerate
528	45	035	01247998	0500000US45035	-2.38276e-05	Central conglomerate
529	45	051	01248005	0500000US45051	-0.00204815	Northern conglomerate
530	45	051	01248005	0500000US45051	0.0516727	Northern conglomerate
531	45	013	01247984	0500000US45013	0.0993758	Southern conglomerate
532	45	015	01247985	0500000US45015	5.86203e-06	Central conglomerate
533	45	051	01248005	0500000US45051	0.000631614	Northern conglomerate
534	45	051	01248005	0500000US45051	-5.13155e-05	Northern conglomerate
535	45	015	01247985	0500000US45015	4.92172e-05	Central conglomerate
536	45	015	01247985	0500000US45015	0.00713798	Central conglomerate
537	45	043	01248002	0500000US45043	3.1035e-06	Northern conglomerate
538	45	035	01247998	0500000US45035	0.000125531	Central conglomerate
539	45	019	01252740	0500000US45019	0	Central conglomerate
540	45	019	01252740	0500000US45019	0.000163443	Central conglomerate
541	45	019	01252740	0500000US45019	0.0753218	Central conglomerate
542	45	051	01248005	0500000US45051	-3.50482e-05	Northern conglomerate
543	45	015	01247985	0500000US45015	-4.65349e-05	Central conglomerate
544	45	035	01247998	0500000US45035	0	Central conglomerate
545	45	013	01247984	0500000US45013	-0.000133612	Southern conglomerate
546	45	051	01248005	0500000US45051	0.0291472	Northern conglomerate
547	45	051	01248005	0500000US45051	3.19327e-06	Northern conglomerate
548	45	051	01248005	0500000US45051	-4.33168e-07	Northern conglomerate
549	45	019	01252740	0500000US45019	0.10096	Central conglomerate
550	45	051	01248005	0500000US45051	-0.00471606	Northern conglomerate
551	45	035	01247998	0500000US45035	0.000209855	Central conglomerate
552	45	051	01248005	0500000US45051	6.65413e-06	Northern conglomerate
553	45	051	01248005	0500000US45051	-3.53585e-06	Northern conglomerate
554	45	015	01247985	0500000US45015	-6.42544e-06	Central conglomerate
555	45	051	01248005	0500000US45051	7.84139e-06	Northern conglomerate
556	45	051	01248005	0500000US45051	0.131543	Northern conglomerate
557	45	051	01248005	0500000US45051	-3.10497e-06	Northern conglomerate
558	45	051	01248005	0500000US45051	-6.15053e-06	Northern conglomerate
559	45	051	01248005	0500000US45051	4.64062e-07	Northern conglomerate
560	45	051	01248005	0500000US45051	-6.72468e-06	Northern conglomerate
561	45	051	01248005	0500000US45051	-0.0594024	Northern conglomerate
562	45	019	01252740	0500000US45019	9.68538e-06	Central conglomerate
563	45	051	01248005	0500000US45051	1.45122e-05	Northern conglomerate
564	45	019	01252740	0500000US45019	-4.08758e-05	Central conglomerate
565	45	051	01248005	0500000US45051	-2.20354e-05	Northern conglomerate
566	45	051	01248005	0500000US45051	0.00954486	Northern conglomerate
567	45	015	01247985	0500000US45015	1.4549e-05	Central conglomerate
568	45	051	01248005	0500000US45051	-0.037848	Northern conglomerate
569	45	015	01247985	0500000US45015	1.20892e-05	Central conglomerate
570	45	051	01248005	0500000US45051	2.77875e-05	Northern conglomerate
571	45	051	01248005	0500000US45051	-0.056665	Northern conglomerate
572	45	051	01248005	0500000US45051	0	Northern conglomerate
573	45	043	01248002	0500000US45043	-2.8917e-05	Northern conglomerate
574	45	035	01247998	0500000US45035	3.77273e-05	Central conglomerate
575	45	019	01252740	0500000US45019	5.82139e-05	Central conglomerate
576	45	035	01247998	0500000US45035	0.0213085	Central conglomerate
577	45	035	01247998	0500000US45035	1.12599e-05	Central conglomerate
578	45	035	01247998	0500000US45035	6.56842e-05	Central conglomerate
579	45	043	01248002	0500000US45043	7.97161e-06	Northern conglomerate
580	45	015	01247985	0500000US45015	9.45911e-06	Central conglomerate
581	45	019	01252740	0500000US45019	-0.0316257	Central conglomerate
582	45	051	01248005	0500000US45051	-1.46858e-05	Northern conglomerate
583	45	015	01247985	0500000US45015	2.83885e-06	Central conglomerate
584	45	019	01252740	0500000US45019	-6.76319e-05	Central conglomerate
585	45	015	01247985	0500000US45015	-0.165734	Central conglomerate
586	45	051	01248005	0500000US45051	-3.83148e-05	Northern conglomerate
587	45	019	01252740	0500000US45019	0.0846549	Central conglomerate
588	45	051	01248005	0500000US45051	-5.96279e-05	Northern conglomerate
589	45	019	01252740	0500000US45019	3.25723e-05	Central conglomerate
590	45	051	01248005	0500000US45051	0.0605444	Northern conglomerate
591	45	029	01247991	0500000US45029	5.34348e-06	Southern conglomerate
592	45	019	01252740	0500000US45019	2.43788e-06	Central conglomerate
593	45	013	01247984	0500000US45013	-3.78773e-05	Southern conglomerate
594	45	051	01248005	0500000US45051	5.32319e-06	Northern conglomerate
595	45	019	01252740	0500000US45019	1.02567e-05	Central conglomerate
596	45	019	01252740	0500000US45019	0.101003	Central conglomerate
597	45	051	01248005	0500000US45051	0.00396607	Northern conglomerate
598	45	015	01247985	0500000US45015	2.63692e-06	Central conglomerate
599	45	019	01252740	0500000US45019	2.4992e-07	Central conglomerate
600	45	051	01248005	0500000US45051	-7.82544e-06	Northern conglomerate

## Sheet: Twitted_InAndOut_CostalCounties
id	STATEFP	COUNTYFP	Cnglmera_1
1	45	019	Central conglomerate
2	45	019	Central conglomerate
3	45	019	Central conglomerate
4	45	043	Northern conglomerate
5	45	035	Central conglomerate
6	45	019	Central conglomerate
7	45	051	Northern conglomerate
8	45	035	Central conglomerate
9	45	019	Central conglomerate
10	45	013	Southern conglomerate
11	45	019	Central conglomerate
12	45	019	Central conglomerate
13	45	013	Southern conglomerate
14	45	051	Northern conglomerate
15	45	013	Southern conglomerate
16	45	015	Central conglomerate
17	45	051	Northern conglomerate
18	45	051	Northern conglomerate
19	45	051	Northern conglomerate
20	45	051	Northern conglomerate
21	45	019	Central conglomerate
22	45	051	Northern conglomerate
23	45	019	Central conglomerate
24	45	019	Central conglomerate
25	45	051	Northern conglomerate
26	45	013	Southern conglomerate
27	45	029	Southern conglomerate
28	45	019	Central conglomerate
29	45	019	Central conglomerate
30	45	019	Central conglomerate
31	45	013	Southern conglomerate
32	45	013	Southern conglomerate
33	45	019	Central conglomerate
34	45	051	Northern conglomerate
35	45	051	Northern conglomerate
36	45	019	Central conglomerate
37	45	013	Southern conglomerate

## Sheet: Evacuation RESULTS
		Users	%			no local
	Total	1384	1			361		0.793123
	Tweets Within and Beyond the risk counties	37	0.0267341
	County	Users	% Users	Pop. 2015	% Pop	Evacuated	% Evac.	Not Evac.	% Not Evac.
	Beaufort (SC)	94	0.0679191	179589	0.132035	73	0.776596	21	0.223404
	Berkeley (SC)	139	0.100434	202786	0.149089	66	0.47482	73	0.52518
	Charleston (SC)	343	0.247832	389262	0.286187	179	0.521866	164	0.478134
	Colleton (SC)	3	0.00216763	37731	0.02774	1	0.333333	2	0.666667
	Dorchester (SC)	78	0.0563584	152478	0.112102	35	0.448718	43	0.551282
	Georgetown (SC)	56	0.0404624	61298	0.0450665	24	0.428571	32	0.571429
	Horry (SC)	663	0.479046	309199	0.227324	362	0.546003	301	0.453997
	Jasper (SC)	8	0.00578035	27824	0.0204563	7	0.875	1	0.125
	TOTAL / AVERAGE	1384	1	1360167	1	747		637
	Region	Users	% Users	Pop. 2015	% Pop	Evacuated	% Evac.	Not Evac.	% Not Evac.
	Southern Conglomerate	105	0.0758671	245144	0.180231	81	0.771429	24	0.228571
	Central Conglomerate	560	0.404624	744526	0.547378	280	0.5	280	0.5
	Northern Conglomerate	719	0.519509	370497	0.272391	386	0.536857	333	0.463143
	TOTAL / AVERAGE	1384	1	1360167		747		637
	State	Users	%
	Not left South Carolina	341	0.456493
	North Carolina	136	0.182062				Region	Users	% Users	Pop. 2015	Evacuated	% Evac.
	Georgia	68	0.0910308				Southern	105	0.076	245144	81	0.771429
	Virginia	32	0.042838				Central	560	0.405	744526	280	0.5
	Pennsylvania	26	0.0348059				Northern	719	0.52	370497	386	0.536857
	Maryland	24	0.0321285				TOTAL	1384	1	1360167	747	0.53974
	New York	20	0.0267738
	Tennessee	19	0.0254351
	New Jersey	10	0.0133869
	Other states	71	0.0950469
	TOTAL	747	1
										Users	% Returned	% Accumulated
									Sun. 10/09 from 10am	82	0.109772	0.109772
									Mon. 10/10	139	0.186078	0.29585
									Tue. 10/11	111	0.148594	0.444444
									Wed. 10/12	113	0.151272	0.595716															Did not tweet	36	0.0481928
									Thu. 10/13	89	0.119143	0.714859
									Fri. 10/14	36	0.0481928	0.763052
									Sat. 10/15	27	0.0361446	0.799197											0.109772	0.29585	0.444444	0.595716	0.714859	0.763052	0.799197	0.860776	0.884873	0.907631	0.930388
									Sun. 10/16	19	0.0254351	0.824632											10/09	10/10	10/11	10/12	10/13	10/14	10/15	10/16	10/17	10/18	10/19
									Mon. 10/17	18	0.0240964	0.848728											82	139	111	113	89	36	27	19	18	17	17
									Tue. 10/18	17	0.0227577	0.871486
									Mon. 10/19	6	0.00803213	0.879518
									Not tweeted 10/09-10/19	60	0.0803213
									Not returned	30	0.0401606
									TOTAL	747	1
