# Supplementary material for: Leveraging Twitter to gauge evacuation compliance: Spatiotemporal analysis of Hurricane Matthew
Source: PLoS One. 2017 Jul 28;12(7):e0181701. doi: 10.1371/journal.pone.0181701 (PMC5533310; doi:10.1371/journal.pone.0181701)
Supplement: S2 File — (XLSX) [file pone.0181701.s002.xlsx]

## Sheet: Counties
STATEFP	GEOID	NAME	Population	TweetsPerCounty	CentroidToMatthew (km)	CntUser	MTA
13	13121	Fulton	1010562	1034	436.201	4898	0.211107
12	12086	Miami-Dade	2693117	6354	196.334	4884	1.30098
12	12011	Broward	1896425	5413	158.083	3035	1.78353
12	12095	Orange	1288126	4845	108.466	2918	1.66038
37	37119	Mecklenburg	1034070	959	254.077	2842	0.337438
12	12057	Hillsborough	1349050	1443	223.399	2418	0.596774
37	37183	Wake	1024198	1432	230.694	2288	0.625874
12	12099	Palm Beach	1422789	4065	126.588	1728	2.35243
12	12073	Leon	286272	804	349.223	1617	0.497217
37	37081	Guilford	517600	285	287.399	1427	0.19972
51	51059	Fairfax	1142234	197	468.943	1406	0.140114
12	12103	Pinellas	949827	913	261.145	1184	0.771115
51	51760	Richmond	220289	108	341.973	1004	0.10757
51	51710	Norfolk	246393	335	235.859	853	0.392732
13	13067	Cobb	741334	158	453.375	810	0.195062
51	51810	Virginia Beach	452745	379	213.126	810	0.467901
12	12127	Volusia	517887	1909	71.0299	795	2.40126
37	37063	Durham	300952	282	261.591	786	0.358779
12	12001	Alachua	259964	763	163.012	780	0.978205
13	13059	Clarke	123912	149	358.653	733	0.203274
45	45051	Horry	309199	1145	37.8975	707	1.61952
13	13089	DeKalb	734871	211	415.842	673	0.313522
12	12071	Lee	701982	544	245.854	642	0.847352
37	37067	Forsyth	369019	125	308.544	625	0.2
12	12105	Polk	650092	623	167.871	605	1.02975
51	51013	Arlington	229164	98	468.509	586	0.167235
13	13051	Chatham	286956	941	67.0122	568	1.65669
12	12117	Seminole	449144	1078	91.4598	555	1.94234
12	12101	Pasco	497909	324	213.517	537	0.603352
13	13031	Bulloch	72651	338	138.632	520	0.65
12	12009	Brevard	568088	1490	65.8103	489	3.04703
45	45045	Greenville	491863	236	336.537	489	0.482618
37	37051	Cumberland	323838	377	153.587	480	0.785417
13	13135	Gwinnett	895823	87	410.862	463	0.187905
51	51153	Prince William	451721	46	461.253	411	0.111922
51	51660	Harrisonburg	52538	22	490.668	401	0.0548628
51	51700	Newport News	182385	93	265.531	390	0.238462
37	37135	Orange	141354	168	269.027	385	0.436364
45	45019	Charleston	389262	972	24.604	374	2.59893
51	51650	Hampton	136454	121	255.787	371	0.326146
51	51121	Montgomery	97653	36	419.91	362	0.0994475
12	12033	Escambia	311003	120	646.669	360	0.333333
51	51680	Lynchburg	79812	28	414.098	360	0.0777778
45	45083	Spartanburg	297302	142	310.273	345	0.411594
51	51510	Alexandria	153511	46	461.635	337	0.136499
51	51107	Loudoun	375629	122	506.263	335	0.364179
45	45063	Lexington	281833	281	192.026	325	0.864615
13	13045	Carroll	114545	38	475.992	310	0.122581
45	45077	Pickens	121691	98	363.428	306	0.320261
37	37189	Watauga	52906	34	387.849	292	0.116438
13	13215	Muscogee	200579	48	418.654	285	0.168421
12	12031	Duval	913010	1468	98.3234	281	5.2242
51	51550	Chesapeake	235429	167	214.128	280	0.596429
37	37021	Buncombe	253178	65	394.656	279	0.232975
51	51750	Radford	17403	21	420.154	276	0.076087
12	12115	Sarasota	405549	215	260.356	275	0.781818
45	45079	Richland	407051	232	170.807	275	0.843636
12	12097	Osceola	323993	533	113.656	274	1.94526
13	13185	Lowndes	112865	63	254.979	267	0.235955
51	51087	Henrico	325155	48	339.989	267	0.179775
37	37025	Cabarrus	196762	75	250.396	264	0.284091
12	12111	St. Lucie	298563	851	84.11	257	3.31128
13	13245	Richmond	201793	117	222.184	247	0.473684
45	45091	York	251195	136	255.362	238	0.571429
12	12081	Manatee	363369	185	245.446	235	0.787234
51	51041	Chesterfield	335687	32	331.755	225	0.142222
12	12005	Bay	181635	95	477.35	212	0.448113
12	12019	Clay	203967	464	113.767	212	2.18868
37	37179	Union	222742	51	214.407	212	0.240566
13	13021	Bibb	153721	163	323.107	210	0.77619
37	37071	Gaston	213442	69	279.537	208	0.331731
12	12069	Lake	325875	349	131.613	205	1.70244
12	12109	St. Johns	226640	546	73.3488	200	2.73
12	12083	Marion	343254	226	144.279	198	1.14141
13	13153	Houston	150033	52	307.247	178	0.292135
37	37099	Jackson	41265	21	419.234	178	0.117978
51	51540	Charlottesville	46597	25	435.115	168	0.14881
37	37097	Iredell	169866	39	305.176	166	0.23494
13	13151	Henry	217739	44	392.537	163	0.269939
51	51770	Roanoke	99897	23	418.652	160	0.14375
12	12021	Collier	357305	128	232.803	151	0.847682
12	12035	Flagler	105392	301	67.2018	147	2.04762
45	45003	Aiken	165829	72	199.07	147	0.489796
12	12091	Okaloosa	198664	66	572.728	144	0.458333
45	45007	Anderson	194692	59	334.933	142	0.415493
45	45041	Florence	138900	168	84.1762	141	1.19149
13	13063	Clayton	273955	26	413.919	138	0.188406
37	37035	Catawba	155056	35	311.662	136	0.257353
37	37001	Alamance	158276	39	273.19	132	0.295455
13	13009	Baldwin	45459	13	298.212	131	0.0992366
37	37159	Rowan	139142	28	272.324	131	0.21374
13	13073	Columbia	144052	52	248.082	125	0.416
51	51630	Fredericksburg	28118	11	419.874	125	0.088
12	12113	Santa Rosa	167040	40	614.03	124	0.322581
51	51740	Portsmouth	96201	58	233.39	122	0.47541
13	13097	Douglas	140733	32	455.963	120	0.266667
12	12053	Hernando	178439	74	204.601	117	0.632479
13	13057	Cherokee	235900	34	462.893	115	0.295652
51	51147	Prince Edward	22952	8	358.514	114	0.0701754
51	51085	Hanover	103227	23	365.565	113	0.20354
37	37129	New Hanover	220358	201	47.2004	111	1.81081
12	12061	Indian River	147919	310	81.8007	108	2.87037
37	37085	Harnett	128140	46	189.034	107	0.429907
45	45013	Beaufort	179589	273	57.9055	106	2.57547
51	51840	Winchester	27284	13	532.784	102	0.127451
13	13127	Glynn	83579	207	89.0322	99	2.09091
12	12085	Martin	156283	351	98.0519	98	3.58163
37	37155	Robeson	134197	57	116.204	97	0.587629
45	45015	Berkeley	202786	218	46.6076	97	2.24742
45	45035	Dorchester	152478	186	74.9189	87	2.13793
45	45075	Orangeburg	89208	35	127.496	87	0.402299
37	37045	Cleveland	96879	18	307.135	85	0.211765
45	45047	Greenwood	69838	17	273.604	85	0.2
51	51800	Suffolk	88161	32	226.61	83	0.385542
13	13115	Floyd	96504	16	522.25	82	0.195122
51	51683	Manassas	41764	8	466.053	79	0.101266
37	37191	Wayne	124132	80	169.442	77	1.03896
12	12015	Charlotte	173115	54	235.663	76	0.710526
51	51149	Prince George	37862	18	297.867	74	0.243243
37	37127	Nash	93919	38	222.378	73	0.520548
37	37133	Onslow	186311	63	81.5847	73	0.863014
13	13139	Hall	193535	8	415.548	72	0.111111
13	13285	Troup	69763	7	448.564	72	0.0972222
51	51830	Williamsburg	15052	13	288.187	72	0.180556
13	13015	Bartow	102747	10	491.239	71	0.140845
37	37195	Wilson	81714	35	195.434	71	0.492958
51	51590	Danville	42082	7	331.323	71	0.0985915
37	37049	Craven	103451	59	98.7473	70	0.842857
45	45085	Sumter	107480	55	124.527	70	0.785714
51	51165	Rockingham	78593	10	497.967	67	0.149254
13	13077	Coweta	138427	13	438.624	66	0.19697
13	13297	Walton	88399	10	377.488	66	0.151515
13	13113	Fayette	110714	18	418.689	64	0.28125
45	45043	Georgetown	61298	116	14.6394	62	1.87097
51	51161	Roanoke	94409	20	420.525	62	0.322581
37	37057	Davidson	164622	13	273.051	60	0.216667
51	51600	Fairfax	24013	13	471.38	60	0.216667
13	13313	Whitfield	104216	8	533.723	59	0.135593
13	13225	Peach	26720	9	325.422	58	0.155172
37	37101	Johnston	185660	155	195.901	58	2.67241
45	45021	Cherokee	56194	14	291.021	58	0.241379
13	13187	Lumpkin	31408	3	444.76	55	0.0545455
37	37151	Randolph	142799	14	249.557	55	0.254545
45	45031	Darlington	67548	32	125.114	55	0.581818
51	51061	Fauquier	68782	4	475.912	55	0.0727273
12	12017	Citrus	141058	32	196.526	54	0.592593
13	13039	Camden	52102	125	102.068	52	2.40385
51	51775	Salem	25432	9	421.958	52	0.173077
37	37019	Brunswick	122765	162	36.2188	51	3.17647
37	37109	Lincoln	81035	7	297.626	50	0.14
37	37157	Rockingham	91758	4	320.312	50	0.08
13	13179	Liberty	62467	117	90.8357	48	2.4375
13	13023	Bleckley	12243	1	276.108	47	0.0212766
12	12089	Nassau	78444	90	113.662	44	2.04545
13	13013	Barrow	75370	7	388.207	44	0.159091
13	13255	Spalding	64051	5	393.704	44	0.113636
13	13277	Tift	40764	14	277.933	44	0.318182
37	37139	Pasquotank	39829	16	173.451	43	0.372093
45	45055	Kershaw	63603	23	168.213	42	0.547619
13	13247	Rockdale	88856	4	393.251	41	0.097561
37	37125	Moore	94352	30	197.742	41	0.731707
51	51730	Petersburg	32477	4	306.493	41	0.097561
13	13047	Catoosa	66050	13	552.817	40	0.325
37	37089	Henderson	112655	13	372.683	40	0.325
45	45071	Newberry	38012	9	240.732	40	0.225
37	37055	Dare	35663	78	103.068	39	2
37	37105	Lee	59660	24	206.921	39	0.615385
51	51179	Stafford	142003	5	431.464	39	0.128205
13	13157	Jackson	63360	3	384.938	38	0.0789474
13	13171	Lamar	18201	0	372.929	38	0
37	37107	Lenoir	58106	34	138.889	36	0.944444
51	51047	Culpeper	49432	1	455.861	35	0.0285714
51	51570	Colonial Heights	17820	4	312.636	35	0.114286
13	13261	Sumter	30779	3	345.973	34	0.0882353
37	37027	Caldwell	81287	3	355.633	34	0.0882353
45	45073	Oconee	75713	15	381.964	33	0.454545
12	12023	Columbia	68348	45	188.626	32	1.40625
13	13275	Thomas	45063	7	317.185	32	0.21875
37	37031	Carteret	68879	62	48.4728	32	1.9375
51	51790	Staunton	24416	2	474.671	32	0.0625
13	13299	Ware	35370	47	173.666	31	1.51613
37	37147	Pitt	175842	28	155.969	31	0.903226
13	13069	Coffee	43108	8	213.83	30	0.266667
51	51820	Waynesboro	21491	1	458.269	30	0.0333333
13	13223	Paulding	152238	2	475.602	29	0.0689655
37	37091	Hertford	24184	10	206.495	29	0.344828
12	12087	Monroe	77482	51	264.262	28	1.82143
13	13217	Newton	105473	5	373.538	28	0.178571
12	12131	Walton	63508	12	531.97	27	0.444444
13	13107	Emanuel	22708	8	194.751	27	0.296296
13	13175	Laurens	47731	14	241.389	27	0.518519
37	37083	Halifax	52456	13	230.247	27	0.481481
37	37115	Madison	21139	4	424.105	27	0.148148
51	51690	Martinsville	13645	1	352.929	26	0.0384615
13	13295	Walker	68066	6	555.983	25	0.24
37	37023	Burke	88842	6	348.86	25	0.24
37	37165	Scotland	35509	18	149.19	25	0.72
37	37171	Surry	72743	1	353.899	25	0.04
37	37175	Transylvania	33211	5	387.974	25	0.2
51	51015	Augusta	74314	4	478.871	25	0.16
12	12093	Okeechobee	39469	37	121.308	24	1.54167
51	51670	Hopewell	22378	1	311.152	24	0.0416667
12	12055	Highlands	99491	35	163.991	23	1.52174
13	13257	Stephens	25586	6	388.206	23	0.26087
37	37047	Columbus	56694	27	65.375	23	1.17391
45	45057	Lancaster	85842	15	201.414	23	0.652174
12	12119	Sumter	118891	34	167.062	22	1.54545
13	13029	Bryan	35137	36	93.7068	22	1.63636
51	51685	Manassas Park	15726	0	467.106	22	0
51	51735	Poquoson	12059	6	263.543	22	0.272727
37	37161	Rutherford	66390	5	337.055	21	0.238095
45	45059	Laurens	66623	8	283.72	21	0.380952
51	51031	Campbell	55086	1	391.892	21	0.047619
13	13103	Effingham	57106	37	104.881	20	1.85
37	37069	Franklin	63710	8	248.794	20	0.4
13	13053	Chattahoochee	11368	8	406.668	19	0.421053
51	51089	Henry	51881	2	353.274	19	0.105263
37	37153	Richmond	45437	13	176.059	18	0.722222
51	51003	Albemarle	105703	1	437.183	18	0.0555556
13	13279	Toombs	27241	9	176.071	17	0.529412
37	37163	Sampson	63724	16	138.884	17	0.941176
51	51191	Washington	54591	0	445.23	17	0
51	51197	Wythe	29119	8	419.526	17	0.470588
12	12003	Baker	27420	21	157.124	16	1.3125
13	13129	Gordon	56574	5	509.186	16	0.3125
13	13137	Habersham	43996	3	411.264	16	0.1875
13	13177	Lee	29202	2	337.641	16	0.125
37	37167	Stanly	60714	6	228.255	16	0.375
37	37181	Vance	44568	3	280.441	16	0.1875
51	51678	Lexington	7262	3	461.336	16	0.1875
37	37169	Stokes	46351	2	335.351	15	0.133333
51	51171	Shenandoah	43190	0	517.328	15	0
51	51187	Warren	39083	6	507.694	15	0.4
12	12107	Putnam	72023	24	104.752	14	1.71429
13	13071	Colquitt	45844	4	301.478	14	0.285714
37	37037	Chatham	70928	13	233.269	14	0.928571
51	51137	Orange	35385	3	434.359	14	0.214286
51	51610	Falls Church	13892	1	471.202	14	0.0714286
12	12051	Hendry	39119	28	190.771	13	2.15385
13	13219	Oconee	35965	3	357.3	12	0.25
13	13233	Polk	41524	0	505.913	12	0
37	37065	Edgecombe	54150	17	196.428	12	1.41667
37	37087	Haywood	59868	4	423.939	12	0.333333
51	51019	Bedford	77724	1	412.709	12	0.0833333
51	51155	Pulaski	34332	5	419.596	12	0.416667
51	51195	Wise	39718	1	504.389	12	0.0833333
13	13117	Forsyth	212438	0	434.132	11	0
37	37059	Davie	41753	1	300.667	11	0.0909091
37	37077	Granville	58674	2	286.598	11	0.181818
37	37141	Pender	57611	34	79.2496	11	3.09091
45	45039	Fairfield	22747	8	210.829	11	0.727273
51	51117	Mecklenburg	31081	2	305.908	11	0.181818
51	51530	Buena Vista	6618	2	452.059	11	0.181818
13	13081	Crisp	22881	9	304.039	10	0.9
13	13087	Decatur	27174	0	380.255	10	0
13	13143	Haralson	28854	0	497.143	10	0
13	13293	Upson	26368	1	378.631	10	0.1
13	13311	White	28319	0	429.056	10	0
37	37013	Beaufort	47651	5	119.454	10	0.5
51	51093	Isle of Wight	36314	9	249.702	10	0.9
51	51167	Russell	27891	0	470.967	10	0
51	51580	Covington	5658	0	472.644	10	0
12	12049	Hardee	27502	5	199.109	9	0.555556
12	12063	Jackson	48599	1	441.462	9	0.111111
13	13033	Burke	22745	5	198.561	9	0.555556
13	13083	Dade	16264	2	578.793	9	0.222222
13	13211	Morgan	18046	7	347.332	9	0.777778
45	45025	Chesterfield	46017	12	162.93	9	1.33333
37	37041	Chowan	14394	3	170.034	8	0.375
37	37111	McDowell	44989	2	366.093	8	0.25
45	45027	Clarendon	33775	8	96.042	8	1
45	45087	Union	27777	1	267.016	8	0.125
51	51043	Clarke	14363	1	520.431	8	0.125
51	51057	Essex	11130	0	365.968	8	0
51	51065	Fluvanna	26235	4	407.105	8	0.5
51	51083	Halifax	35125	2	342.092	8	0.25
51	51135	Nottoway	15673	0	331.059	8	0
13	13019	Berrien	18963	0	249.86	7	0
13	13035	Butts	23593	4	367.727	7	0.571429
13	13049	Charlton	12965	11	147.035	7	1.57143
13	13065	Clinch	6893	5	201.062	7	0.714286
13	13207	Monroe	27103	3	351.292	7	0.428571
37	37145	Person	39259	2	301.793	7	0.285714
37	37193	Wilkes	68502	3	356.435	7	0.428571
51	51023	Botetourt	33347	0	444.882	7	0
51	51073	Gloucester	37143	2	298.515	7	0.285714
51	51139	Page	23726	4	490.54	7	0.571429
51	51173	Smyth	31470	3	433.792	7	0.428571
51	51185	Tazewell	42899	1	461.234	7	0.142857
12	12007	Bradford	26928	10	143.658	6	1.66667
12	12045	Gulf	15871	6	439.427	6	1
13	13001	Appling	18454	6	162.757	6	1
13	13155	Irwin	9245	1	254.56	6	0.166667
13	13161	Jeff Davis	14920	2	196.277	6	0.333333
13	13169	Jones	28494	3	321.578	6	0.5
13	13205	Mitchell	22574	1	341.934	6	0.166667
13	13237	Putnam	21353	0	322.186	6	0
13	13243	Randolph	7193	1	395.478	6	0.166667
37	37003	Alexander	37325	2	331.716	6	0.333333
37	37093	Hoke	52671	7	159.751	6	1.16667
45	45001	Abbeville	24932	2	303.608	6	0.333333
45	45033	Dillon	31234	6	99.9923	6	1
45	45067	Marion	31747	15	69.293	6	2.5
45	45069	Marlboro	27494	2	133.852	6	0.333333
51	51067	Franklin	56264	2	386.19	6	0.333333
51	51177	Spotsylvania	130475	0	414.367	6	0
51	51620	Franklin	8490	6	236.449	6	1
51	51720	Norton	3939	0	501.14	6	0
12	12039	Gadsden	46036	2	382.291	5	0.4
12	12125	Union	15234	7	163.573	5	1.4
13	13017	Ben Hill	17403	4	250.515	5	0.8
13	13091	Dodge	20882	1	253.496	5	0.2
13	13093	Dooly	14035	0	311.216	5	0
13	13109	Evans	10787	1	138.34	5	0.2
13	13213	Murray	39565	0	515.57	5	0
13	13305	Wayne	29534	9	125.448	5	1.8
37	37117	Martin	23357	4	163.975	5	0.8
45	45029	Colleton	37731	14	82.1566	5	2.8
51	51009	Amherst	31914	1	429.668	5	0.2
51	51101	King William	16269	2	345.716	5	0.4
51	51169	Scott	22126	1	481.889	5	0.2
51	51595	Emporia	5496	0	264.273	5	0
51	51640	Galax	6914	1	388.33	5	0.2
12	12027	DeSoto	35458	7	213.368	4	1.75
13	13055	Chattooga	24922	0	544.647	4	0
13	13133	Greene	16710	1	320.991	4	0.25
13	13163	Jefferson	16106	0	230.991	4	0
13	13165	Jenkins	8957	0	179.524	4	0
13	13287	Turner	8214	1	288.213	4	0.25
37	37061	Duplin	59159	4	124.164	4	1
45	45009	Bamberg	14880	5	133.871	4	1.25
45	45081	Saluda	20053	2	233.705	4	0.5
45	45089	Williamsburg	32535	3	56.3461	4	0.75
51	51005	Alleghany	15677	0	474.122	4	0
51	51071	Giles	16708	0	444.694	4	0
12	12121	Suwannee	43760	5	223.997	3	1.66667
12	12129	Wakulla	31535	5	359.415	3	1.66667
13	13095	Dougherty	91332	1	343.528	3	0.333333
13	13099	Early	10575	0	409.193	3	0
13	13105	Elbert	19364	2	327.13	3	0.666667
13	13189	McDuffie	21540	1	261.531	3	0.333333
13	13227	Pickens	30309	3	474.689	3	1
13	13229	Pierce	19103	6	152.99	3	2
13	13251	Screven	14162	3	149.354	3	1
13	13267	Tattnall	25229	10	148.97	3	3.33333
13	13273	Terrell	9113	2	365.603	3	0.666667
13	13317	Wilkes	9867	3	299.793	3	1
37	37131	Northampton	20426	1	231.701	3	0.333333
37	37187	Washington	12385	1	136.67	3	0.333333
37	37197	Yadkin	37585	2	328.289	3	0.666667
45	45005	Allendale	9433	1	143.759	3	0.333333
45	45049	Hampton	20049	2	113.958	3	0.666667
51	51001	Accomack	32973	2	314.908	3	0.666667
51	51099	King George	25515	0	406.634	3	0
51	51143	Pittsylvania	62194	0	356.795	3	0
12	12029	Dixie	16203	1	240.871	2	0.5
12	12041	Gilchrist	17199	0	205.27	2	0
12	12059	Holmes	19324	1	498.429	2	0.5
12	12133	Washington	24687	0	483.37	2	0
13	13005	Bacon	11299	0	176.214	2	0
13	13043	Candler	10886	5	166.079	2	2.5
13	13075	Cook	17124	2	269.381	2	1
13	13147	Hart	25534	3	350.638	2	1.5
13	13173	Lanier	10312	2	234.745	2	1
13	13191	McIntosh	13969	6	76.7425	2	3
13	13193	Macon	13632	0	338.453	2	0
13	13199	Meriwether	21190	0	418.942	2	0
13	13235	Pulaski	11396	0	283.217	2	0
13	13271	Telfair	16400	1	226.665	2	0.5
13	13283	Treutlen	6785	1	208.049	2	0.5
37	37009	Ashe	27020	2	394.649	2	1
37	37017	Bladen	34318	4	101.321	2	2
37	37123	Montgomery	27548	0	214.915	2	0
45	45017	Calhoun	14781	0	140.176	2	0
45	45023	Chester	32267	4	233.458	2	2
51	51033	Caroline	29984	0	387.296	2	0
51	51069	Frederick	83199	0	539.326	2	0
51	51159	Richmond	8908	0	359.524	2	0
51	51163	Rockbridge	22354	1	464.405	2	0.5
12	12047	Hamilton	14295	0	222.07	1	0
12	12123	Taylor	22493	2	282.279	1	2
13	13027	Brooks	15658	0	284.867	1	0
13	13123	Gilmer	29400	1	487.069	1	1
13	13131	Grady	25205	0	347.296	1	0
13	13159	Jasper	13635	1	347.231	1	1
13	13167	Johnson	9656	0	230.211	1	0
13	13221	Oglethorpe	14871	0	332.084	1	0
13	13303	Washington	20816	1	255.938	1	1
13	13319	Wilkinson	9155	0	277.978	1	0
13	13321	Worth	20699	1	308.868	1	1
37	37007	Anson	25759	2	189.376	1	2
37	37015	Bertie	20199	0	178.338	1	0
37	37113	Macon	34201	3	432.832	1	3
37	37121	Mitchell	15246	0	398.896	1	0
37	37149	Polk	20366	0	346.3	1	0
45	45037	Edgefield	26514	1	238.554	1	1
45	45053	Jasper	27824	14	84.7164	1	14
45	45061	Lee	17896	2	131.99	1	2
51	51007	Amelia	12903	0	345.251	1	0
51	51025	Brunswick	16698	0	286.837	1	0
51	51075	Goochland	22253	0	379.227	1	0
51	51079	Greene	19162	0	458.83	1	0
51	51193	Westmoreland	17629	1	379.414	1	1
51	51199	York	67837	1	281.089	1	1
12	12013	Calhoun	14462	0	437.151	0	#DIV/0!
12	12037	Franklin	11761	0	399.911	0	#DIV/0!
12	12043	Glades	13670	1	168.769	0	#DIV/0!
12	12065	Jefferson	14081	0	312.377	0	#DIV/0!
12	12067	Lafayette	8663	0	241.41	0	#DIV/0!
12	12075	Levy	39832	4	205.64	0	#DIV/0!
12	12077	Liberty	8331	0	406.266	0	#DIV/0!
12	12079	Madison	18408	0	271.665	0	#DIV/0!
13	13003	Atkinson	8398	0	216.537	0	#DIV/0!
13	13007	Baker	3180	0	365.42	0	#DIV/0!
13	13011	Banks	18495	0	392.471	0	#DIV/0!
13	13025	Brantley	18455	0	131.202	0	#DIV/0!
13	13037	Calhoun	6479	0	382.259	0	#DIV/0!
13	13061	Clay	3141	0	416.139	0	#DIV/0!
13	13079	Crawford	12388	0	344.689	0	#DIV/0!
13	13085	Dawson	23312	0	450.424	0	#DIV/0!
13	13101	Echols	4040	0	218.882	0	#DIV/0!
13	13111	Fannin	24303	0	486.371	0	#DIV/0!
13	13119	Franklin	22311	0	372.841	0	#DIV/0!
13	13125	Glascock	3065	0	256.539	0	#DIV/0!
13	13141	Hancock	8551	1	289.722	0	#DIV/0!
13	13145	Harris	33381	0	427.879	0	#DIV/0!
13	13149	Heard	11539	0	467.555	0	#DIV/0!
13	13181	Lincoln	7673	0	277.598	0	#DIV/0!
13	13183	Long	17731	0	112.007	0	#DIV/0!
13	13195	Madison	28441	0	356.589	0	#DIV/0!
13	13197	Marion	8761	0	382.603	0	#DIV/0!
13	13201	Miller	5854	0	393.307	0	#DIV/0!
13	13209	Montgomery	8951	0	196.1	0	#DIV/0!
13	13231	Pike	17941	0	395.055	0	#DIV/0!
13	13239	Quitman	2302	0	421.166	0	#DIV/0!
13	13241	Rabun	16281	2	415.694	0	#DIV/0!
13	13249	Schley	5168	0	361.276	0	#DIV/0!
13	13253	Seminole	8647	0	407.576	0	#DIV/0!
13	13259	Stewart	5851	0	406.312	0	#DIV/0!
13	13263	Talbot	6337	0	392.972	0	#DIV/0!
13	13265	Taliaferro	1639	0	297.614	0	#DIV/0!
13	13269	Taylor	8330	0	363.014	0	#DIV/0!
13	13281	Towns	11182	0	443.883	0	#DIV/0!
13	13289	Twiggs	8390	0	293.827	0	#DIV/0!
13	13291	Union	22267	0	458.971	0	#DIV/0!
13	13301	Warren	5460	0	272.404	0	#DIV/0!
13	13307	Webster	2648	0	379.187	0	#DIV/0!
13	13309	Wheeler	7903	0	211.461	0	#DIV/0!
13	13315	Wilcox	8857	0	273.416	0	#DIV/0!
37	37005	Alleghany	10837	0	381.151	0	#DIV/0!
37	37011	Avery	17689	0	388.566	0	#DIV/0!
37	37029	Camden	10309	0	180.754	0	#DIV/0!
37	37033	Caswell	22941	0	309.268	0	#DIV/0!
37	37039	Cherokee	27178	0	481.875	0	#DIV/0!
37	37043	Clay	10703	0	452.971	0	#DIV/0!
37	37053	Currituck	25263	3	176.963	0	#DIV/0!
37	37073	Gates	11431	0	203.358	0	#DIV/0!
37	37075	Graham	8616	0	476.296	0	#DIV/0!
37	37079	Greene	21134	0	162.736	0	#DIV/0!
37	37095	Hyde	5526	0	92.8301	0	#DIV/0!
37	37103	Jones	10013	0	103.964	0	#DIV/0!
37	37137	Pamlico	12781	1	81.338	0	#DIV/0!
37	37143	Perquimans	13440	0	169.396	0	#DIV/0!
37	37173	Swain	14434	0	458.033	0	#DIV/0!
37	37177	Tyrrell	4070	0	121.601	0	#DIV/0!
37	37185	Warren	20155	1	266.959	0	#DIV/0!
37	37199	Yancey	17587	0	399.646	0	#DIV/0!
45	45011	Barnwell	21725	5	166.649	0	#DIV/0!
45	45065	McCormick	9706	0	272.956	0	#DIV/0!
51	51011	Appomattox	15414	0	391.341	0	#DIV/0!
51	51017	Bath	4470	0	497.399	0	#DIV/0!
51	51021	Bland	6561	0	442.935	0	#DIV/0!
51	51027	Buchanan	22776	0	497.482	0	#DIV/0!
51	51029	Buckingham	17032	0	394.398	0	#DIV/0!
51	51035	Carroll	29724	0	387.067	0	#DIV/0!
51	51036	Charles City	7040	0	308.936	0	#DIV/0!
51	51037	Charlotte	12201	0	351.331	0	#DIV/0!
51	51045	Craig	5211	0	446.827	0	#DIV/0!
51	51049	Cumberland	9719	0	374.707	0	#DIV/0!
51	51051	Dickenson	15115	0	501.797	0	#DIV/0!
51	51053	Dinwiddie	27852	0	304.709	0	#DIV/0!
51	51063	Floyd	15651	0	393.917	0	#DIV/0!
51	51077	Grayson	16012	0	401.33	0	#DIV/0!
51	51081	Greensville	11885	0	263.668	0	#DIV/0!
51	51091	Highland	2214	0	519.165	0	#DIV/0!
51	51095	James City	73147	0	296.498	0	#DIV/0!
51	51097	King and Queen	7158	0	340.867	0	#DIV/0!
51	51103	Lancaster	10965	0	330.199	0	#DIV/0!
51	51105	Lee	24742	0	514.501	0	#DIV/0!
51	51109	Louisa	34602	0	406.083	0	#DIV/0!
51	51111	Lunenburg	12299	0	323.101	0	#DIV/0!
51	51113	Madison	13134	0	461.844	0	#DIV/0!
51	51115	Mathews	8862	0	295.625	0	#DIV/0!
51	51119	Middlesex	10606	0	322.122	0	#DIV/0!
51	51125	Nelson	14785	0	432.192	0	#DIV/0!
51	51127	New Kent	20392	0	321.98	0	#DIV/0!
51	51131	Northampton	12155	0	274.613	0	#DIV/0!
51	51133	Northumberland	12232	0	345.684	0	#DIV/0!
51	51141	Patrick	18045	0	365.234	0	#DIV/0!
51	51145	Powhatan	28031	0	362.744	0	#DIV/0!
51	51157	Rappahannock	7378	0	483.481	0	#DIV/0!
51	51175	Southampton	18109	1	247.04	0	#DIV/0!
51	51181	Surry	6709	0	278.045	0	#DIV/0!
51	51183	Sussex	11715	0	273.356	0	#DIV/0!
51	51520	Bristol	17141	0	447.446	0	#DIV/0!
