# Supplementary material for: Leveraging Twitter to gauge evacuation compliance: Spatiotemporal analysis of Hurricane Matthew
Source: PLoS One. 2017 Jul 28;12(7):e0181701. doi: 10.1371/journal.pone.0181701 (PMC5533310; doi:10.1371/journal.pone.0181701)
Supplement: S3 File — (XLSX) [file pone.0181701.s003.xlsx]

## Sheet: ALL
Time	Tweets hourly	Tweets daily
0	39	592
1	11	592
2	13	592
3	7	592
4	1	592
5	3	592
6	7	592
7	25	592
8	25	592
9	16	592
10	32	592
11	27	592
12	29	592
13	32	592
14	25	592
15	12	592
16	24	592
17	36	592
18	35	592
19	54	592
20	47	592
21	36	592
22	31	592
23	25	592
0	9	1467
1	4	1467
2	5	1467
3	6	1467
4	8	1467
5	17	1467
6	20	1467
7	23	1467
8	37	1467
9	39	1467
10	60	1467
11	30	1467
12	37	1467
13	25	1467
14	50	1467
15	70	1467
16	80	1467
17	135	1467
18	142	1467
19	141	1467
20	141	1467
21	121	1467
22	117	1467
23	150	1467
0	76	6874
1	39	6874
2	19	6874
3	9	6874
4	21	6874
5	56	6874
6	90	6874
7	139	6874
8	206	6874
9	232	6874
10	268	6874
11	345	6874
12	293	6874
13	303	6874
14	320	6874
15	491	6874
16	582	6874
17	582	6874
18	656	6874
19	606	6874
20	521	6874
21	336	6874
22	320	6874
23	364	6874
0	213	11566
1	108	11566
2	52	11566
3	20	11566
4	36	11566
5	92	11566
6	174	11566
7	278	11566
8	405	11566
9	581	11566
10	680	11566
11	794	11566
12	747	11566
13	784	11566
14	698	11566
15	708	11566
16	697	11566
17	713	11566
18	751	11566
19	759	11566
20	736	11566
21	569	11566
22	513	11566
23	458	11566
0	289	18833
1	163	18833
2	85	18833
3	48	18833
4	62	18833
5	123	18833
6	226	18833
7	360	18833
8	677	18833
9	897	18833
10	1099	18833
11	1195	18833
12	1364	18833
13	1279	18833
14	1243	18833
15	1193	18833
16	1199	18833
17	1186	18833
18	1281	18833
19	1307	18833
20	1087	18833
21	959	18833
22	809	18833
23	702	18833
0	474	11307
1	323	11307
2	193	11307
3	137	11307
4	119	11307
5	197	11307
6	252	11307
7	405	11307
8	603	11307
9	770	11307
10	808	11307
11	938	11307
12	728	11307
13	676	11307
14	613	11307
15	592	11307
16	553	11307
17	558	11307
18	498	11307
19	552	11307
20	387	11307
21	349	11307
22	325	11307
23	257	11307
0	180	7528
1	164	7528
2	105	7528
3	71	7528
4	64	7528
5	77	7528
6	110	7528
7	194	7528
8	309	7528
9	428	7528
10	507	7528
11	503	7528
12	487	7528
13	500	7528
14	531	7528
15	465	7528
16	438	7528
17	406	7528
18	405	7528
19	405	7528
20	335	7528
21	343	7528
22	277	7528
23	224	7528
0	198	3094
1	90	3094
2	48	3094
3	28	3094
4	18	3094
5	45	3094
6	47	3094
7	80	3094
8	152	3094
9	175	3094
10	227	3094
11	285	3094
12	216	3094
13	209	3094
14	176	3094
15	165	3094
16	156	3094
17	190	3094
18	177	3094
19	133	3094
20	127	3094
21	34	3094
22	60	3094
23	58	3094
0	43	1752
1	24	1752
2	16	1752
3	9	1752
4	12	1752
5	19	1752
6	35	1752
7	46	1752
8	71	1752
9	103	1752
10	125	1752
11	123	1752
12	120	1752
13	108	1752
14	123	1752
15	96	1752
16	114	1752
17	105	1752
18	103	1752
19	94	1752
20	84	1752
21	86	1752
22	55	1752
23	38	1752
0	23	1176
1	13	1176
2	14	1176
3	2	1176
4	7	1176
5	12	1176
6	19	1176
7	36	1176
8	55	1176
9	89	1176
10	77	1176
11	85	1176
12	91	1176
13	71	1176
14	62	1176
15	73	1176
16	81	1176
17	64	1176
18	51	1176
19	62	1176
20	62	1176
21	39	1176
22	48	1176
23	40	1176
Total	64189

## Sheet: FL1
Time	Tweets hourly	Tweets daily
FLORIDA	38302
0	16	310
1	5	310
2	6	310
3	3	310
4	0	310
5	3	310
6	5	310
7	16	310
8	12	310
9	8	310
10	16	310
11	13	310
12	15	310
13	15	310
14	18	310
15	8	310
16	17	310
17	20	310
18	13	310
19	33	310
20	19	310
21	17	310
22	17	310
23	15	310
0	5	944
1	4	944
2	4	944
3	3	944
4	5	944
5	12	944
6	12	944
7	12	944
8	26	944
9	19	944
10	27	944
11	20	944
12	19	944
13	11	944
14	21	944
15	38	944
16	46	944
17	93	944
18	108	944
19	95	944
20	95	944
21	82	944
22	80	944
23	107	944
0	51	3917
1	25	3917
2	12	3917
3	7	3917
4	11	3917
5	31	3917
6	59	3917
7	88	3917
8	146	3917
9	154	3917
10	180	3917
11	232	3917
12	192	3917
13	204	3917
14	186	3917
15	179	3917
16	220	3917
17	282	3917
18	345	3917
19	366	3917
20	310	3917
21	204	3917
22	190	3917
23	243	3917
0	147	8636
1	63	8636
2	33	8636
3	13	8636
4	22	8636
5	51	8636
6	124	8636
7	189	8636
8	276	8636
9	405	8636
10	475	8636
11	599	8636
12	561	8636
13	590	8636
14	525	8636
15	524	8636
16	534	8636
17	541	8636
18	585	8636
19	590	8636
20	589	8636
21	455	8636
22	385	8636
23	360	8636
0	214	14028
1	120	14028
2	67	14028
3	36	14028
4	47	14028
5	82	14028
6	161	14028
7	254	14028
8	509	14028
9	631	14028
10	789	14028
11	895	14028
12	1075	14028
13	970	14028
14	956	14028
15	935	14028
16	907	14028
17	898	14028
18	960	14028
19	967	14028
20	805	14028
21	675	14028
22	576	14028
23	499	14028
0	322	6781
1	237	6781
2	154	6781
3	111	6781
4	77	6781
5	131	6781
6	153	6781
7	259	6781
8	392	6781
9	565	6781
10	543	6781
11	555	6781
12	462	6781
13	420	6781
14	354	6781
15	351	6781
16	279	6781
17	297	6781
18	248	6781
19	310	6781
20	186	6781
21	152	6781
22	119	6781
23	104	6781
0	65	2022
1	38	2022
2	33	2022
3	16	2022
4	15	2022
5	24	2022
6	30	2022
7	60	2022
8	125	2022
9	140	2022
10	119	2022
11	141	2022
12	118	2022
13	157	2022
14	146	2022
15	137	2022
16	82	2022
17	89	2022
18	95	2022
19	88	2022
20	79	2022
21	100	2022
22	69	2022
23	56	2022
0	80	780
1	29	780
2	10	780
3	4	780
4	4	780
5	13	780
6	6	780
7	19	780
8	39	780
9	35	780
10	57	780
11	77	780
12	37	780
13	46	780
14	43	780
15	44	780
16	40	780
17	44	780
18	57	780
19	30	780
20	27	780
21	7	780
22	18	780
23	14	780
0	15	546
1	10	546
2	5	546
3	2	546
4	5	546
5	9	546
6	13	546
7	18	546
8	26	546
9	36	546
10	42	546
11	42	546
12	40	546
13	18	546
14	32	546
15	21	546
16	26	546
17	46	546
18	41	546
19	28	546
20	30	546
21	17	546
22	14	546
23	10	546
0	9	338
1	2	338
2	5	338
3	0	338
4	3	338
5	8	338
6	4	338
7	8	338
8	14	338
9	29	338
10	23	338
11	21	338
12	30	338
13	25	338
14	21	338
15	16	338
16	22	338
17	21	338
18	18	338
19	8	338
20	18	338
21	10	338
22	14	338
23	9	338
Total general	38302

## Sheet: GA1
Time	Tweets hourly	Tweets daily
GEORGIA	6555
0	8	74
1	3	74
2	1	74
3	0	74
4	1	74
5	0	74
6	0	74
7	5	74
8	5	74
9	3	74
10	8	74
11	2	74
12	4	74
13	3	74
14	0	74
15	0	74
16	1	74
17	6	74
18	4	74
19	3	74
20	13	74
21	1	74
22	2	74
23	1	74
0	1	109
1	0	109
2	1	109
3	1	109
4	1	109
5	0	109
6	1	109
7	3	109
8	3	109
9	5	109
10	7	109
11	2	109
12	4	109
13	2	109
14	6	109
15	7	109
16	8	109
17	9	109
18	7	109
19	7	109
20	9	109
21	7	109
22	11	109
23	7	109
0	7	471
1	3	471
2	2	471
3	1	471
4	1	471
5	7	471
6	10	471
7	14	471
8	16	471
9	15	471
10	14	471
11	12	471
12	14	471
13	20	471
14	17	471
15	32	471
16	35	471
17	39	471
18	47	471
19	49	471
20	38	471
21	19	471
22	26	471
23	33	471
0	10	809
1	13	809
2	2	809
3	0	809
4	0	809
5	6	809
6	10	809
7	20	809
8	28	809
9	44	809
10	51	809
11	49	809
12	69	809
13	59	809
14	42	809
15	53	809
16	47	809
17	48	809
18	42	809
19	62	809
20	44	809
21	34	809
22	34	809
23	42	809
0	28	1933
1	10	1933
2	6	1933
3	3	1933
4	4	1933
5	16	1933
6	29	1933
7	29	1933
8	72	1933
9	102	1933
10	157	1933
11	142	1933
12	122	1933
13	135	1933
14	111	1933
15	116	1933
16	110	1933
17	105	1933
18	98	1933
19	120	1933
20	123	1933
21	122	1933
22	86	1933
23	87	1933
0	58	1581
1	34	1581
2	12	1581
3	9	1581
4	13	1581
5	26	1581
6	27	1581
7	49	1581
8	72	1581
9	67	1581
10	80	1581
11	115	1581
12	83	1581
13	85	1581
14	96	1581
15	99	1581
16	89	1581
17	108	1581
18	72	1581
19	104	1581
20	79	1581
21	74	1581
22	71	1581
23	59	1581
0	42	799
1	49	799
2	19	799
3	19	799
4	15	799
5	13	799
6	13	799
7	25	799
8	30	799
9	34	799
10	56	799
11	60	799
12	50	799
13	49	799
14	52	799
15	36	799
16	34	799
17	29	799
18	34	799
19	31	799
20	27	799
21	29	799
22	29	799
23	24	799
0	13	351
1	5	351
2	5	351
3	3	351
4	0	351
5	2	351
6	7	351
7	10	351
8	8	351
9	19	351
10	28	351
11	23	351
12	22	351
13	27	351
14	21	351
15	24	351
16	16	351
17	33	351
18	18	351
19	19	351
20	20	351
21	5	351
22	12	351
23	11	351
0	6	244
1	5	244
2	6	244
3	3	244
4	2	244
5	0	244
6	1	244
7	4	244
8	10	244
9	11	244
10	18	244
11	18	244
12	24	244
13	19	244
14	11	244
15	17	244
16	15	244
17	18	244
18	11	244
19	8	244
20	12	244
21	11	244
22	9	244
23	5	244
0	3	184
1	4	184
2	1	184
3	0	184
4	0	184
5	2	184
6	2	184
7	6	184
8	9	184
9	6	184
10	13	184
11	14	184
12	8	184
13	8	184
14	13	184
15	9	184
16	15	184
17	8	184
18	6	184
19	16	184
20	6	184
21	9	184
22	13	184
23	13	184
Total general	6555

## Sheet: SC1
Time	Tweets hourly	Tweets daily
SOUTH CAROLINA	7944
0	6	52
1	1	52
2	0	52
3	0	52
4	0	52
5	0	52
6	1	52
7	0	52
8	2	52
9	1	52
10	2	52
11	2	52
12	3	52
13	6	52
14	2	52
15	0	52
16	1	52
17	2	52
18	2	52
19	6	52
20	6	52
21	5	52
22	3	52
23	1	52
0	1	124
1	0	124
2	0	124
3	1	124
4	0	124
5	1	124
6	1	124
7	5	124
8	3	124
9	3	124
10	7	124
11	1	124
12	4	124
13	4	124
14	3	124
15	10	124
16	5	124
17	6	124
18	8	124
19	18	124
20	10	124
21	10	124
22	7	124
23	16	124
0	5	1545
1	3	1545
2	2	1545
3	0	1545
4	2	1545
5	5	1545
6	5	1545
7	10	1545
8	18	1545
9	28	1545
10	30	1545
11	40	1545
12	40	1545
13	45	1545
14	69	1545
15	214	1545
16	260	1545
17	187	1545
18	159	1545
19	136	1545
20	115	1545
21	63	1545
22	63	1545
23	46	1545
0	32	1117
1	20	1117
2	7	1117
3	4	1117
4	11	1117
5	9	1117
6	13	1117
7	33	1117
8	51	1117
9	84	1117
10	96	1117
11	88	1117
12	60	1117
13	70	1117
14	74	1117
15	79	1117
16	67	1117
17	63	1117
18	65	1117
19	45	1117
20	44	1117
21	34	1117
22	42	1117
23	26	1117
0	18	1227
1	15	1227
2	8	1227
3	3	1227
4	3	1227
5	11	1227
6	12	1227
7	27	1227
8	46	1227
9	83	1227
10	64	1227
11	74	1227
12	81	1227
13	70	1227
14	75	1227
15	60	1227
16	76	1227
17	84	1227
18	126	1227
19	80	1227
20	53	1227
21	63	1227
22	49	1227
23	46	1227
0	39	1340
1	23	1340
2	10	1340
3	5	1340
4	9	1340
5	14	1340
6	25	1340
7	37	1340
8	34	1340
9	49	1340
10	78	1340
11	125	1340
12	102	1340
13	82	1340
14	83	1340
15	61	1340
16	66	1340
17	82	1340
18	84	1340
19	76	1340
20	73	1340
21	59	1340
22	64	1340
23	60	1340
0	44	1535
1	41	1535
2	40	1535
3	22	1535
4	30	1535
5	27	1535
6	43	1535
7	61	1535
8	86	1535
9	115	1535
10	148	1535
11	111	1535
12	111	1535
13	82	1535
14	96	1535
15	67	1535
16	80	1535
17	68	1535
18	74	1535
19	61	1535
20	39	1535
21	38	1535
22	31	1535
23	20	1535
0	17	487
1	7	487
2	1	487
3	2	487
4	0	487
5	0	487
6	2	487
7	9	487
8	20	487
9	43	487
10	25	487
11	46	487
12	40	487
13	46	487
14	30	487
15	30	487
16	39	487
17	27	487
18	26	487
19	32	487
20	21	487
21	7	487
22	6	487
23	11	487
0	8	305
1	6	305
2	0	305
3	3	305
4	0	305
5	3	305
6	4	305
7	7	305
8	15	305
9	21	305
10	20	305
11	19	305
12	16	305
13	23	305
14	26	305
15	12	305
16	18	305
17	10	305
18	23	305
19	14	305
20	13	305
21	29	305
22	9	305
23	6	305
0	5	212
1	2	212
2	5	212
3	0	212
4	3	212
5	0	212
6	6	212
7	7	212
8	9	212
9	15	212
10	9	212
11	18	212
12	22	212
13	7	212
14	7	212
15	16	212
16	16	212
17	13	212
18	12	212
19	13	212
20	7	212
21	7	212
22	9	212
23	4	212
Total general	7944

## Sheet: NC1
Time	Tweets hourly	Tweets daily
NORTH CAROLINA	8263
0	5	91
1	2	91
2	5	91
3	2	91
4	0	91
5	0	91
6	0	91
7	2	91
8	6	91
9	4	91
10	2	91
11	4	91
12	4	91
13	6	91
14	4	91
15	1	91
16	4	91
17	7	91
18	8	91
19	7	91
20	2	91
21	7	91
22	3	91
23	6	91
0	1	191
1	0	191
2	0	191
3	1	191
4	1	191
5	2	191
6	2	191
7	2	191
8	3	191
9	5	191
10	15	191
11	4	191
12	4	191
13	6	191
14	15	191
15	11	191
16	17	191
17	21	191
18	14	191
19	15	191
20	11	191
21	15	191
22	13	191
23	13	191
0	11	607
1	6	607
2	2	607
3	1	607
4	4	607
5	7	607
6	9	607
7	12	607
8	16	607
9	24	607
10	29	607
11	35	607
12	34	607
13	19	607
14	30	607
15	43	607
16	41	607
17	46	607
18	64	607
19	38	607
20	42	607
21	32	607
22	29	607
23	33	607
0	16	712
1	11	712
2	7	712
3	3	712
4	1	712
5	22	712
6	19	712
7	24	712
8	34	712
9	36	712
10	41	712
11	36	712
12	40	712
13	48	712
14	44	712
15	42	712
16	30	712
17	42	712
18	42	712
19	44	712
20	38	712
21	34	712
22	37	712
23	21	712
0	20	1044
1	12	1044
2	3	1044
3	4	1044
4	4	1044
5	10	1044
6	14	1044
7	33	1044
8	35	1044
9	51	1044
10	54	1044
11	53	1044
12	53	1044
13	60	1044
14	72	1044
15	49	1044
16	66	1044
17	65	1044
18	55	1044
19	96	1044
20	64	1044
21	55	1044
22	74	1044
23	42	1044
0	38	1138
1	18	1138
2	12	1138
3	7	1138
4	9	1138
5	15	1138
6	27	1138
7	28	1138
8	77	1138
9	56	1138
10	78	1138
11	103	1138
12	58	1138
13	64	1138
14	65	1138
15	62	1138
16	79	1138
17	54	1138
18	76	1138
19	52	1138
20	35	1138
21	55	1138
22	47	1138
23	23	1138
0	23	2581
1	28	2581
2	10	2581
3	12	2581
4	2	2581
5	12	2581
6	22	2581
7	38	2581
8	61	2581
9	124	2581
10	151	2581
11	176	2581
12	197	2581
13	196	2581
14	209	2581
15	187	2581
16	210	2581
17	183	2581
18	170	2581
19	169	2581
20	133	2581
21	105	2581
22	82	2581
23	81	2581
0	48	1025
1	27	1025
2	24	1025
3	10	1025
4	11	1025
5	17	1025
6	23	1025
7	29	1025
8	53	1025
9	58	1025
10	85	1025
11	93	1025
12	80	1025
13	62	1025
14	64	1025
15	42	1025
16	43	1025
17	65	1025
18	56	1025
19	43	1025
20	45	1025
21	11	1025
22	18	1025
23	18	1025
0	7	515
1	1	515
2	3	515
3	0	515
4	4	515
5	4	515
6	7	515
7	9	515
8	17	515
9	30	515
10	29	515
11	38	515
12	31	515
13	38	515
14	45	515
15	35	515
16	53	515
17	30	515
18	22	515
19	34	515
20	18	515
21	24	515
22	21	515
23	15	515
0	6	359
1	4	359
2	2	359
3	2	359
4	1	359
5	2	359
6	5	359
7	11	359
8	18	359
9	36	359
10	28	359
11	27	359
12	27	359
13	24	359
14	19	359
15	27	359
16	22	359
17	20	359
18	11	359
19	22	359
20	19	359
21	10	359
22	7	359
23	9	359
Total general	8263

## Sheet: VA1
Time	Tweets hourly	Tweets daily
VIRGINIA	3125
0	4	65
1	0	65
2	1	65
3	2	65
4	0	65
5	0	65
6	1	65
7	2	65
8	0	65
9	0	65
10	4	65
11	6	65
12	3	65
13	2	65
14	1	65
15	3	65
16	1	65
17	1	65
18	8	65
19	5	65
20	7	65
21	6	65
22	6	65
23	2	65
0	1	99
1	0	99
2	0	99
3	0	99
4	1	99
5	2	99
6	4	99
7	1	99
8	2	99
9	7	99
10	4	99
11	3	99
12	6	99
13	2	99
14	5	99
15	4	99
16	4	99
17	6	99
18	5	99
19	6	99
20	16	99
21	7	99
22	6	99
23	7	99
0	2	334
1	2	334
2	1	334
3	0	334
4	3	334
5	6	334
6	7	334
7	15	334
8	10	334
9	11	334
10	15	334
11	26	334
12	13	334
13	15	334
14	18	334
15	23	334
16	26	334
17	28	334
18	41	334
19	17	334
20	16	334
21	18	334
22	12	334
23	9	334
0	8	292
1	1	292
2	3	292
3	0	292
4	2	292
5	4	292
6	8	292
7	12	292
8	16	292
9	12	292
10	17	292
11	22	292
12	17	292
13	17	292
14	13	292
15	10	292
16	19	292
17	19	292
18	17	292
19	18	292
20	21	292
21	12	292
22	15	292
23	9	292
0	9	601
1	6	601
2	1	601
3	2	601
4	4	601
5	4	601
6	10	601
7	17	601
8	15	601
9	30	601
10	35	601
11	31	601
12	33	601
13	44	601
14	29	601
15	33	601
16	40	601
17	34	601
18	42	601
19	44	601
20	42	601
21	44	601
22	24	601
23	28	601
0	17	467
1	11	467
2	5	467
3	5	467
4	11	467
5	11	467
6	20	467
7	32	467
8	28	467
9	33	467
10	29	467
11	40	467
12	23	467
13	25	467
14	15	467
15	19	467
16	40	467
17	17	467
18	18	467
19	10	467
20	14	467
21	9	467
22	24	467
23	11	467
0	6	591
1	8	591
2	3	591
3	2	591
4	2	591
5	1	591
6	2	591
7	10	591
8	7	591
9	15	591
10	33	591
11	15	591
12	11	591
13	16	591
14	28	591
15	38	591
16	32	591
17	37	591
18	32	591
19	56	591
20	57	591
21	71	591
22	66	591
23	43	591
0	40	451
1	22	451
2	8	451
3	9	451
4	3	451
5	13	451
6	9	451
7	13	451
8	32	451
9	20	451
10	32	451
11	46	451
12	37	451
13	28	451
14	18	451
15	25	451
16	18	451
17	21	451
18	20	451
19	9	451
20	14	451
21	4	451
22	6	451
23	4	451
0	7	142
1	2	142
2	2	142
3	1	142
4	1	142
5	3	142
6	10	142
7	8	142
8	3	142
9	5	142
10	16	142
11	6	142
12	9	142
13	10	142
14	9	142
15	11	142
16	2	142
17	1	142
18	6	142
19	10	142
20	11	142
21	5	142
22	2	142
23	2	142
0	0	83
1	1	83
2	1	83
3	0	83
4	0	83
5	0	83
6	2	83
7	4	83
8	5	83
9	3	83
10	4	83
11	5	83
12	4	83
13	7	83
14	2	83
15	5	83
16	6	83
17	2	83
18	4	83
19	3	83
20	12	83
21	3	83
22	5	83
23	5	83
Total general	3125
