# Supplementary material for: Leveraging Twitter to gauge evacuation compliance: Spatiotemporal analysis of Hurricane Matthew
Source: PLoS One. 2017 Jul 28;12(7):e0181701. doi: 10.1371/journal.pone.0181701 (PMC5533310; doi:10.1371/journal.pone.0181701)
Supplement: S4 File — (XLSX) [file pone.0181701.s004.xlsx]

## Sheet: states_counties
month_post	day_postda	hour_postd	STATE	COUNTY
10	2	0	FLORIDA	Broward
10	2	0	SOUTH CAROLINA	Calhoun
10	2	0	NORTH CAROLINA	Cumberland
10	2	0	GEORGIA	Wilkinson
10	2	0	NORTH CAROLINA	Orange
10	2	0	FLORIDA	St. Lucie
10	2	0	VIRGINIA	Chesapeake
10	2	0	FLORIDA	Pinellas
10	2	0	FLORIDA	Alachua
10	2	0	FLORIDA	Pasco
10	2	0	FLORIDA	Leon
10	2	0	VIRGINIA	Rockbridge
10	2	0	VIRGINIA	Rockbridge
10	2	0	SOUTH CAROLINA	Charleston
10	2	0	NORTH CAROLINA	Orange
10	2	0	VIRGINIA	Poquoson
10	2	0	GEORGIA	Wilkinson
10	2	0	FLORIDA	Palm Beach
10	2	0	GEORGIA	Clarke
10	2	0	NORTH CAROLINA	Gaston
10	2	0	FLORIDA	St. Johns
10	2	0	GEORGIA	Wilkinson
10	2	0	FLORIDA	Palm Beach
10	2	0	FLORIDA	Broward
10	2	0	SOUTH CAROLINA	Pickens
10	2	0	NORTH CAROLINA	Richmond
10	2	0	FLORIDA	Miami-Dade
10	2	0	SOUTH CAROLINA	Greenville
10	2	0	FLORIDA	Broward
10	2	0	GEORGIA	Clarke
10	2	0	GEORGIA	Fulton
10	2	0	GEORGIA	Wilkinson
10	2	0	SOUTH CAROLINA	Calhoun
10	2	0	FLORIDA	Palm Beach
10	2	0	GEORGIA	Fulton
10	2	0	SOUTH CAROLINA	Charleston
10	2	0	FLORIDA	Okeechobee
10	2	0	FLORIDA	Brevard
10	2	0	FLORIDA	Orange
10	2	1	GEORGIA	Fulton
10	2	1	FLORIDA	Broward
10	2	1	FLORIDA	Miami-Dade
10	2	1	GEORGIA	Wilkinson
10	2	1	GEORGIA	Fulton
10	2	1	SOUTH CAROLINA	Calhoun
10	2	1	FLORIDA	Hillsborough
10	2	1	FLORIDA	Broward
10	2	1	NORTH CAROLINA	Wake
10	2	1	NORTH CAROLINA	Wake
10	2	1	FLORIDA	Palm Beach
10	2	2	NORTH CAROLINA	Wake
10	2	2	FLORIDA	Seminole
10	2	2	NORTH CAROLINA	Wake
10	2	2	FLORIDA	Miami-Dade
10	2	2	NORTH CAROLINA	Wake
10	2	2	FLORIDA	Miami-Dade
10	2	2	FLORIDA	Miami-Dade
10	2	2	NORTH CAROLINA	Wake
10	2	2	VIRGINIA	Williamsburg
10	2	2	FLORIDA	Broward
10	2	2	GEORGIA	Bulloch
10	2	2	NORTH CAROLINA	Wake
10	2	2	FLORIDA	Broward
10	2	3	FLORIDA	Monroe
10	2	3	NORTH CAROLINA	Wake
10	2	3	VIRGINIA	Fairfax
10	2	3	VIRGINIA	Fairfax
10	2	3	NORTH CAROLINA	Wake
10	2	3	FLORIDA	Polk
10	2	3	FLORIDA	Miami-Dade
10	2	4	GEORGIA	DeKalb
10	2	5	FLORIDA	Orange
10	2	5	FLORIDA	Duval
10	2	5	FLORIDA	Broward
10	2	6	SOUTH CAROLINA	Horry
10	2	6	FLORIDA	Orange
10	2	6	VIRGINIA	Suffolk
10	2	6	FLORIDA	Miami-Dade
10	2	6	FLORIDA	Duval
10	2	6	FLORIDA	Duval
10	2	6	FLORIDA	Miami-Dade
10	2	7	GEORGIA	Cobb
10	2	7	GEORGIA	Cobb
10	2	7	NORTH CAROLINA	Mecklenburg
10	2	7	FLORIDA	Manatee
10	2	7	FLORIDA	Palm Beach
10	2	7	FLORIDA	Hillsborough
10	2	7	FLORIDA	Hillsborough
10	2	7	FLORIDA	Palm Beach
10	2	7	FLORIDA	Brevard
10	2	7	VIRGINIA	Arlington
10	2	7	GEORGIA	Cobb
10	2	7	FLORIDA	Orange
10	2	7	FLORIDA	Broward
10	2	7	VIRGINIA	Arlington
10	2	7	FLORIDA	St. Lucie
10	2	7	NORTH CAROLINA	Richmond
10	2	7	FLORIDA	Broward
10	2	7	GEORGIA	Cobb
10	2	7	FLORIDA	Broward
10	2	7	GEORGIA	Cobb
10	2	7	FLORIDA	Clay
10	2	7	FLORIDA	Orange
10	2	7	FLORIDA	Seminole
10	2	7	FLORIDA	Duval
10	2	7	FLORIDA	Duval
10	2	8	FLORIDA	Volusia
10	2	8	FLORIDA	Orange
10	2	8	FLORIDA	Leon
10	2	8	NORTH CAROLINA	Wake
10	2	8	NORTH CAROLINA	Wake
10	2	8	FLORIDA	Duval
10	2	8	FLORIDA	Broward
10	2	8	SOUTH CAROLINA	Charleston
10	2	8	NORTH CAROLINA	Richmond
10	2	8	FLORIDA	Broward
10	2	8	FLORIDA	Broward
10	2	8	NORTH CAROLINA	Richmond
10	2	8	GEORGIA	DeKalb
10	2	8	GEORGIA	Fulton
10	2	8	GEORGIA	Fulton
10	2	8	GEORGIA	Fulton
10	2	8	GEORGIA	Fulton
10	2	8	FLORIDA	Broward
10	2	8	SOUTH CAROLINA	Calhoun
10	2	8	NORTH CAROLINA	Wake
10	2	8	FLORIDA	Palm Beach
10	2	8	NORTH CAROLINA	Guilford
10	2	8	FLORIDA	Miami-Dade
10	2	8	FLORIDA	Miami-Dade
10	2	8	FLORIDA	Palm Beach
10	2	9	GEORGIA	Fulton
10	2	9	FLORIDA	Duval
10	2	9	NORTH CAROLINA	Richmond
10	2	9	FLORIDA	Duval
10	2	9	NORTH CAROLINA	Wake
10	2	9	NORTH CAROLINA	Mecklenburg
10	2	9	GEORGIA	Cobb
10	2	9	FLORIDA	Palm Beach
10	2	9	FLORIDA	Seminole
10	2	9	FLORIDA	Palm Beach
10	2	9	NORTH CAROLINA	Richmond
10	2	9	FLORIDA	St. Johns
10	2	9	FLORIDA	Okaloosa
10	2	9	FLORIDA	Palm Beach
10	2	9	GEORGIA	Wilkinson
10	2	9	SOUTH CAROLINA	Horry
10	2	10	NORTH CAROLINA	Beaufort
10	2	10	SOUTH CAROLINA	Pickens
10	2	10	GEORGIA	Cobb
10	2	10	FLORIDA	Charlotte
10	2	10	GEORGIA	Cobb
10	2	10	FLORIDA	Alachua
10	2	10	NORTH CAROLINA	Richmond
10	2	10	GEORGIA	Fulton
10	2	10	FLORIDA	Miami-Dade
10	2	10	VIRGINIA	Hopewell
10	2	10	FLORIDA	Broward
10	2	10	GEORGIA	Cobb
10	2	10	FLORIDA	Miami-Dade
10	2	10	GEORGIA	Wilkinson
10	2	10	SOUTH CAROLINA	Charleston
10	2	10	FLORIDA	Duval
10	2	10	VIRGINIA	Loudoun
10	2	10	FLORIDA	Escambia
10	2	10	GEORGIA	Wilkinson
10	2	10	FLORIDA	Miami-Dade
10	2	10	FLORIDA	Miami-Dade
10	2	10	FLORIDA	Broward
10	2	10	GEORGIA	Wilkinson
10	2	10	FLORIDA	Broward
10	2	10	FLORIDA	Sumter
10	2	10	FLORIDA	Broward
10	2	10	FLORIDA	Palm Beach
10	2	10	GEORGIA	Fulton
10	2	10	FLORIDA	Hillsborough
10	2	10	VIRGINIA	Fairfax
10	2	10	VIRGINIA	Fairfax
10	2	10	FLORIDA	Miami-Dade
10	2	11	NORTH CAROLINA	Wake
10	2	11	VIRGINIA	Norfolk
10	2	11	FLORIDA	Seminole
10	2	11	FLORIDA	Hillsborough
10	2	11	FLORIDA	Miami-Dade
10	2	11	FLORIDA	Broward
10	2	11	GEORGIA	Wilkinson
10	2	11	FLORIDA	Polk
10	2	11	VIRGINIA	Rockbridge
10	2	11	VIRGINIA	Rockbridge
10	2	11	VIRGINIA	Fairfax
10	2	11	SOUTH CAROLINA	Georgetown
10	2	11	SOUTH CAROLINA	Greenville
10	2	11	NORTH CAROLINA	Durham
10	2	11	NORTH CAROLINA	Wake
10	2	11	NORTH CAROLINA	Wake
10	2	11	VIRGINIA	Loudoun
10	2	11	FLORIDA	Broward
10	2	11	FLORIDA	Miami-Dade
10	2	11	GEORGIA	Bibb
10	2	11	VIRGINIA	Fairfax
10	2	11	FLORIDA	Broward
10	2	11	FLORIDA	Escambia
10	2	11	FLORIDA	Escambia
10	2	11	FLORIDA	Broward
10	2	11	FLORIDA	Broward
10	2	11	FLORIDA	Broward
10	2	12	VIRGINIA	Virginia Beach
10	2	12	FLORIDA	Pinellas
10	2	12	FLORIDA	Miami-Dade
10	2	12	FLORIDA	Volusia
10	2	12	SOUTH CAROLINA	Calhoun
10	2	12	FLORIDA	Miami-Dade
10	2	12	SOUTH CAROLINA	Richland
10	2	12	GEORGIA	Fulton
10	2	12	NORTH CAROLINA	Richmond
10	2	12	GEORGIA	Fulton
10	2	12	FLORIDA	Lake
10	2	12	NORTH CAROLINA	Richmond
10	2	12	FLORIDA	Leon
10	2	12	GEORGIA	Cobb
10	2	12	FLORIDA	Palm Beach
10	2	12	FLORIDA	Miami-Dade
10	2	12	VIRGINIA	Rockbridge
10	2	12	SOUTH CAROLINA	Newberry
10	2	12	FLORIDA	Broward
10	2	12	GEORGIA	Fulton
10	2	12	FLORIDA	Orange
10	2	12	NORTH CAROLINA	Guilford
10	2	12	VIRGINIA	Loudoun
10	2	12	FLORIDA	Miami-Dade
10	2	12	FLORIDA	Miami-Dade
10	2	12	FLORIDA	St. Lucie
10	2	12	FLORIDA	Polk
10	2	12	FLORIDA	Broward
10	2	12	NORTH CAROLINA	Watauga
10	2	13	GEORGIA	Fulton
10	2	13	GEORGIA	Wilkinson
10	2	13	NORTH CAROLINA	Richmond
10	2	13	FLORIDA	Miami-Dade
10	2	13	SOUTH CAROLINA	Horry
10	2	13	FLORIDA	Orange
10	2	13	FLORIDA	Miami-Dade
10	2	13	FLORIDA	Leon
10	2	13	FLORIDA	Osceola
10	2	13	GEORGIA	Wilkinson
10	2	13	FLORIDA	Broward
10	2	13	FLORIDA	Miami-Dade
10	2	13	FLORIDA	Brevard
10	2	13	FLORIDA	Miami-Dade
10	2	13	FLORIDA	Miami-Dade
10	2	13	FLORIDA	Polk
10	2	13	NORTH CAROLINA	Richmond
10	2	13	SOUTH CAROLINA	Calhoun
10	2	13	SOUTH CAROLINA	Berkeley
10	2	13	VIRGINIA	Norfolk
10	2	13	VIRGINIA	Suffolk
10	2	13	SOUTH CAROLINA	Berkeley
10	2	13	NORTH CAROLINA	New Hanover
10	2	13	FLORIDA	Volusia
10	2	13	FLORIDA	Volusia
10	2	13	SOUTH CAROLINA	Calhoun
10	2	13	SOUTH CAROLINA	Lexington
10	2	13	FLORIDA	Polk
10	2	13	FLORIDA	Orange
10	2	13	NORTH CAROLINA	Mecklenburg
10	2	13	NORTH CAROLINA	Mecklenburg
10	2	13	NORTH CAROLINA	Mecklenburg
10	2	14	NORTH CAROLINA	Richmond
10	2	14	FLORIDA	Volusia
10	2	14	NORTH CAROLINA	Pitt
10	2	14	FLORIDA	Broward
10	2	14	FLORIDA	Orange
10	2	14	FLORIDA	Palm Beach
10	2	14	FLORIDA	Broward
10	2	14	VIRGINIA	Norfolk
10	2	14	FLORIDA	Miami-Dade
10	2	14	FLORIDA	Lee
10	2	14	FLORIDA	Brevard
10	2	14	FLORIDA	Broward
10	2	14	FLORIDA	Palm Beach
10	2	14	SOUTH CAROLINA	Charleston
10	2	14	FLORIDA	Orange
10	2	14	NORTH CAROLINA	Mecklenburg
10	2	14	FLORIDA	Volusia
10	2	14	FLORIDA	Miami-Dade
10	2	14	SOUTH CAROLINA	Calhoun
10	2	14	NORTH CAROLINA	Richmond
10	2	14	FLORIDA	Miami-Dade
10	2	14	FLORIDA	Palm Beach
10	2	14	FLORIDA	Lee
10	2	14	FLORIDA	Seminole
10	2	14	FLORIDA	Lee
10	2	15	FLORIDA	Palm Beach
10	2	15	FLORIDA	Orange
10	2	15	VIRGINIA	Rockbridge
10	2	15	VIRGINIA	Rockbridge
10	2	15	VIRGINIA	Roanoke
10	2	15	FLORIDA	Marion
10	2	15	FLORIDA	Osceola
10	2	15	FLORIDA	Broward
10	2	15	FLORIDA	Broward
10	2	15	FLORIDA	Brevard
10	2	15	FLORIDA	Hillsborough
10	2	15	NORTH CAROLINA	Richmond
10	2	16	FLORIDA	Palm Beach
10	2	16	FLORIDA	Miami-Dade
10	2	16	FLORIDA	Miami-Dade
10	2	16	FLORIDA	Hillsborough
10	2	16	NORTH CAROLINA	Mecklenburg
10	2	16	FLORIDA	Orange
10	2	16	FLORIDA	Charlotte
10	2	16	FLORIDA	Okaloosa
10	2	16	FLORIDA	Clay
10	2	16	FLORIDA	Miami-Dade
10	2	16	FLORIDA	Miami-Dade
10	2	16	FLORIDA	Martin
10	2	16	NORTH CAROLINA	Gaston
10	2	16	NORTH CAROLINA	Gaston
10	2	16	VIRGINIA	Fairfax
10	2	16	FLORIDA	Orange
10	2	16	FLORIDA	Okaloosa
10	2	16	FLORIDA	Broward
10	2	16	SOUTH CAROLINA	Calhoun
10	2	16	NORTH CAROLINA	Wake
10	2	16	FLORIDA	Broward
10	2	16	GEORGIA	Fulton
10	2	16	FLORIDA	Broward
10	2	16	FLORIDA	Lee
10	2	17	FLORIDA	Lee
10	2	17	NORTH CAROLINA	Richmond
10	2	17	FLORIDA	Hillsborough
10	2	17	FLORIDA	Miami-Dade
10	2	17	FLORIDA	Marion
10	2	17	FLORIDA	Miami-Dade
10	2	17	VIRGINIA	Lynchburg
10	2	17	GEORGIA	Gwinnett
10	2	17	FLORIDA	Lee
10	2	17	FLORIDA	Hernando
10	2	17	SOUTH CAROLINA	Charleston
10	2	17	NORTH CAROLINA	Richmond
10	2	17	FLORIDA	Orange
10	2	17	FLORIDA	Miami-Dade
10	2	17	FLORIDA	Broward
10	2	17	GEORGIA	Wilkinson
10	2	17	FLORIDA	Palm Beach
10	2	17	FLORIDA	Broward
10	2	17	NORTH CAROLINA	Richmond
10	2	17	FLORIDA	Broward
10	2	17	GEORGIA	Gwinnett
10	2	17	GEORGIA	Clayton
10	2	17	FLORIDA	Palm Beach
10	2	17	FLORIDA	Lee
10	2	17	NORTH CAROLINA	Richmond
10	2	17	FLORIDA	Duval
10	2	17	NORTH CAROLINA	Craven
10	2	17	FLORIDA	Escambia
10	2	17	GEORGIA	Fulton
10	2	17	FLORIDA	Palm Beach
10	2	17	SOUTH CAROLINA	York
10	2	17	GEORGIA	Bulloch
10	2	17	FLORIDA	Broward
10	2	17	NORTH CAROLINA	Mecklenburg
10	2	17	FLORIDA	Broward
10	2	17	NORTH CAROLINA	Wake
10	2	18	VIRGINIA	Radford
10	2	18	FLORIDA	Osceola
10	2	18	NORTH CAROLINA	Mecklenburg
10	2	18	FLORIDA	Hillsborough
10	2	18	NORTH CAROLINA	Wake
10	2	18	FLORIDA	Palm Beach
10	2	18	GEORGIA	Clarke
10	2	18	NORTH CAROLINA	Cabarrus
10	2	18	FLORIDA	Broward
10	2	18	SOUTH CAROLINA	Calhoun
10	2	18	NORTH CAROLINA	Caldwell
10	2	18	VIRGINIA	Rockbridge
10	2	18	NORTH CAROLINA	Wake
10	2	18	FLORIDA	Volusia
10	2	18	VIRGINIA	Fairfax
10	2	18	VIRGINIA	Rockbridge
10	2	18	FLORIDA	Orange
10	2	18	VIRGINIA	Harrisonburg
10	2	18	GEORGIA	Cobb
10	2	18	FLORIDA	Volusia
10	2	18	FLORIDA	Pinellas
10	2	18	NORTH CAROLINA	Wake
10	2	18	FLORIDA	St. Lucie
10	2	18	FLORIDA	St. Johns
10	2	18	FLORIDA	Clay
10	2	18	GEORGIA	Wilkinson
10	2	18	VIRGINIA	Fairfax
10	2	18	NORTH CAROLINA	Guilford
10	2	18	VIRGINIA	Rockbridge
10	2	18	VIRGINIA	Norfolk
10	2	18	FLORIDA	Volusia
10	2	18	GEORGIA	Wilkinson
10	2	18	NORTH CAROLINA	Durham
10	2	18	FLORIDA	Pinellas
10	2	18	SOUTH CAROLINA	Calhoun
10	2	19	FLORIDA	Hillsborough
10	2	19	VIRGINIA	Fairfax
10	2	19	FLORIDA	Palm Beach
10	2	19	FLORIDA	Pinellas
10	2	19	NORTH CAROLINA	Richmond
10	2	19	FLORIDA	Hillsborough
10	2	19	NORTH CAROLINA	Richmond
10	2	19	FLORIDA	Pinellas
10	2	19	FLORIDA	Pinellas
10	2	19	GEORGIA	Cobb
10	2	19	FLORIDA	Hillsborough
10	2	19	SOUTH CAROLINA	Calhoun
10	2	19	FLORIDA	Pinellas
10	2	19	FLORIDA	Leon
10	2	19	FLORIDA	Hillsborough
10	2	19	GEORGIA	Wilkinson
10	2	19	FLORIDA	Broward
10	2	19	VIRGINIA	Chesapeake
10	2	19	FLORIDA	Hillsborough
10	2	19	NORTH CAROLINA	Cumberland
10	2	19	FLORIDA	Hillsborough
10	2	19	NORTH CAROLINA	Richmond
10	2	19	NORTH CAROLINA	Pender
10	2	19	SOUTH CAROLINA	Aiken
10	2	19	FLORIDA	Pinellas
10	2	19	FLORIDA	Pasco
10	2	19	SOUTH CAROLINA	Pickens
10	2	19	FLORIDA	Hillsborough
10	2	19	FLORIDA	Broward
10	2	19	FLORIDA	Broward
10	2	19	FLORIDA	Miami-Dade
10	2	19	FLORIDA	Hillsborough
10	2	19	FLORIDA	Hillsborough
10	2	19	VIRGINIA	Orange
10	2	19	FLORIDA	Broward
10	2	19	FLORIDA	Miami-Dade
10	2	19	VIRGINIA	Chesapeake
10	2	19	FLORIDA	Palm Beach
10	2	19	FLORIDA	Orange
10	2	19	SOUTH CAROLINA	Calhoun
10	2	19	FLORIDA	Pinellas
10	2	19	SOUTH CAROLINA	Calhoun
10	2	19	FLORIDA	Polk
10	2	19	FLORIDA	Hillsborough
10	2	19	FLORIDA	Hillsborough
10	2	19	GEORGIA	Carroll
10	2	19	FLORIDA	Duval
10	2	19	NORTH CAROLINA	Wake
10	2	19	SOUTH CAROLINA	Horry
10	2	19	FLORIDA	Hillsborough
10	2	19	FLORIDA	Hillsborough
10	2	19	NORTH CAROLINA	Wake
10	2	19	FLORIDA	Pasco
10	2	19	VIRGINIA	Rockbridge
10	2	20	FLORIDA	Hillsborough
10	2	20	FLORIDA	Hillsborough
10	2	20	VIRGINIA	Virginia Beach
10	2	20	VIRGINIA	Virginia Beach
10	2	20	SOUTH CAROLINA	Pickens
10	2	20	FLORIDA	Hillsborough
10	2	20	VIRGINIA	Norfolk
10	2	20	VIRGINIA	Newport News
10	2	20	SOUTH CAROLINA	Lexington
10	2	20	FLORIDA	Okeechobee
10	2	20	FLORIDA	Marion
10	2	20	FLORIDA	Bay
10	2	20	FLORIDA	Lee
10	2	20	SOUTH CAROLINA	Calhoun
10	2	20	FLORIDA	St. Lucie
10	2	20	FLORIDA	Hillsborough
10	2	20	SOUTH CAROLINA	Darlington
10	2	20	FLORIDA	Alachua
10	2	20	FLORIDA	Pinellas
10	2	20	GEORGIA	Wilkinson
10	2	20	FLORIDA	Pinellas
10	2	20	GEORGIA	Wilkinson
10	2	20	GEORGIA	Wilkinson
10	2	20	VIRGINIA	Norfolk
10	2	20	FLORIDA	Hillsborough
10	2	20	FLORIDA	Pinellas
10	2	20	FLORIDA	Broward
10	2	20	FLORIDA	Miami-Dade
10	2	20	VIRGINIA	Fairfax
10	2	20	SOUTH CAROLINA	Spartanburg
10	2	20	GEORGIA	Wilkinson
10	2	20	FLORIDA	Osceola
10	2	20	GEORGIA	Wilkinson
10	2	20	GEORGIA	Wilkinson
10	2	20	SOUTH CAROLINA	Spartanburg
10	2	20	GEORGIA	Wilkinson
10	2	20	GEORGIA	Wilkinson
10	2	20	GEORGIA	Wilkinson
10	2	20	GEORGIA	Coweta
10	2	20	FLORIDA	Orange
10	2	20	GEORGIA	Wilkinson
10	2	20	GEORGIA	Wilkinson
10	2	20	FLORIDA	Orange
10	2	20	GEORGIA	Wilkinson
10	2	20	NORTH CAROLINA	Richmond
10	2	20	NORTH CAROLINA	Mecklenburg
10	2	20	VIRGINIA	Manassas
10	2	21	VIRGINIA	Rockbridge
10	2	21	FLORIDA	Hillsborough
10	2	21	SOUTH CAROLINA	Calhoun
10	2	21	VIRGINIA	Rockbridge
10	2	21	FLORIDA	St. Lucie
10	2	21	VIRGINIA	Fairfax
10	2	21	SOUTH CAROLINA	Charleston
10	2	21	NORTH CAROLINA	Wake
10	2	21	FLORIDA	Pinellas
10	2	21	FLORIDA	Miami-Dade
10	2	21	FLORIDA	Hillsborough
10	2	21	FLORIDA	Leon
10	2	21	NORTH CAROLINA	Richmond
10	2	21	FLORIDA	Miami-Dade
10	2	21	SOUTH CAROLINA	Calhoun
10	2	21	SOUTH CAROLINA	Lexington
10	2	21	NORTH CAROLINA	Richmond
10	2	21	FLORIDA	Pinellas
10	2	21	FLORIDA	Pasco
10	2	21	SOUTH CAROLINA	Calhoun
10	2	21	FLORIDA	St. Lucie
10	2	21	GEORGIA	Wilkinson
10	2	21	FLORIDA	Duval
10	2	21	NORTH CAROLINA	Franklin
10	2	21	FLORIDA	Manatee
10	2	21	NORTH CAROLINA	Richmond
10	2	21	FLORIDA	Miami-Dade
10	2	21	NORTH CAROLINA	Richmond
10	2	21	VIRGINIA	Fairfax
10	2	21	FLORIDA	Broward
10	2	21	FLORIDA	Volusia
10	2	21	NORTH CAROLINA	Guilford
10	2	21	VIRGINIA	Loudoun
10	2	21	FLORIDA	Collier
10	2	21	FLORIDA	Miami-Dade
10	2	21	VIRGINIA	Loudoun
10	2	22	SOUTH CAROLINA	Florence
10	2	22	FLORIDA	Palm Beach
10	2	22	VIRGINIA	Virginia Beach
10	2	22	NORTH CAROLINA	Richmond
10	2	22	FLORIDA	Broward
10	2	22	FLORIDA	Hillsborough
10	2	22	GEORGIA	Wilkinson
10	2	22	FLORIDA	Broward
10	2	22	FLORIDA	Volusia
10	2	22	FLORIDA	Miami-Dade
10	2	22	FLORIDA	Broward
10	2	22	SOUTH CAROLINA	Berkeley
10	2	22	FLORIDA	St. Lucie
10	2	22	FLORIDA	Hillsborough
10	2	22	NORTH CAROLINA	Wake
10	2	22	FLORIDA	Seminole
10	2	22	VIRGINIA	Isle of Wight
10	2	22	VIRGINIA	Rockbridge
10	2	22	FLORIDA	Miami-Dade
10	2	22	FLORIDA	Palm Beach
10	2	22	NORTH CAROLINA	Richmond
10	2	22	FLORIDA	Broward
10	2	22	GEORGIA	Wilkinson
10	2	22	FLORIDA	Duval
10	2	22	VIRGINIA	Hanover
10	2	22	VIRGINIA	Harrisonburg
10	2	22	FLORIDA	Broward
10	2	22	SOUTH CAROLINA	Calhoun
10	2	22	FLORIDA	Palm Beach
10	2	22	VIRGINIA	Prince William
10	2	22	FLORIDA	Broward
10	2	23	FLORIDA	Miami-Dade
10	2	23	FLORIDA	Miami-Dade
10	2	23	FLORIDA	Miami-Dade
10	2	23	NORTH CAROLINA	Durham
10	2	23	FLORIDA	Escambia
10	2	23	FLORIDA	Palm Beach
10	2	23	FLORIDA	Santa Rosa
10	2	23	SOUTH CAROLINA	Charleston
10	2	23	NORTH CAROLINA	Wake
10	2	23	NORTH CAROLINA	Union
10	2	23	FLORIDA	Broward
10	2	23	FLORIDA	Duval
10	2	23	FLORIDA	Lee
10	2	23	VIRGINIA	Norfolk
10	2	23	NORTH CAROLINA	Richmond
10	2	23	FLORIDA	Palm Beach
10	2	23	FLORIDA	Miami-Dade
10	2	23	NORTH CAROLINA	Richmond
10	2	23	FLORIDA	Miami-Dade
10	2	23	FLORIDA	Miami-Dade
10	2	23	GEORGIA	Wilkinson
10	2	23	FLORIDA	Collier
10	2	23	NORTH CAROLINA	Richmond
10	2	23	FLORIDA	Broward
10	2	23	VIRGINIA	Hampton
10	3	0	NORTH CAROLINA	Orange
10	3	0	FLORIDA	Miami-Dade
10	3	0	FLORIDA	Palm Beach
10	3	0	FLORIDA	Walton
10	3	0	SOUTH CAROLINA	Calhoun
10	3	0	GEORGIA	Houston
10	3	0	FLORIDA	Lake
10	3	0	FLORIDA	Duval
10	3	0	VIRGINIA	Fairfax
10	3	1	FLORIDA	Palm Beach
10	3	1	FLORIDA	Brevard
10	3	1	FLORIDA	Broward
10	3	1	FLORIDA	Brevard
10	3	2	GEORGIA	Fulton
10	3	2	FLORIDA	Miami-Dade
10	3	2	FLORIDA	Miami-Dade
10	3	2	FLORIDA	Miami-Dade
10	3	2	FLORIDA	Brevard
10	3	3	GEORGIA	Fulton
10	3	3	NORTH CAROLINA	Richmond
10	3	3	FLORIDA	Volusia
10	3	3	FLORIDA	Volusia
10	3	3	SOUTH CAROLINA	Spartanburg
10	3	3	FLORIDA	Palm Beach
10	3	4	FLORIDA	Miami-Dade
10	3	4	FLORIDA	Miami-Dade
10	3	4	FLORIDA	Miami-Dade
10	3	4	VIRGINIA	Loudoun
10	3	4	NORTH CAROLINA	Richmond
10	3	4	GEORGIA	Wilkinson
10	3	4	FLORIDA	Broward
10	3	4	FLORIDA	Miami-Dade
10	3	5	VIRGINIA	Loudoun
10	3	5	SOUTH CAROLINA	Greenville
10	3	5	FLORIDA	Duval
10	3	5	FLORIDA	Duval
10	3	5	VIRGINIA	Rockbridge
10	3	5	NORTH CAROLINA	Buncombe
10	3	5	FLORIDA	Miami-Dade
10	3	5	FLORIDA	Duval
10	3	5	NORTH CAROLINA	Mecklenburg
10	3	5	FLORIDA	Duval
10	3	5	FLORIDA	Orange
10	3	5	FLORIDA	Orange
10	3	5	FLORIDA	Palm Beach
10	3	5	FLORIDA	Polk
10	3	5	FLORIDA	Polk
10	3	5	FLORIDA	Miami-Dade
10	3	5	FLORIDA	Duval
10	3	6	VIRGINIA	Arlington
10	3	6	NORTH CAROLINA	Durham
10	3	6	FLORIDA	Broward
10	3	6	FLORIDA	Hillsborough
10	3	6	SOUTH CAROLINA	York
10	3	6	VIRGINIA	Chesterfield
10	3	6	FLORIDA	Leon
10	3	6	FLORIDA	Duval
10	3	6	FLORIDA	Duval
10	3	6	FLORIDA	Duval
10	3	6	VIRGINIA	Newport News
10	3	6	NORTH CAROLINA	Mecklenburg
10	3	6	VIRGINIA	Warren
10	3	6	FLORIDA	Broward
10	3	6	GEORGIA	Cobb
10	3	6	FLORIDA	Broward
10	3	6	FLORIDA	Palm Beach
10	3	6	FLORIDA	Palm Beach
10	3	6	FLORIDA	Palm Beach
10	3	6	FLORIDA	Manatee
10	3	7	GEORGIA	Wilkinson
10	3	7	FLORIDA	Broward
10	3	7	VIRGINIA	Rockbridge
10	3	7	NORTH CAROLINA	Wake
10	3	7	GEORGIA	Fulton
10	3	7	FLORIDA	Duval
10	3	7	GEORGIA	Ware
10	3	7	FLORIDA	Orange
10	3	7	FLORIDA	Polk
10	3	7	FLORIDA	Miami-Dade
10	3	7	FLORIDA	Pinellas
10	3	7	FLORIDA	Orange
10	3	7	FLORIDA	Duval
10	3	7	FLORIDA	Brevard
10	3	7	FLORIDA	Volusia
10	3	7	NORTH CAROLINA	Richmond
10	3	7	SOUTH CAROLINA	Aiken
10	3	7	FLORIDA	Duval
10	3	7	FLORIDA	Palm Beach
10	3	7	SOUTH CAROLINA	Calhoun
10	3	7	SOUTH CAROLINA	Calhoun
10	3	7	SOUTH CAROLINA	Calhoun
10	3	7	SOUTH CAROLINA	Horry
10	3	8	FLORIDA	Lee
10	3	8	FLORIDA	Bay
10	3	8	NORTH CAROLINA	Richmond
10	3	8	FLORIDA	Miami-Dade
10	3	8	FLORIDA	Monroe
10	3	8	FLORIDA	Miami-Dade
10	3	8	NORTH CAROLINA	Mecklenburg
10	3	8	FLORIDA	Hillsborough
10	3	8	SOUTH CAROLINA	Calhoun
10	3	8	NORTH CAROLINA	Richmond
10	3	8	FLORIDA	Broward
10	3	8	FLORIDA	Palm Beach
10	3	8	FLORIDA	Broward
10	3	8	FLORIDA	Miami-Dade
10	3	8	FLORIDA	Manatee
10	3	8	FLORIDA	Broward
10	3	8	FLORIDA	Miami-Dade
10	3	8	FLORIDA	Orange
10	3	8	FLORIDA	Miami-Dade
10	3	8	FLORIDA	Flagler
10	3	8	GEORGIA	Bulloch
10	3	8	FLORIDA	Miami-Dade
10	3	8	SOUTH CAROLINA	Richland
10	3	8	FLORIDA	Duval
10	3	8	FLORIDA	Bay
10	3	8	FLORIDA	Broward
10	3	8	VIRGINIA	Hanover
10	3	8	FLORIDA	Duval
10	3	8	FLORIDA	Duval
10	3	8	FLORIDA	Volusia
10	3	8	FLORIDA	Nassau
10	3	8	VIRGINIA	Rockbridge
10	3	8	SOUTH CAROLINA	Richland
10	3	8	FLORIDA	Duval
10	3	8	GEORGIA	Wilkinson
10	3	8	GEORGIA	Wilkinson
10	3	8	FLORIDA	Palm Beach
10	3	9	VIRGINIA	Fairfax
10	3	9	FLORIDA	Polk
10	3	9	GEORGIA	Wilkinson
10	3	9	FLORIDA	Palm Beach
10	3	9	FLORIDA	Pasco
10	3	9	FLORIDA	Miami-Dade
10	3	9	VIRGINIA	Fairfax
10	3	9	FLORIDA	Miami-Dade
10	3	9	FLORIDA	Miami-Dade
10	3	9	GEORGIA	Wilkinson
10	3	9	NORTH CAROLINA	Mecklenburg
10	3	9	SOUTH CAROLINA	Calhoun
10	3	9	FLORIDA	Palm Beach
10	3	9	NORTH CAROLINA	Lenoir
10	3	9	FLORIDA	Duval
10	3	9	VIRGINIA	Fairfax
10	3	9	VIRGINIA	Norfolk
10	3	9	FLORIDA	Brevard
10	3	9	FLORIDA	Orange
10	3	9	FLORIDA	Miami-Dade
10	3	9	FLORIDA	Duval
10	3	9	FLORIDA	Miami-Dade
10	3	9	NORTH CAROLINA	Wake
10	3	9	NORTH CAROLINA	Richmond
10	3	9	NORTH CAROLINA	Wake
10	3	9	SOUTH CAROLINA	York
10	3	9	FLORIDA	Broward
10	3	9	FLORIDA	Duval
10	3	9	SOUTH CAROLINA	Calhoun
10	3	9	GEORGIA	Newton
10	3	9	GEORGIA	Cobb
10	3	9	FLORIDA	Brevard
10	3	9	VIRGINIA	Fairfax
10	3	9	GEORGIA	DeKalb
10	3	9	FLORIDA	Volusia
10	3	9	FLORIDA	Miami-Dade
10	3	9	VIRGINIA	Norfolk
10	3	9	VIRGINIA	Chesapeake
10	3	9	FLORIDA	Palm Beach
10	3	10	NORTH CAROLINA	Guilford
10	3	10	VIRGINIA	Norfolk
10	3	10	FLORIDA	Palm Beach
10	3	10	FLORIDA	Hillsborough
10	3	10	FLORIDA	Broward
10	3	10	NORTH CAROLINA	Richmond
10	3	10	GEORGIA	Wilkinson
10	3	10	GEORGIA	Bibb
10	3	10	FLORIDA	Orange
10	3	10	FLORIDA	Orange
10	3	10	GEORGIA	Bibb
10	3	10	GEORGIA	Fulton
10	3	10	FLORIDA	Miami-Dade
10	3	10	FLORIDA	Bay
10	3	10	NORTH CAROLINA	Bladen
10	3	10	FLORIDA	Broward
10	3	10	GEORGIA	Walton
10	3	10	FLORIDA	Duval
10	3	10	NORTH CAROLINA	Richmond
10	3	10	SOUTH CAROLINA	Horry
10	3	10	SOUTH CAROLINA	Calhoun
10	3	10	NORTH CAROLINA	Cumberland
10	3	10	NORTH CAROLINA	Cumberland
10	3	10	FLORIDA	Hillsborough
10	3	10	NORTH CAROLINA	Durham
10	3	10	SOUTH CAROLINA	Berkeley
10	3	10	FLORIDA	Hillsborough
10	3	10	SOUTH CAROLINA	Calhoun
10	3	10	VIRGINIA	Rockbridge
10	3	10	FLORIDA	Manatee
10	3	10	FLORIDA	Broward
10	3	10	FLORIDA	Hillsborough
10	3	10	FLORIDA	Broward
10	3	10	NORTH CAROLINA	Durham
10	3	10	NORTH CAROLINA	Richmond
10	3	10	VIRGINIA	Virginia Beach
10	3	10	NORTH CAROLINA	Durham
10	3	10	FLORIDA	Palm Beach
10	3	10	FLORIDA	Pinellas
10	3	10	FLORIDA	Miami-Dade
10	3	10	SOUTH CAROLINA	Berkeley
10	3	10	FLORIDA	Miami-Dade
10	3	10	GEORGIA	Cobb
10	3	10	FLORIDA	Duval
10	3	10	FLORIDA	Palm Beach
10	3	10	FLORIDA	Seminole
10	3	10	FLORIDA	Manatee
10	3	10	FLORIDA	Duval
10	3	10	NORTH CAROLINA	Mecklenburg
10	3	10	NORTH CAROLINA	Wake
10	3	10	NORTH CAROLINA	Richmond
10	3	10	SOUTH CAROLINA	Greenville
10	3	10	FLORIDA	Palm Beach
10	3	10	GEORGIA	Bibb
10	3	10	SOUTH CAROLINA	Charleston
10	3	10	NORTH CAROLINA	Perquimans
10	3	10	FLORIDA	Broward
10	3	10	NORTH CAROLINA	Lee
10	3	10	VIRGINIA	Norfolk
10	3	10	FLORIDA	Miami-Dade
10	3	11	FLORIDA	Volusia
10	3	11	FLORIDA	Brevard
10	3	11	VIRGINIA	Chesapeake
10	3	11	NORTH CAROLINA	Mecklenburg
10	3	11	FLORIDA	Duval
10	3	11	SOUTH CAROLINA	Charleston
10	3	11	NORTH CAROLINA	Wake
10	3	11	VIRGINIA	Fairfax
10	3	11	NORTH CAROLINA	Orange
10	3	11	GEORGIA	Fulton
10	3	11	FLORIDA	Broward
10	3	11	FLORIDA	Sarasota
10	3	11	NORTH CAROLINA	Forsyth
10	3	11	FLORIDA	Leon
10	3	11	FLORIDA	Seminole
10	3	11	FLORIDA	Volusia
10	3	11	FLORIDA	Miami-Dade
10	3	11	GEORGIA	Chatham
10	3	11	FLORIDA	Palm Beach
10	3	11	VIRGINIA	Lynchburg
10	3	11	FLORIDA	Palm Beach
10	3	11	FLORIDA	Sarasota
10	3	11	FLORIDA	Broward
10	3	11	FLORIDA	Palm Beach
10	3	11	FLORIDA	Hillsborough
10	3	11	FLORIDA	Orange
10	3	11	FLORIDA	Miami-Dade
10	3	11	FLORIDA	Miami-Dade
10	3	11	FLORIDA	Miami-Dade
10	3	11	FLORIDA	Broward
10	3	12	SOUTH CAROLINA	Calhoun
10	3	12	NORTH CAROLINA	Mecklenburg
10	3	12	FLORIDA	Hillsborough
10	3	12	FLORIDA	Miami-Dade
10	3	12	FLORIDA	Miami-Dade
10	3	12	FLORIDA	Broward
10	3	12	VIRGINIA	Norfolk
10	3	12	FLORIDA	Palm Beach
10	3	12	NORTH CAROLINA	Richmond
10	3	12	VIRGINIA	Montgomery
10	3	12	FLORIDA	Miami-Dade
10	3	12	FLORIDA	Palm Beach
10	3	12	VIRGINIA	Rockbridge
10	3	12	GEORGIA	Cobb
10	3	12	GEORGIA	Cobb
10	3	12	SOUTH CAROLINA	Berkeley
10	3	12	VIRGINIA	Arlington
10	3	12	FLORIDA	Broward
10	3	12	FLORIDA	Miami-Dade
10	3	12	FLORIDA	Hillsborough
10	3	12	FLORIDA	Orange
10	3	12	GEORGIA	Fulton
10	3	12	FLORIDA	Broward
10	3	12	FLORIDA	Hillsborough
10	3	12	NORTH CAROLINA	Duplin
10	3	12	SOUTH CAROLINA	Charleston
10	3	12	FLORIDA	Duval
10	3	12	FLORIDA	Miami-Dade
10	3	12	GEORGIA	Wilkinson
10	3	12	FLORIDA	Duval
10	3	12	FLORIDA	Orange
10	3	12	SOUTH CAROLINA	Florence
10	3	12	FLORIDA	Hillsborough
10	3	12	NORTH CAROLINA	Richmond
10	3	12	FLORIDA	Escambia
10	3	12	VIRGINIA	Norfolk
10	3	12	VIRGINIA	Fairfax
10	3	13	NORTH CAROLINA	Guilford
10	3	13	FLORIDA	Pinellas
10	3	13	NORTH CAROLINA	Richmond
10	3	13	FLORIDA	Palm Beach
10	3	13	FLORIDA	Brevard
10	3	13	FLORIDA	Leon
10	3	13	GEORGIA	Fulton
10	3	13	SOUTH CAROLINA	Horry
10	3	13	FLORIDA	Seminole
10	3	13	NORTH CAROLINA	Mecklenburg
10	3	13	FLORIDA	Orange
10	3	13	NORTH CAROLINA	Richmond
10	3	13	FLORIDA	Hillsborough
10	3	13	NORTH CAROLINA	Wilson
10	3	13	GEORGIA	Ware
10	3	13	SOUTH CAROLINA	Spartanburg
10	3	13	FLORIDA	Orange
10	3	13	FLORIDA	Orange
10	3	13	NORTH CAROLINA	Richmond
10	3	13	VIRGINIA	Fairfax
10	3	13	VIRGINIA	Fairfax
10	3	13	SOUTH CAROLINA	Calhoun
10	3	13	SOUTH CAROLINA	Calhoun
10	3	13	FLORIDA	Miami-Dade
10	3	13	FLORIDA	Duval
10	3	14	FLORIDA	Brevard
10	3	14	GEORGIA	Wilkinson
10	3	14	VIRGINIA	Rockingham
10	3	14	GEORGIA	Glynn
10	3	14	VIRGINIA	Norfolk
10	3	14	FLORIDA	Broward
10	3	14	NORTH CAROLINA	Mecklenburg
10	3	14	NORTH CAROLINA	Mecklenburg
10	3	14	VIRGINIA	Norfolk
10	3	14	FLORIDA	Palm Beach
10	3	14	FLORIDA	Leon
10	3	14	FLORIDA	St. Johns
10	3	14	NORTH CAROLINA	Wake
10	3	14	NORTH CAROLINA	Wake
10	3	14	NORTH CAROLINA	Mecklenburg
10	3	14	FLORIDA	Orange
10	3	14	GEORGIA	Fulton
10	3	14	NORTH CAROLINA	Orange
10	3	14	FLORIDA	Broward
10	3	14	NORTH CAROLINA	Wake
10	3	14	NORTH CAROLINA	Durham
10	3	14	GEORGIA	Fulton
10	3	14	NORTH CAROLINA	Forsyth
10	3	14	VIRGINIA	Portsmouth
10	3	14	FLORIDA	Miami-Dade
10	3	14	VIRGINIA	Portsmouth
10	3	14	FLORIDA	Miami-Dade
10	3	14	FLORIDA	Miami-Dade
10	3	14	GEORGIA	Clarke
10	3	14	SOUTH CAROLINA	Horry
10	3	14	FLORIDA	Flagler
10	3	14	NORTH CAROLINA	Mecklenburg
10	3	14	NORTH CAROLINA	Mecklenburg
10	3	14	SOUTH CAROLINA	Horry
10	3	14	FLORIDA	Pinellas
10	3	14	FLORIDA	Miami-Dade
10	3	14	FLORIDA	Orange
10	3	14	FLORIDA	Pinellas
10	3	14	FLORIDA	Palm Beach
10	3	14	FLORIDA	Manatee
10	3	14	FLORIDA	Hillsborough
10	3	14	GEORGIA	Wilkinson
10	3	14	NORTH CAROLINA	Richmond
10	3	14	FLORIDA	Manatee
10	3	14	NORTH CAROLINA	Richmond
10	3	14	FLORIDA	Palm Beach
10	3	14	SOUTH CAROLINA	Calhoun
10	3	14	FLORIDA	Pinellas
10	3	14	NORTH CAROLINA	Wake
10	3	14	NORTH CAROLINA	Haywood
10	3	15	GEORGIA	Fulton
10	3	15	SOUTH CAROLINA	Horry
10	3	15	GEORGIA	Glynn
10	3	15	NORTH CAROLINA	Davidson
10	3	15	NORTH CAROLINA	Mecklenburg
10	3	15	VIRGINIA	Rockbridge
10	3	15	NORTH CAROLINA	Mecklenburg
10	3	15	FLORIDA	Broward
10	3	15	GEORGIA	Fulton
10	3	15	FLORIDA	Palm Beach
10	3	15	FLORIDA	Orange
10	3	15	SOUTH CAROLINA	Horry
10	3	15	VIRGINIA	Norfolk
10	3	15	SOUTH CAROLINA	Horry
10	3	15	FLORIDA	Miami-Dade
10	3	15	FLORIDA	Miami-Dade
10	3	15	NORTH CAROLINA	Wake
10	3	15	VIRGINIA	Norfolk
10	3	15	FLORIDA	St. Lucie
10	3	15	SOUTH CAROLINA	Charleston
10	3	15	SOUTH CAROLINA	Horry
10	3	15	NORTH CAROLINA	Durham
10	3	15	GEORGIA	Fulton
10	3	15	FLORIDA	Duval
10	3	15	FLORIDA	Duval
10	3	15	FLORIDA	Miami-Dade
10	3	15	FLORIDA	Broward
10	3	15	SOUTH CAROLINA	Charleston
10	3	15	FLORIDA	St. Johns
10	3	15	FLORIDA	Miami-Dade
10	3	15	FLORIDA	Sarasota
10	3	15	FLORIDA	Miami-Dade
10	3	15	FLORIDA	Okaloosa
10	3	15	FLORIDA	Miami-Dade
10	3	15	GEORGIA	Cherokee
10	3	15	SOUTH CAROLINA	Calhoun
10	3	15	GEORGIA	Chatham
10	3	15	FLORIDA	Miami-Dade
10	3	15	FLORIDA	Orange
10	3	15	FLORIDA	Miami-Dade
10	3	15	SOUTH CAROLINA	Berkeley
10	3	15	FLORIDA	Miami-Dade
10	3	15	FLORIDA	Miami-Dade
10	3	15	FLORIDA	Miami-Dade
10	3	15	SOUTH CAROLINA	Calhoun
10	3	15	FLORIDA	Miami-Dade
10	3	15	FLORIDA	Lee
10	3	15	FLORIDA	Miami-Dade
10	3	15	NORTH CAROLINA	Mecklenburg
10	3	15	FLORIDA	Duval
10	3	15	FLORIDA	Leon
10	3	15	FLORIDA	Palm Beach
10	3	15	FLORIDA	Broward
10	3	15	NORTH CAROLINA	Richmond
10	3	15	NORTH CAROLINA	Richmond
10	3	15	FLORIDA	Palm Beach
10	3	15	FLORIDA	Hillsborough
10	3	15	FLORIDA	Broward
10	3	15	VIRGINIA	Virginia Beach
10	3	15	NORTH CAROLINA	Mecklenburg
10	3	15	FLORIDA	Palm Beach
10	3	15	FLORIDA	Orange
10	3	15	FLORIDA	Palm Beach
10	3	15	FLORIDA	Palm Beach
10	3	15	GEORGIA	Fulton
10	3	15	FLORIDA	Bay
10	3	15	NORTH CAROLINA	Cumberland
10	3	15	FLORIDA	Duval
10	3	15	SOUTH CAROLINA	Charleston
10	3	15	NORTH CAROLINA	Richmond
10	3	16	FLORIDA	Clay
10	3	16	FLORIDA	Palm Beach
10	3	16	VIRGINIA	Norfolk
10	3	16	FLORIDA	Broward
10	3	16	SOUTH CAROLINA	Calhoun
10	3	16	NORTH CAROLINA	Dare
10	3	16	NORTH CAROLINA	Cumberland
10	3	16	VIRGINIA	Rockbridge
10	3	16	NORTH CAROLINA	Dare
10	3	16	FLORIDA	Hillsborough
10	3	16	FLORIDA	Orange
10	3	16	NORTH CAROLINA	Richmond
10	3	16	FLORIDA	Orange
10	3	16	FLORIDA	Palm Beach
10	3	16	SOUTH CAROLINA	Horry
10	3	16	FLORIDA	Pinellas
10	3	16	SOUTH CAROLINA	Calhoun
10	3	16	FLORIDA	Marion
10	3	16	NORTH CAROLINA	Mecklenburg
10	3	16	NORTH CAROLINA	Mecklenburg
10	3	16	NORTH CAROLINA	Richmond
10	3	16	NORTH CAROLINA	Chowan
10	3	16	FLORIDA	Lake
10	3	16	FLORIDA	Lee
10	3	16	FLORIDA	Palm Beach
10	3	16	FLORIDA	Miami-Dade
10	3	16	FLORIDA	Orange
10	3	16	FLORIDA	Orange
10	3	16	GEORGIA	Chatham
10	3	16	NORTH CAROLINA	Mecklenburg
10	3	16	FLORIDA	Broward
10	3	16	FLORIDA	Escambia
10	3	16	FLORIDA	Okaloosa
10	3	16	FLORIDA	Leon
10	3	16	FLORIDA	Palm Beach
10	3	16	FLORIDA	Clay
10	3	16	GEORGIA	Fulton
10	3	16	NORTH CAROLINA	Richmond
10	3	16	NORTH CAROLINA	Richmond
10	3	16	GEORGIA	Fulton
10	3	16	FLORIDA	Sarasota
10	3	16	FLORIDA	Pinellas
10	3	16	GEORGIA	Clarke
10	3	16	VIRGINIA	Lynchburg
10	3	16	FLORIDA	Miami-Dade
10	3	16	FLORIDA	Volusia
10	3	16	GEORGIA	Wilkinson
10	3	16	FLORIDA	Hillsborough
10	3	16	FLORIDA	Volusia
10	3	16	FLORIDA	Broward
10	3	16	FLORIDA	Alachua
10	3	16	SOUTH CAROLINA	Calhoun
10	3	16	NORTH CAROLINA	Guilford
10	3	16	GEORGIA	Columbia
10	3	16	GEORGIA	Fulton
10	3	16	FLORIDA	Broward
10	3	16	FLORIDA	Palm Beach
10	3	16	NORTH CAROLINA	New Hanover
10	3	16	VIRGINIA	Rockbridge
10	3	16	FLORIDA	Duval
10	3	16	NORTH CAROLINA	Mecklenburg
10	3	16	FLORIDA	Miami-Dade
10	3	16	GEORGIA	Wilkinson
10	3	16	FLORIDA	Sarasota
10	3	16	NORTH CAROLINA	Richmond
10	3	16	FLORIDA	Palm Beach
10	3	16	SOUTH CAROLINA	Horry
10	3	16	FLORIDA	Orange
10	3	16	FLORIDA	Palm Beach
10	3	16	FLORIDA	Palm Beach
10	3	16	FLORIDA	Palm Beach
10	3	16	FLORIDA	Palm Beach
10	3	16	FLORIDA	Palm Beach
10	3	16	FLORIDA	Miami-Dade
10	3	16	FLORIDA	Palm Beach
10	3	16	FLORIDA	Broward
10	3	16	NORTH CAROLINA	Mecklenburg
10	3	16	FLORIDA	Seminole
10	3	16	FLORIDA	Palm Beach
10	3	16	NORTH CAROLINA	Cabarrus
10	3	17	FLORIDA	Broward
10	3	17	NORTH CAROLINA	Hertford
10	3	17	FLORIDA	Miami-Dade
10	3	17	FLORIDA	Palm Beach
10	3	17	FLORIDA	Orange
10	3	17	VIRGINIA	Suffolk
10	3	17	SOUTH CAROLINA	Calhoun
10	3	17	FLORIDA	Leon
10	3	17	FLORIDA	Broward
10	3	17	NORTH CAROLINA	Richmond
10	3	17	NORTH CAROLINA	Wake
10	3	17	FLORIDA	Palm Beach
10	3	17	FLORIDA	Broward
10	3	17	FLORIDA	Hillsborough
10	3	17	FLORIDA	Broward
10	3	17	FLORIDA	Palm Beach
10	3	17	FLORIDA	Lee
10	3	17	FLORIDA	Palm Beach
10	3	17	FLORIDA	Palm Beach
10	3	17	FLORIDA	Lee
10	3	17	FLORIDA	Miami-Dade
10	3	17	FLORIDA	Broward
10	3	17	FLORIDA	Orange
10	3	17	FLORIDA	Palm Beach
10	3	17	FLORIDA	Broward
10	3	17	NORTH CAROLINA	Richmond
10	3	17	FLORIDA	Miami-Dade
10	3	17	FLORIDA	Palm Beach
10	3	17	NORTH CAROLINA	Cumberland
10	3	17	SOUTH CAROLINA	Calhoun
10	3	17	FLORIDA	Miami-Dade
10	3	17	SOUTH CAROLINA	Calhoun
10	3	17	NORTH CAROLINA	Craven
10	3	17	NORTH CAROLINA	Richmond
10	3	17	GEORGIA	Wilkinson
10	3	17	FLORIDA	Broward
10	3	17	SOUTH CAROLINA	Calhoun
10	3	17	FLORIDA	Broward
10	3	17	FLORIDA	Miami-Dade
10	3	17	FLORIDA	Palm Beach
10	3	17	FLORIDA	Charlotte
10	3	17	FLORIDA	Miami-Dade
10	3	17	FLORIDA	Orange
10	3	17	FLORIDA	St. Lucie
10	3	17	GEORGIA	Fulton
10	3	17	NORTH CAROLINA	Durham
10	3	17	NORTH CAROLINA	Richmond
10	3	17	NORTH CAROLINA	Richmond
10	3	17	FLORIDA	Palm Beach
10	3	17	FLORIDA	Orange
10	3	17	FLORIDA	Palm Beach
10	3	17	FLORIDA	Miami-Dade
10	3	17	VIRGINIA	Rockbridge
10	3	17	NORTH CAROLINA	New Hanover
10	3	17	NORTH CAROLINA	Wilson
10	3	17	FLORIDA	Volusia
10	3	17	FLORIDA	Miami-Dade
10	3	17	FLORIDA	Miami-Dade
10	3	17	SOUTH CAROLINA	Florence
10	3	17	FLORIDA	Miami-Dade
10	3	17	NORTH CAROLINA	Richmond
10	3	17	FLORIDA	Duval
10	3	17	FLORIDA	Volusia
10	3	17	FLORIDA	Orange
10	3	17	FLORIDA	Seminole
10	3	17	FLORIDA	Palm Beach
10	3	17	FLORIDA	Miami-Dade
10	3	17	FLORIDA	Polk
10	3	17	GEORGIA	Fulton
10	3	17	NORTH CAROLINA	Wake
10	3	17	GEORGIA	Fulton
10	3	17	SOUTH CAROLINA	Horry
10	3	17	FLORIDA	Palm Beach
10	3	17	FLORIDA	Miami-Dade
10	3	17	FLORIDA	Broward
10	3	17	FLORIDA	Palm Beach
10	3	17	FLORIDA	Miami-Dade
10	3	17	FLORIDA	Broward
10	3	17	FLORIDA	Broward
10	3	17	FLORIDA	Palm Beach
10	3	17	NORTH CAROLINA	Rowan
10	3	17	FLORIDA	Palm Beach
10	3	17	FLORIDA	Miami-Dade
10	3	17	VIRGINIA	Hampton
10	3	17	FLORIDA	Leon
10	3	17	FLORIDA	Miami-Dade
10	3	17	FLORIDA	Broward
10	3	17	FLORIDA	Broward
10	3	17	FLORIDA	Miami-Dade
10	3	17	FLORIDA	Miami-Dade
10	3	17	NORTH CAROLINA	Richmond
10	3	17	FLORIDA	Broward
10	3	17	NORTH CAROLINA	Richmond
10	3	17	NORTH CAROLINA	New Hanover
10	3	17	FLORIDA	Volusia
10	3	17	NORTH CAROLINA	Mecklenburg
10	3	17	VIRGINIA	Newport News
10	3	17	NORTH CAROLINA	Onslow
10	3	17	FLORIDA	Duval
10	3	17	GEORGIA	Clarke
10	3	17	VIRGINIA	Chesapeake
10	3	17	FLORIDA	Broward
10	3	17	FLORIDA	Sarasota
10	3	17	FLORIDA	Volusia
10	3	17	FLORIDA	Lee
10	3	17	GEORGIA	Wilkinson
10	3	17	FLORIDA	Volusia
10	3	17	GEORGIA	Wilkinson
10	3	17	FLORIDA	Martin
10	3	17	FLORIDA	Broward
10	3	17	FLORIDA	Lake
10	3	17	FLORIDA	Broward
10	3	17	FLORIDA	Palm Beach
10	3	17	FLORIDA	Orange
10	3	17	FLORIDA	Pinellas
10	3	17	FLORIDA	Miami-Dade
10	3	17	GEORGIA	Fulton
10	3	17	FLORIDA	Miami-Dade
10	3	17	FLORIDA	Miami-Dade
10	3	17	FLORIDA	Polk
10	3	17	FLORIDA	Orange
10	3	17	FLORIDA	St. Lucie
10	3	17	VIRGINIA	Virginia Beach
10	3	17	FLORIDA	Leon
10	3	17	FLORIDA	Palm Beach
10	3	17	FLORIDA	Martin
10	3	17	FLORIDA	Pasco
10	3	17	FLORIDA	Miami-Dade
10	3	17	GEORGIA	Fulton
10	3	17	FLORIDA	Lake
10	3	17	FLORIDA	Palm Beach
10	3	17	FLORIDA	Palm Beach
10	3	17	FLORIDA	Alachua
10	3	17	NORTH CAROLINA	Guilford
10	3	17	FLORIDA	Palm Beach
10	3	18	NORTH CAROLINA	Dare
10	3	18	NORTH CAROLINA	Wake
10	3	18	FLORIDA	Broward
10	3	18	FLORIDA	Escambia
10	3	18	FLORIDA	Palm Beach
10	3	18	SOUTH CAROLINA	Calhoun
10	3	18	FLORIDA	Palm Beach
10	3	18	FLORIDA	Broward
10	3	18	NORTH CAROLINA	Rowan
10	3	18	FLORIDA	Palm Beach
10	3	18	FLORIDA	Martin
10	3	18	SOUTH CAROLINA	Horry
10	3	18	NORTH CAROLINA	Harnett
10	3	18	FLORIDA	Miami-Dade
10	3	18	FLORIDA	Indian River
10	3	18	FLORIDA	Alachua
10	3	18	FLORIDA	St. Lucie
10	3	18	NORTH CAROLINA	Richmond
10	3	18	FLORIDA	Alachua
10	3	18	FLORIDA	Palm Beach
10	3	18	FLORIDA	Miami-Dade
10	3	18	FLORIDA	Martin
10	3	18	FLORIDA	Broward
10	3	18	FLORIDA	Leon
10	3	18	FLORIDA	Palm Beach
10	3	18	FLORIDA	Miami-Dade
10	3	18	FLORIDA	Escambia
10	3	18	FLORIDA	Marion
10	3	18	FLORIDA	Broward
10	3	18	FLORIDA	Palm Beach
10	3	18	FLORIDA	Indian River
10	3	18	FLORIDA	Seminole
10	3	18	NORTH CAROLINA	Richmond
10	3	18	FLORIDA	Palm Beach
10	3	18	FLORIDA	Alachua
10	3	18	FLORIDA	Broward
10	3	18	FLORIDA	Miami-Dade
10	3	18	FLORIDA	Miami-Dade
10	3	18	FLORIDA	Palm Beach
10	3	18	FLORIDA	Broward
10	3	18	FLORIDA	Broward
10	3	18	FLORIDA	Palm Beach
10	3	18	FLORIDA	Duval
10	3	18	FLORIDA	Escambia
10	3	18	FLORIDA	Miami-Dade
10	3	18	FLORIDA	Orange
10	3	18	FLORIDA	Broward
10	3	18	FLORIDA	Orange
10	3	18	FLORIDA	Orange
10	3	18	FLORIDA	Broward
10	3	18	FLORIDA	Broward
10	3	18	FLORIDA	Sarasota
10	3	18	FLORIDA	Orange
10	3	18	VIRGINIA	Rockbridge
10	3	18	NORTH CAROLINA	Richmond
10	3	18	FLORIDA	Orange
10	3	18	FLORIDA	Monroe
10	3	18	FLORIDA	Broward
10	3	18	VIRGINIA	Rockbridge
10	3	18	FLORIDA	Palm Beach
10	3	18	NORTH CAROLINA	Brunswick
10	3	18	FLORIDA	Palm Beach
10	3	18	FLORIDA	Orange
10	3	18	FLORIDA	Palm Beach
10	3	18	FLORIDA	Leon
10	3	18	FLORIDA	Escambia
10	3	18	FLORIDA	Clay
10	3	18	NORTH CAROLINA	Carteret
10	3	18	FLORIDA	St. Johns
10	3	18	NORTH CAROLINA	Richmond
10	3	18	GEORGIA	Lowndes
10	3	18	FLORIDA	Polk
10	3	18	FLORIDA	Miami-Dade
10	3	18	VIRGINIA	Chesapeake
10	3	18	FLORIDA	Miami-Dade
10	3	18	FLORIDA	St. Johns
10	3	18	VIRGINIA	Arlington
10	3	18	GEORGIA	Cobb
10	3	18	FLORIDA	Duval
10	3	18	FLORIDA	Brevard
10	3	18	FLORIDA	Pasco
10	3	18	FLORIDA	Brevard
10	3	18	NORTH CAROLINA	Harnett
10	3	18	GEORGIA	Wilkinson
10	3	18	FLORIDA	Brevard
10	3	18	FLORIDA	Miami-Dade
10	3	18	FLORIDA	Miami-Dade
10	3	18	FLORIDA	Leon
10	3	18	FLORIDA	Brevard
10	3	18	NORTH CAROLINA	Orange
10	3	18	FLORIDA	Seminole
10	3	18	FLORIDA	Charlotte
10	3	18	FLORIDA	Monroe
10	3	18	FLORIDA	Lake
10	3	18	FLORIDA	Osceola
10	3	18	FLORIDA	Miami-Dade
10	3	18	FLORIDA	Miami-Dade
10	3	18	FLORIDA	Duval
10	3	18	FLORIDA	Charlotte
10	3	18	NORTH CAROLINA	Mecklenburg
10	3	18	FLORIDA	Charlotte
10	3	18	FLORIDA	Miami-Dade
10	3	18	FLORIDA	Miami-Dade
10	3	18	FLORIDA	Volusia
10	3	18	GEORGIA	Fulton
10	3	18	GEORGIA	Bibb
10	3	18	FLORIDA	St. Lucie
10	3	18	FLORIDA	Palm Beach
10	3	18	FLORIDA	Broward
10	3	18	NORTH CAROLINA	Richmond
10	3	18	FLORIDA	Broward
10	3	18	FLORIDA	Volusia
10	3	18	FLORIDA	Palm Beach
10	3	18	FLORIDA	Volusia
10	3	18	FLORIDA	Palm Beach
10	3	18	SOUTH CAROLINA	Calhoun
10	3	18	FLORIDA	Manatee
10	3	18	SOUTH CAROLINA	Greenville
10	3	18	FLORIDA	Broward
10	3	18	FLORIDA	Broward
10	3	18	SOUTH CAROLINA	Calhoun
10	3	18	FLORIDA	Orange
10	3	18	GEORGIA	Fulton
10	3	18	FLORIDA	Miami-Dade
10	3	18	FLORIDA	Broward
10	3	18	FLORIDA	Miami-Dade
10	3	18	FLORIDA	Broward
10	3	18	SOUTH CAROLINA	Florence
10	3	18	FLORIDA	Pinellas
10	3	18	SOUTH CAROLINA	Sumter
10	3	18	FLORIDA	Pinellas
10	3	18	FLORIDA	Orange
10	3	18	FLORIDA	Volusia
10	3	18	SOUTH CAROLINA	Horry
10	3	18	FLORIDA	Miami-Dade
10	3	18	FLORIDA	Miami-Dade
10	3	18	GEORGIA	Fulton
10	3	18	FLORIDA	Brevard
10	3	18	VIRGINIA	Hampton
10	3	18	FLORIDA	Broward
10	3	18	FLORIDA	Miami-Dade
10	3	18	FLORIDA	St. Lucie
10	3	19	FLORIDA	Miami-Dade
10	3	19	FLORIDA	Miami-Dade
10	3	19	FLORIDA	Miami-Dade
10	3	19	FLORIDA	Pinellas
10	3	19	FLORIDA	Miami-Dade
10	3	19	FLORIDA	Palm Beach
10	3	19	VIRGINIA	Rockbridge
10	3	19	FLORIDA	Volusia
10	3	19	FLORIDA	Miami-Dade
10	3	19	SOUTH CAROLINA	Calhoun
10	3	19	FLORIDA	Brevard
10	3	19	GEORGIA	Wilkinson
10	3	19	FLORIDA	Brevard
10	3	19	FLORIDA	Orange
10	3	19	NORTH CAROLINA	Brunswick
10	3	19	FLORIDA	Broward
10	3	19	FLORIDA	Brevard
10	3	19	NORTH CAROLINA	Richmond
10	3	19	SOUTH CAROLINA	Charleston
10	3	19	FLORIDA	Broward
10	3	19	FLORIDA	Alachua
10	3	19	FLORIDA	Palm Beach
10	3	19	FLORIDA	Palm Beach
10	3	19	FLORIDA	Palm Beach
10	3	19	FLORIDA	Palm Beach
10	3	19	FLORIDA	St. Johns
10	3	19	FLORIDA	Palm Beach
10	3	19	FLORIDA	St. Lucie
10	3	19	FLORIDA	Palm Beach
10	3	19	FLORIDA	Broward
10	3	19	FLORIDA	Lee
10	3	19	FLORIDA	Miami-Dade
10	3	19	FLORIDA	Orange
10	3	19	FLORIDA	Miami-Dade
10	3	19	FLORIDA	Miami-Dade
10	3	19	FLORIDA	Palm Beach
10	3	19	VIRGINIA	Virginia Beach
10	3	19	FLORIDA	Indian River
10	3	19	SOUTH CAROLINA	Charleston
10	3	19	FLORIDA	Broward
10	3	19	FLORIDA	Orange
10	3	19	FLORIDA	Miami-Dade
10	3	19	VIRGINIA	Arlington
10	3	19	FLORIDA	Orange
10	3	19	FLORIDA	Pinellas
10	3	19	FLORIDA	Brevard
10	3	19	FLORIDA	Miami-Dade
10	3	19	FLORIDA	Broward
10	3	19	FLORIDA	Miami-Dade
10	3	19	FLORIDA	Broward
10	3	19	FLORIDA	Palm Beach
10	3	19	GEORGIA	Gwinnett
10	3	19	FLORIDA	Escambia
10	3	19	VIRGINIA	Prince George
10	3	19	FLORIDA	Miami-Dade
10	3	19	FLORIDA	Pinellas
10	3	19	FLORIDA	Palm Beach
10	3	19	SOUTH CAROLINA	Charleston
10	3	19	FLORIDA	Broward
10	3	19	FLORIDA	Alachua
10	3	19	VIRGINIA	Chesapeake
10	3	19	FLORIDA	Palm Beach
10	3	19	SOUTH CAROLINA	Calhoun
10	3	19	FLORIDA	Leon
10	3	19	NORTH CAROLINA	Richmond
10	3	19	FLORIDA	Miami-Dade
10	3	19	FLORIDA	Broward
10	3	19	FLORIDA	Palm Beach
10	3	19	FLORIDA	Hillsborough
10	3	19	FLORIDA	Pinellas
10	3	19	FLORIDA	Broward
10	3	19	NORTH CAROLINA	Forsyth
10	3	19	FLORIDA	Manatee
10	3	19	FLORIDA	Palm Beach
10	3	19	FLORIDA	Palm Beach
10	3	19	FLORIDA	Brevard
10	3	19	GEORGIA	Richmond
10	3	19	FLORIDA	Broward
10	3	19	FLORIDA	Miami-Dade
10	3	19	FLORIDA	Clay
10	3	19	FLORIDA	Broward
10	3	19	GEORGIA	Chatham
10	3	19	FLORIDA	Palm Beach
10	3	19	SOUTH CAROLINA	Lexington
10	3	19	FLORIDA	Broward
10	3	19	NORTH CAROLINA	Guilford
10	3	19	GEORGIA	Gwinnett
10	3	19	FLORIDA	Broward
10	3	19	FLORIDA	Orange
10	3	19	FLORIDA	Miami-Dade
10	3	19	FLORIDA	Broward
10	3	19	SOUTH CAROLINA	Dorchester
10	3	19	FLORIDA	Leon
10	3	19	SOUTH CAROLINA	Beaufort
10	3	19	NORTH CAROLINA	Richmond
10	3	19	NORTH CAROLINA	Richmond
10	3	19	FLORIDA	Palm Beach
10	3	19	NORTH CAROLINA	Wake
10	3	19	FLORIDA	Palm Beach
10	3	19	FLORIDA	Miami-Dade
10	3	19	FLORIDA	Leon
10	3	19	GEORGIA	Chatham
10	3	19	NORTH CAROLINA	Wake
10	3	19	FLORIDA	Seminole
10	3	19	FLORIDA	Miami-Dade
10	3	19	FLORIDA	Miami-Dade
10	3	19	SOUTH CAROLINA	Calhoun
10	3	19	FLORIDA	Miami-Dade
10	3	19	FLORIDA	Pinellas
10	3	19	FLORIDA	Brevard
10	3	19	SOUTH CAROLINA	Calhoun
10	3	19	FLORIDA	Miami-Dade
10	3	19	NORTH CAROLINA	Wake
10	3	19	FLORIDA	Orange
10	3	19	SOUTH CAROLINA	Beaufort
10	3	19	NORTH CAROLINA	Mecklenburg
10	3	19	SOUTH CAROLINA	Calhoun
10	3	19	FLORIDA	Leon
10	3	19	SOUTH CAROLINA	Horry
10	3	19	SOUTH CAROLINA	Calhoun
10	3	19	FLORIDA	Palm Beach
10	3	19	SOUTH CAROLINA	Charleston
10	3	19	FLORIDA	Brevard
10	3	19	NORTH CAROLINA	Richmond
10	3	19	FLORIDA	Hillsborough
10	3	19	FLORIDA	Volusia
10	3	19	NORTH CAROLINA	Rowan
10	3	19	GEORGIA	Muscogee
10	3	19	FLORIDA	St. Lucie
10	3	19	SOUTH CAROLINA	Calhoun
10	3	19	FLORIDA	Pinellas
10	3	19	FLORIDA	Pinellas
10	3	19	SOUTH CAROLINA	Charleston
10	3	19	FLORIDA	Broward
10	3	19	FLORIDA	Palm Beach
10	3	19	FLORIDA	Lee
10	3	19	FLORIDA	Collier
10	3	19	VIRGINIA	Virginia Beach
10	3	19	NORTH CAROLINA	Wake
10	3	19	SOUTH CAROLINA	Calhoun
10	3	19	NORTH CAROLINA	Richmond
10	3	20	VIRGINIA	Virginia Beach
10	3	20	FLORIDA	Broward
10	3	20	FLORIDA	Miami-Dade
10	3	20	FLORIDA	Miami-Dade
10	3	20	FLORIDA	Osceola
10	3	20	FLORIDA	Palm Beach
10	3	20	FLORIDA	Clay
10	3	20	NORTH CAROLINA	Forsyth
10	3	20	FLORIDA	Miami-Dade
10	3	20	FLORIDA	Broward
10	3	20	FLORIDA	Broward
10	3	20	FLORIDA	Miami-Dade
10	3	20	FLORIDA	Broward
10	3	20	FLORIDA	Orange
10	3	20	SOUTH CAROLINA	Calhoun
10	3	20	SOUTH CAROLINA	Calhoun
10	3	20	SOUTH CAROLINA	Calhoun
10	3	20	NORTH CAROLINA	Richmond
10	3	20	FLORIDA	Volusia
10	3	20	SOUTH CAROLINA	Calhoun
10	3	20	SOUTH CAROLINA	Horry
10	3	20	FLORIDA	Pinellas
10	3	20	NORTH CAROLINA	Wake
10	3	20	FLORIDA	Leon
10	3	20	FLORIDA	Broward
10	3	20	FLORIDA	St. Lucie
10	3	20	SOUTH CAROLINA	Calhoun
10	3	20	GEORGIA	Wilkinson
10	3	20	SOUTH CAROLINA	Horry
10	3	20	FLORIDA	Palm Beach
10	3	20	NORTH CAROLINA	Richmond
10	3	20	FLORIDA	Palm Beach
10	3	20	FLORIDA	Palm Beach
10	3	20	FLORIDA	Volusia
10	3	20	FLORIDA	Leon
10	3	20	FLORIDA	Pinellas
10	3	20	GEORGIA	Wilkinson
10	3	20	FLORIDA	Miami-Dade
10	3	20	FLORIDA	Broward
10	3	20	FLORIDA	Brevard
10	3	20	GEORGIA	Tift
10	3	20	VIRGINIA	Rockbridge
10	3	20	FLORIDA	Broward
10	3	20	SOUTH CAROLINA	Spartanburg
10	3	20	FLORIDA	Palm Beach
10	3	20	FLORIDA	Osceola
10	3	20	VIRGINIA	Rockbridge
10	3	20	GEORGIA	Wilkinson
10	3	20	NORTH CAROLINA	Richmond
10	3	20	FLORIDA	Indian River
10	3	20	FLORIDA	Leon
10	3	20	FLORIDA	Duval
10	3	20	FLORIDA	Duval
10	3	20	FLORIDA	Miami-Dade
10	3	20	FLORIDA	Leon
10	3	20	FLORIDA	Leon
10	3	20	FLORIDA	Hillsborough
10	3	20	VIRGINIA	Rockbridge
10	3	20	GEORGIA	Fulton
10	3	20	VIRGINIA	Norfolk
10	3	20	FLORIDA	Broward
10	3	20	FLORIDA	Pinellas
10	3	20	NORTH CAROLINA	Cumberland
10	3	20	FLORIDA	Miami-Dade
10	3	20	FLORIDA	Broward
10	3	20	VIRGINIA	Fairfax
10	3	20	FLORIDA	Hillsborough
10	3	20	NORTH CAROLINA	Durham
10	3	20	FLORIDA	Broward
10	3	20	FLORIDA	Palm Beach
10	3	20	FLORIDA	Broward
10	3	20	FLORIDA	Seminole
10	3	20	FLORIDA	Palm Beach
10	3	20	FLORIDA	Palm Beach
10	3	20	FLORIDA	Miami-Dade
10	3	20	FLORIDA	Palm Beach
10	3	20	FLORIDA	Martin
10	3	20	FLORIDA	Bay
10	3	20	FLORIDA	Miami-Dade
10	3	20	FLORIDA	Palm Beach
10	3	20	VIRGINIA	Virginia Beach
10	3	20	FLORIDA	Broward
10	3	20	FLORIDA	Miami-Dade
10	3	20	GEORGIA	Wilkinson
10	3	20	FLORIDA	Miami-Dade
10	3	20	SOUTH CAROLINA	Calhoun
10	3	20	FLORIDA	Brevard
10	3	20	FLORIDA	Miami-Dade
10	3	20	FLORIDA	Sarasota
10	3	20	FLORIDA	Polk
10	3	20	FLORIDA	Broward
10	3	20	VIRGINIA	Warren
10	3	20	FLORIDA	Duval
10	3	20	FLORIDA	Palm Beach
10	3	20	NORTH CAROLINA	Wake
10	3	20	FLORIDA	Palm Beach
10	3	20	FLORIDA	Orange
10	3	20	FLORIDA	Hillsborough
10	3	20	FLORIDA	Broward
10	3	20	FLORIDA	St. Lucie
10	3	20	FLORIDA	Orange
10	3	20	NORTH CAROLINA	Wake
10	3	20	FLORIDA	Broward
10	3	20	FLORIDA	Broward
10	3	20	FLORIDA	Palm Beach
10	3	20	FLORIDA	Palm Beach
10	3	20	NORTH CAROLINA	Wake
10	3	20	SOUTH CAROLINA	Calhoun
10	3	20	FLORIDA	Broward
10	3	20	FLORIDA	Broward
10	3	20	FLORIDA	Broward
10	3	20	VIRGINIA	Rockbridge
10	3	20	FLORIDA	Palm Beach
10	3	20	FLORIDA	Hillsborough
10	3	20	FLORIDA	Miami-Dade
10	3	20	FLORIDA	Miami-Dade
10	3	20	VIRGINIA	Prince William
10	3	20	VIRGINIA	Norfolk
10	3	20	FLORIDA	Miami-Dade
10	3	20	FLORIDA	Broward
10	3	20	GEORGIA	Camden
10	3	20	NORTH CAROLINA	Randolph
10	3	20	FLORIDA	Broward
10	3	20	FLORIDA	Pinellas
10	3	20	VIRGINIA	Norfolk
10	3	20	FLORIDA	St. Johns
10	3	20	FLORIDA	Miami-Dade
10	3	20	FLORIDA	Broward
10	3	20	FLORIDA	Miami-Dade
10	3	20	VIRGINIA	Rockbridge
10	3	20	VIRGINIA	Newport News
10	3	20	FLORIDA	Miami-Dade
10	3	20	GEORGIA	Clarke
10	3	20	VIRGINIA	Hampton
10	3	20	GEORGIA	Clarke
10	3	20	FLORIDA	Brevard
10	3	20	FLORIDA	Palm Beach
10	3	20	VIRGINIA	Rockbridge
10	3	20	FLORIDA	Broward
10	3	20	FLORIDA	Palm Beach
10	3	20	FLORIDA	Miami-Dade
10	3	21	FLORIDA	Palm Beach
10	3	21	FLORIDA	Miami-Dade
10	3	21	FLORIDA	Hillsborough
10	3	21	FLORIDA	Manatee
10	3	21	FLORIDA	St. Johns
10	3	21	FLORIDA	Palm Beach
10	3	21	FLORIDA	Gadsden
10	3	21	FLORIDA	Broward
10	3	21	FLORIDA	Sarasota
10	3	21	SOUTH CAROLINA	Charleston
10	3	21	FLORIDA	Miami-Dade
10	3	21	FLORIDA	Leon
10	3	21	FLORIDA	Lake
10	3	21	FLORIDA	Lake
10	3	21	FLORIDA	Broward
10	3	21	FLORIDA	Hillsborough
10	3	21	SOUTH CAROLINA	Lancaster
10	3	21	FLORIDA	Orange
10	3	21	FLORIDA	Lake
10	3	21	FLORIDA	Broward
10	3	21	FLORIDA	Orange
10	3	21	FLORIDA	Collier
10	3	21	FLORIDA	Broward
10	3	21	FLORIDA	Palm Beach
10	3	21	NORTH CAROLINA	Rowan
10	3	21	SOUTH CAROLINA	Charleston
10	3	21	VIRGINIA	Fairfax
10	3	21	FLORIDA	Palm Beach
10	3	21	SOUTH CAROLINA	Calhoun
10	3	21	FLORIDA	Miami-Dade
10	3	21	SOUTH CAROLINA	Calhoun
10	3	21	GEORGIA	Wilkinson
10	3	21	FLORIDA	Hillsborough
10	3	21	FLORIDA	Volusia
10	3	21	FLORIDA	Palm Beach
10	3	21	FLORIDA	Palm Beach
10	3	21	FLORIDA	Broward
10	3	21	FLORIDA	Duval
10	3	21	FLORIDA	Palm Beach
10	3	21	FLORIDA	Palm Beach
10	3	21	FLORIDA	Broward
10	3	21	NORTH CAROLINA	New Hanover
10	3	21	FLORIDA	Pinellas
10	3	21	GEORGIA	Wilkinson
10	3	21	FLORIDA	Broward
10	3	21	VIRGINIA	Rockbridge
10	3	21	VIRGINIA	Rockbridge
10	3	21	FLORIDA	Palm Beach
10	3	21	FLORIDA	Leon
10	3	21	FLORIDA	Martin
10	3	21	FLORIDA	Broward
10	3	21	NORTH CAROLINA	Richmond
10	3	21	FLORIDA	Orange
10	3	21	FLORIDA	Leon
10	3	21	FLORIDA	Miami-Dade
10	3	21	FLORIDA	Volusia
10	3	21	FLORIDA	Lee
10	3	21	FLORIDA	Broward
10	3	21	NORTH CAROLINA	Richmond
10	3	21	GEORGIA	Gwinnett
10	3	21	FLORIDA	Palm Beach
10	3	21	NORTH CAROLINA	Mecklenburg
10	3	21	FLORIDA	Palm Beach
10	3	21	NORTH CAROLINA	Randolph
10	3	21	FLORIDA	Palm Beach
10	3	21	SOUTH CAROLINA	Calhoun
10	3	21	FLORIDA	Broward
10	3	21	FLORIDA	Brevard
10	3	21	FLORIDA	Broward
10	3	21	FLORIDA	Brevard
10	3	21	GEORGIA	Fulton
10	3	21	NORTH CAROLINA	Mecklenburg
10	3	21	FLORIDA	Orange
10	3	21	FLORIDA	Miami-Dade
10	3	21	VIRGINIA	Chesterfield
10	3	21	FLORIDA	Broward
10	3	21	FLORIDA	Osceola
10	3	21	FLORIDA	Brevard
10	3	21	FLORIDA	Miami-Dade
10	3	21	GEORGIA	Wilkinson
10	3	21	NORTH CAROLINA	Randolph
10	3	21	FLORIDA	Broward
10	3	21	NORTH CAROLINA	Richmond
10	3	21	FLORIDA	Palm Beach
10	3	21	FLORIDA	Flagler
10	3	21	FLORIDA	Broward
10	3	21	FLORIDA	St. Lucie
10	3	21	SOUTH CAROLINA	Lexington
10	3	21	FLORIDA	Broward
10	3	21	NORTH CAROLINA	Richmond
10	3	21	FLORIDA	Palm Beach
10	3	21	FLORIDA	Broward
10	3	21	FLORIDA	Miami-Dade
10	3	21	SOUTH CAROLINA	Calhoun
10	3	21	SOUTH CAROLINA	Charleston
10	3	21	NORTH CAROLINA	Richmond
10	3	21	FLORIDA	Broward
10	3	21	VIRGINIA	Rockbridge
10	3	21	FLORIDA	Palm Beach
10	3	21	VIRGINIA	Rockbridge
10	3	21	FLORIDA	Sarasota
10	3	21	NORTH CAROLINA	Onslow
10	3	21	FLORIDA	Duval
10	3	21	NORTH CAROLINA	Mecklenburg
10	3	21	SOUTH CAROLINA	Georgetown
10	3	21	FLORIDA	Sarasota
10	3	21	VIRGINIA	Harrisonburg
10	3	21	FLORIDA	Sarasota
10	3	21	FLORIDA	Brevard
10	3	21	NORTH CAROLINA	Richmond
10	3	21	FLORIDA	Lee
10	3	21	FLORIDA	Orange
10	3	21	GEORGIA	Wilkinson
10	3	21	FLORIDA	Brevard
10	3	21	FLORIDA	Miami-Dade
10	3	21	FLORIDA	Miami-Dade
10	3	21	FLORIDA	Miami-Dade
10	3	21	FLORIDA	Orange
10	3	21	FLORIDA	Collier
10	3	21	NORTH CAROLINA	Richmond
10	3	21	GEORGIA	Clarke
10	3	22	GEORGIA	Wilkinson
10	3	22	VIRGINIA	Lynchburg
10	3	22	GEORGIA	Wilkinson
10	3	22	FLORIDA	Miami-Dade
10	3	22	FLORIDA	Manatee
10	3	22	VIRGINIA	Chesapeake
10	3	22	FLORIDA	Seminole
10	3	22	FLORIDA	Duval
10	3	22	FLORIDA	Duval
10	3	22	NORTH CAROLINA	Richmond
10	3	22	SOUTH CAROLINA	Dorchester
10	3	22	FLORIDA	Miami-Dade
10	3	22	FLORIDA	Palm Beach
10	3	22	FLORIDA	Orange
10	3	22	FLORIDA	Miami-Dade
10	3	22	FLORIDA	Flagler
10	3	22	FLORIDA	Miami-Dade
10	3	22	FLORIDA	Miami-Dade
10	3	22	FLORIDA	Miami-Dade
10	3	22	FLORIDA	Miami-Dade
10	3	22	FLORIDA	Miami-Dade
10	3	22	GEORGIA	DeKalb
10	3	22	FLORIDA	Miami-Dade
10	3	22	GEORGIA	Wilkinson
10	3	22	FLORIDA	Broward
10	3	22	FLORIDA	Miami-Dade
10	3	22	FLORIDA	Broward
10	3	22	FLORIDA	Broward
10	3	22	NORTH CAROLINA	Richmond
10	3	22	FLORIDA	Broward
10	3	22	FLORIDA	Broward
10	3	22	FLORIDA	Brevard
10	3	22	SOUTH CAROLINA	Calhoun
10	3	22	VIRGINIA	Prince George
10	3	22	FLORIDA	Broward
10	3	22	FLORIDA	Broward
10	3	22	FLORIDA	Pasco
10	3	22	FLORIDA	Miami-Dade
10	3	22	FLORIDA	Hillsborough
10	3	22	FLORIDA	Broward
10	3	22	NORTH CAROLINA	Randolph
10	3	22	FLORIDA	Broward
10	3	22	FLORIDA	Indian River
10	3	22	GEORGIA	Bryan
10	3	22	NORTH CAROLINA	Wake
10	3	22	FLORIDA	Miami-Dade
10	3	22	SOUTH CAROLINA	Cherokee
10	3	22	NORTH CAROLINA	Richmond
10	3	22	FLORIDA	Martin
10	3	22	FLORIDA	Palm Beach
10	3	22	FLORIDA	Miami-Dade
10	3	22	FLORIDA	Broward
10	3	22	FLORIDA	Miami-Dade
10	3	22	FLORIDA	Leon
10	3	22	SOUTH CAROLINA	Calhoun
10	3	22	FLORIDA	Volusia
10	3	22	FLORIDA	St. Lucie
10	3	22	FLORIDA	Broward
10	3	22	FLORIDA	Orange
10	3	22	FLORIDA	Broward
10	3	22	FLORIDA	Miami-Dade
10	3	22	FLORIDA	Palm Beach
10	3	22	NORTH CAROLINA	Pasquotank
10	3	22	FLORIDA	St. Johns
10	3	22	FLORIDA	Orange
10	3	22	VIRGINIA	Roanoke
10	3	22	NORTH CAROLINA	Richmond
10	3	22	VIRGINIA	Rockbridge
10	3	22	SOUTH CAROLINA	Calhoun
10	3	22	FLORIDA	Palm Beach
10	3	22	NORTH CAROLINA	Wake
10	3	22	FLORIDA	Polk
10	3	22	FLORIDA	Broward
10	3	22	FLORIDA	Miami-Dade
10	3	22	FLORIDA	Miami-Dade
10	3	22	FLORIDA	Miami-Dade
10	3	22	FLORIDA	Palm Beach
10	3	22	FLORIDA	Miami-Dade
10	3	22	FLORIDA	Miami-Dade
10	3	22	FLORIDA	Orange
10	3	22	GEORGIA	Clarke
10	3	22	FLORIDA	Palm Beach
10	3	22	GEORGIA	Wilkinson
10	3	22	FLORIDA	St. Lucie
10	3	22	NORTH CAROLINA	Pasquotank
10	3	22	FLORIDA	Miami-Dade
10	3	22	FLORIDA	Broward
10	3	22	GEORGIA	Wilkinson
10	3	22	FLORIDA	Pinellas
10	3	22	GEORGIA	Clarke
10	3	22	FLORIDA	Miami-Dade
10	3	22	SOUTH CAROLINA	Calhoun
10	3	22	FLORIDA	Hillsborough
10	3	22	NORTH CAROLINA	Richmond
10	3	22	FLORIDA	Hillsborough
10	3	22	FLORIDA	Alachua
10	3	22	FLORIDA	Brevard
10	3	22	NORTH CAROLINA	New Hanover
10	3	22	FLORIDA	Orange
10	3	22	NORTH CAROLINA	Wake
10	3	22	FLORIDA	Miami-Dade
10	3	22	FLORIDA	Hillsborough
10	3	22	FLORIDA	Broward
10	3	22	FLORIDA	St. Lucie
10	3	22	FLORIDA	Broward
10	3	22	FLORIDA	Miami-Dade
10	3	22	FLORIDA	Miami-Dade
10	3	22	FLORIDA	Palm Beach
10	3	22	FLORIDA	Miami-Dade
10	3	22	SOUTH CAROLINA	Kershaw
10	3	22	GEORGIA	Wilkinson
10	3	22	VIRGINIA	Fairfax
10	3	22	GEORGIA	Fulton
10	3	22	FLORIDA	Charlotte
10	3	22	NORTH CAROLINA	Richmond
10	3	22	FLORIDA	Orange
10	3	22	FLORIDA	Miami-Dade
10	3	23	FLORIDA	Miami-Dade
10	3	23	FLORIDA	Brevard
10	3	23	FLORIDA	Miami-Dade
10	3	23	FLORIDA	St. Lucie
10	3	23	FLORIDA	Orange
10	3	23	FLORIDA	Orange
10	3	23	GEORGIA	Wilkinson
10	3	23	FLORIDA	Broward
10	3	23	FLORIDA	Palm Beach
10	3	23	FLORIDA	Osceola
10	3	23	FLORIDA	Miami-Dade
10	3	23	FLORIDA	Polk
10	3	23	FLORIDA	Miami-Dade
10	3	23	FLORIDA	Orange
10	3	23	GEORGIA	Wilkinson
10	3	23	FLORIDA	Broward
10	3	23	FLORIDA	Miami-Dade
10	3	23	FLORIDA	Leon
10	3	23	FLORIDA	Miami-Dade
10	3	23	FLORIDA	Broward
10	3	23	FLORIDA	Indian River
10	3	23	FLORIDA	Miami-Dade
10	3	23	FLORIDA	Palm Beach
10	3	23	FLORIDA	Hillsborough
10	3	23	GEORGIA	Lumpkin
10	3	23	FLORIDA	Broward
10	3	23	FLORIDA	Miami-Dade
10	3	23	FLORIDA	Broward
10	3	23	FLORIDA	Miami-Dade
10	3	23	FLORIDA	Indian River
10	3	23	FLORIDA	Miami-Dade
10	3	23	FLORIDA	Martin
10	3	23	FLORIDA	Palm Beach
10	3	23	FLORIDA	Broward
10	3	23	NORTH CAROLINA	Wake
10	3	23	VIRGINIA	Fairfax
10	3	23	NORTH CAROLINA	Richmond
10	3	23	FLORIDA	Volusia
10	3	23	SOUTH CAROLINA	Calhoun
10	3	23	GEORGIA	Wilkinson
10	3	23	FLORIDA	Miami-Dade
10	3	23	SOUTH CAROLINA	Lexington
10	3	23	SOUTH CAROLINA	Charleston
10	3	23	FLORIDA	Broward
10	3	23	FLORIDA	Hillsborough
10	3	23	FLORIDA	Pinellas
10	3	23	FLORIDA	Broward
10	3	23	FLORIDA	Miami-Dade
10	3	23	FLORIDA	Hillsborough
10	3	23	SOUTH CAROLINA	Calhoun
10	3	23	SOUTH CAROLINA	Horry
10	3	23	FLORIDA	Broward
10	3	23	FLORIDA	Volusia
10	3	23	FLORIDA	Palm Beach
10	3	23	SOUTH CAROLINA	Calhoun
10	3	23	GEORGIA	Chatham
10	3	23	FLORIDA	Seminole
10	3	23	VIRGINIA	Charlottesville
10	3	23	FLORIDA	Palm Beach
10	3	23	FLORIDA	Brevard
10	3	23	VIRGINIA	Charlottesville
10	3	23	FLORIDA	Miami-Dade
10	3	23	FLORIDA	Broward
10	3	23	NORTH CAROLINA	New Hanover
10	3	23	VIRGINIA	Rockbridge
10	3	23	SOUTH CAROLINA	Calhoun
10	3	23	FLORIDA	Miami-Dade
10	3	23	FLORIDA	Miami-Dade
10	3	23	SOUTH CAROLINA	Calhoun
10	3	23	FLORIDA	Brevard
10	3	23	NORTH CAROLINA	Mecklenburg
10	3	23	FLORIDA	Broward
10	3	23	VIRGINIA	Newport News
10	3	23	FLORIDA	Broward
10	3	23	SOUTH CAROLINA	Calhoun
10	3	23	NORTH CAROLINA	Richmond
10	3	23	FLORIDA	Miami-Dade
10	3	23	SOUTH CAROLINA	Calhoun
10	3	23	FLORIDA	Broward
10	3	23	NORTH CAROLINA	Richmond
10	3	23	FLORIDA	Broward
10	3	23	FLORIDA	Miami-Dade
10	3	23	FLORIDA	Broward
10	3	23	FLORIDA	Miami-Dade
10	3	23	FLORIDA	Palm Beach
10	3	23	NORTH CAROLINA	Richmond
10	3	23	GEORGIA	Fulton
10	3	23	FLORIDA	Broward
10	3	23	FLORIDA	Orange
10	3	23	FLORIDA	Miami-Dade
[truncated: 62,190 more rows]

## Sheet: FL_evac
Time	Tweets hourly	Tweets daily
0	1	14
1	0	14
2	0	14
3	0	14
4	0	14
5	0	14
6	0	14
7	0	14
8	0	14
9	1	14
10	0	14
11	2	14
12	1	14
13	0	14
14	1	14
15	0	14
16	0	14
17	0	14
18	1	14
19	1	14
20	1	14
21	1	14
22	3	14
23	1	14
0	0	45
1	0	45
2	0	45
3	0	45
4	0	45
5	1	45
6	0	45
7	1	45
8	1	45
9	1	45
10	1	45
11	1	45
12	1	45
13	0	45
14	1	45
15	1	45
16	1	45
17	2	45
18	4	45
19	6	45
20	5	45
21	9	45
22	3	45
23	6	45
0	0	837
1	3	837
2	1	837
3	0	837
4	3	837
5	0	837
6	4	837
7	5	837
8	5	837
9	5	837
10	13	837
11	19	837
12	15	837
13	30	837
14	24	837
15	124	837
16	147	837
17	90	837
18	84	837
19	74	837
20	69	837
21	38	837
22	48	837
23	36	837
0	18	1184
1	16	1184
2	8	1184
3	2	1184
4	7	1184
5	10	1184
6	19	1184
7	36	1184
8	47	1184
9	79	1184
10	71	1184
11	77	1184
12	75	1184
13	91	1184
14	67	1184
15	93	1184
16	59	1184
17	64	1184
18	100	1184
19	65	1184
20	53	1184
21	54	1184
22	43	1184
23	30	1184
0	26	1776
1	10	1776
2	5	1776
3	4	1776
4	5	1776
5	8	1776
6	24	1776
7	49	1776
8	100	1776
9	121	1776
10	179	1776
11	151	1776
12	142	1776
13	118	1776
14	102	1776
15	107	1776
16	90	1776
17	79	1776
18	107	1776
19	91	1776
20	82	1776
21	71	1776
22	69	1776
23	36	1776
0	22	668
1	27	668
2	4	668
3	11	668
4	5	668
5	9	668
6	22	668
7	22	668
8	36	668
9	32	668
10	38	668
11	82	668
12	42	668
13	54	668
14	47	668
15	41	668
16	28	668
17	22	668
18	38	668
19	22	668
20	21	668
21	13	668
22	20	668
23	10	668
0	8	272
1	4	272
2	5	272
3	1	272
4	1	272
5	6	272
6	2	272
7	10	272
8	10	272
9	22	272
10	33	272
11	16	272
12	19	272
13	11	272
14	21	272
15	16	272
16	13	272
17	8	272
18	16	272
19	9	272
20	8	272
21	17	272
22	9	272
23	7	272
0	5	165
1	2	165
2	1	165
3	1	165
4	0	165
5	1	165
6	3	165
7	2	165
8	4	165
9	7	165
10	12	165
11	14	165
12	11	165
13	9	165
14	17	165
15	4	165
16	10	165
17	17	165
18	11	165
19	9	165
20	13	165
21	1	165
22	6	165
23	5	165
0	1	132
1	6	132
2	0	132
3	0	132
4	1	132
5	0	132
6	1	132
7	1	132
8	10	132
9	5	132
10	5	132
11	15	132
12	11	132
13	11	132
14	6	132
15	11	132
16	9	132
17	4	132
18	3	132
19	6	132
20	4	132
21	11	132
22	6	132
23	5	132
0	2	75
1	2	75
2	0	75
3	0	75
4	0	75
5	2	75
6	2	75
7	2	75
8	6	75
9	7	75
10	5	75
11	7	75
12	8	75
13	4	75
14	3	75
15	4	75
16	4	75
17	4	75
18	1	75
19	3	75
20	0	75
21	3	75
22	3	75
23	3	75

## Sheet: GA_evac
Time	Tweets hourly	Tweets daily
0	0	0
1	0	0
2	0	0
3	0	0
4	0	0
5	0	0
6	0	0
7	0	0
8	0	0
9	0	0
10	0	0
11	0	0
12	0	0
13	0	0
14	0	0
15	0	0
16	0	0
17	0	0
18	0	0
19	0	0
20	0	0
21	0	0
22	0	0
23	0	0
0	0	2
1	0	2
2	0	2
3	0	2
4	0	2
5	0	2
6	0	2
7	0	2
8	0	2
9	0	2
10	0	2
11	0	2
12	0	2
13	0	2
14	0	2
15	0	2
16	0	2
17	0	2
18	1	2
19	0	2
20	0	2
21	0	2
22	1	2
23	0	2
0	0	95
1	0	95
2	0	95
3	0	95
4	0	95
5	0	95
6	1	95
7	0	95
8	0	95
9	0	95
10	1	95
11	1	95
12	1	95
13	2	95
14	3	95
15	10	95
16	12	95
17	11	95
18	11	95
19	13	95
20	11	95
21	3	95
22	5	95
23	10	95
0	1	166
1	5	166
2	0	166
3	0	166
4	0	166
5	0	166
6	3	166
7	5	166
8	5	166
9	9	166
10	10	166
11	8	166
12	11	166
13	10	166
14	10	166
15	13	166
16	9	166
17	11	166
18	12	166
19	14	166
20	8	166
21	9	166
22	9	166
23	4	166
0	6	509
1	2	509
2	1	509
3	0	509
4	2	509
5	3	509
6	5	509
7	8	509
8	19	509
9	34	509
10	77	509
11	38	509
12	30	509
13	32	509
14	31	509
15	29	509
16	25	509
17	24	509
18	29	509
19	24	509
20	31	509
21	20	509
22	25	509
23	14	509
0	6	211
1	10	211
2	0	211
3	2	211
4	1	211
5	3	211
6	9	211
7	7	211
8	13	211
9	12	211
10	7	211
11	26	211
12	10	211
13	19	211
14	18	211
15	15	211
16	9	211
17	4	211
18	10	211
19	8	211
20	8	211
21	1	211
22	10	211
23	3	211
0	4	79
1	1	79
2	2	79
3	0	79
4	1	79
5	2	79
6	0	79
7	3	79
8	4	79
9	7	79
10	9	79
11	6	79
12	6	79
13	3	79
14	4	79
15	3	79
16	2	79
17	1	79
18	5	79
19	4	79
20	1	79
21	6	79
22	4	79
23	1	79
0	2	45
1	1	45
2	1	45
3	0	45
4	0	45
5	0	45
6	1	45
7	2	45
8	0	45
9	3	45
10	7	45
11	3	45
12	2	45
13	5	45
14	2	45
15	1	45
16	2	45
17	2	45
18	2	45
19	2	45
20	2	45
21	1	45
22	3	45
23	1	45
0	1	39
1	1	39
2	0	39
3	0	39
4	0	39
5	0	39
6	0	39
7	1	39
8	5	39
9	2	39
10	3	39
11	5	39
12	4	39
13	0	39
14	1	39
15	3	39
16	3	39
17	3	39
18	0	39
19	2	39
20	3	39
21	1	39
22	0	39
23	1	39
0	0	22
1	1	22
2	0	22
3	0	22
4	0	22
5	1	22
6	0	22
7	0	22
8	1	22
9	0	22
10	2	22
11	5	22
12	0	22
13	0	22
14	0	22
15	2	22
16	1	22
17	1	22
18	1	22
19	2	22
20	0	22
21	0	22
22	2	22
23	3	22

## Sheet: SC_evac
Time	Tweets hourly	Tweets daily
0	1	2
1	0	2
2	0	2
3	0	2
4	0	2
5	0	2
6	0	2
7	0	2
8	0	2
9	0	2
10	0	2
11	0	2
12	0	2
13	0	2
14	0	2
15	0	2
16	0	2
17	0	2
18	0	2
19	0	2
20	0	2
21	1	2
22	0	2
23	0	2
0	0	13
1	0	13
2	0	13
3	0	13
4	0	13
5	0	13
6	0	13
7	0	13
8	0	13
9	0	13
10	0	13
11	0	13
12	0	13
13	0	13
14	0	13
15	0	13
16	0	13
17	1	13
18	0	13
19	3	13
20	3	13
21	2	13
22	0	13
23	4	13
0	0	471
1	0	471
2	0	471
3	0	471
4	0	471
5	0	471
6	0	471
7	4	471
8	2	471
9	1	471
10	2	471
11	10	471
12	9	471
13	12	471
14	17	471
15	89	471
16	103	471
17	57	471
18	50	471
19	35	471
20	32	471
21	14	471
22	23	471
23	11	471
0	7	340
1	4	340
2	2	340
3	1	340
4	6	340
5	2	340
6	5	340
7	14	340
8	21	340
9	32	340
10	33	340
11	19	340
12	17	340
13	23	340
14	18	340
15	27	340
16	17	340
17	22	340
18	24	340
19	14	340
20	7	340
21	12	340
22	7	340
23	6	340
0	4	264
1	3	264
2	0	264
3	0	264
4	0	264
5	0	264
6	5	264
7	8	264
8	9	264
9	26	264
10	14	264
11	15	264
12	25	264
13	18	264
14	11	264
15	11	264
16	14	264
17	14	264
18	32	264
19	16	264
20	10	264
21	9	264
22	11	264
23	9	264
0	4	175
1	6	175
2	2	175
3	2	175
4	0	175
5	2	175
6	5	175
7	10	175
8	4	175
9	6	175
10	16	175
11	24	175
12	14	175
13	11	175
14	13	175
15	6	175
16	5	175
17	6	175
18	15	175
19	4	175
20	8	175
21	4	175
22	6	175
23	2	175
0	3	66
1	1	66
2	2	66
3	0	66
4	0	66
5	1	66
6	0	66
7	5	66
8	4	66
9	4	66
10	11	66
11	4	66
12	5	66
13	0	66
14	5	66
15	5	66
16	3	66
17	2	66
18	3	66
19	2	66
20	2	66
21	2	66
22	1	66
23	1	66
0	0	36
1	0	36
2	0	36
3	1	36
4	0	36
5	0	36
6	0	36
7	0	36
8	1	36
9	1	36
10	0	36
11	6	36
12	2	36
13	3	36
14	5	36
15	3	36
16	4	36
17	4	36
18	2	36
19	1	36
20	3	36
21	0	36
22	0	36
23	0	36
0	0	18
1	2	18
2	0	18
3	0	18
4	0	18
5	0	18
6	1	18
7	0	18
8	1	18
9	1	18
10	0	18
11	1	18
12	2	18
13	3	18
14	1	18
15	0	18
16	0	18
17	0	18
18	0	18
19	1	18
20	0	18
21	4	18
22	1	18
23	0	18
0	1	16
1	1	16
2	0	16
3	0	16
4	0	16
5	0	16
6	1	16
7	1	16
8	0	16
9	2	16
10	1	16
11	0	16
12	6	16
13	0	16
14	1	16
15	0	16
16	2	16
17	0	16
18	0	16
19	0	16
20	0	16
21	0	16
22	0	16
23	0	16

## Sheet: Hoja19
Rótulos de fila	Cuenta de username
2	592
0	39
1	11
2	13
3	7
4	1
5	3
6	7
7	25
8	25
9	16
10	32
11	27
12	29
13	32
14	25
15	12
16	24
17	36
18	35
19	54
20	47
21	36
22	31
23	25
3	1467
0	9
1	4
2	5
3	6
4	8
5	17
6	20
7	23
8	37
9	39
10	60
11	30
12	37
13	25
14	50
15	70
16	80
17	135
18	142
19	141
20	141
21	121
22	117
23	150
4	6874
0	76
1	39
2	19
3	9
4	21
5	56
6	90
7	139
8	206
9	232
10	268
11	345
12	293
13	303
14	320
15	491
16	582
17	582
18	656
19	606
20	521
21	336
22	320
23	364
5	11566
0	213
1	108
2	52
3	20
4	36
5	92
6	174
7	278
8	405
9	581
10	680
11	794
12	747
13	784
14	698
15	708
16	697
17	713
18	751
19	759
20	736
21	569
22	513
23	458
6	18833
0	289
1	163
2	85
3	48
4	62
5	123
6	226
7	360
8	677
9	897
10	1099
11	1195
12	1364
13	1279
14	1243
15	1193
16	1199
17	1186
18	1281
19	1307
20	1087
21	959
22	809
23	702
7	11307
0	474
1	323
2	193
3	137
4	119
5	197
6	252
7	405
8	603
9	770
10	808
11	938
12	728
13	676
14	613
15	592
16	553
17	558
18	498
19	552
20	387
21	349
22	325
23	257
8	7528
0	180
1	164
2	105
3	71
4	64
5	77
6	110
7	194
8	309
9	428
10	507
11	503
12	487
13	500
14	531
15	465
16	438
17	406
18	405
19	405
20	335
21	343
22	277
23	224
9	3094
0	198
1	90
2	48
3	28
4	18
5	45
6	47
7	80
8	152
9	175
10	227
11	285
12	216
13	209
14	176
15	165
16	156
17	190
18	177
19	133
20	127
21	34
22	60
23	58
10	1752
0	43
1	24
2	16
3	9
4	12
5	19
6	35
7	46
8	71
9	103
10	125
11	123
12	120
13	108
14	123
15	96
16	114
17	105
18	103
19	94
20	84
21	86
22	55
23	38
11	1176
0	23
1	13
2	14
3	2
4	7
5	12
6	19
7	36
8	55
9	89
10	77
11	85
12	91
13	71
14	62
15	73
16	81
17	64
18	51
19	62
20	62
21	39
22	48
23	40
(en blanco)
(en blanco)
Total general	64189
